# Supplementary material for: Significant EHR Feature-Driven T2D Inference: Predictive Machine Learning and Networks
Source: Front Big Data. 2019 Sep 27;2:30. doi: 10.3389/fdata.2019.00030 (PMC7931876; doi:10.3389/fdata.2019.00030)
Supplement: Supplementary Table 1 — Data summaries. [file Table_1.XLSX]

## Sheet: icd9
DIAGNOSIS CODE	Variables	LONG DESCRIPTION	SHORT DESCRIPTION
0010	ICD001	Cholera due to vibrio cholerae	Cholera d/t vib cholerae
0011	KO	Cholera due to vibrio cholerae el tor	Cholera d/t vib el tor
0019	KO	Cholera, unspecified	Cholera NOS
0020	ICD002	Typhoid fever	Typhoid fever
0021	KO	Paratyphoid fever A	Paratyphoid fever a
0022	KO	Paratyphoid fever B	Paratyphoid fever b
0023	KO	Paratyphoid fever C	Paratyphoid fever c
0029	KO	Paratyphoid fever, unspecified	Paratyphoid fever NOS
0030	ICD003	Salmonella gastroenteritis	Salmonella enteritis
0031	KO	Salmonella septicemia	Salmonella septicemia
00320	KO	Localized salmonella infection, unspecified	Local salmonella inf NOS
00321	KO	Salmonella meningitis	Salmonella meningitis
00322	KO	Salmonella pneumonia	Salmonella pneumonia
00323	KO	Salmonella arthritis	Salmonella arthritis
00324	KO	Salmonella osteomyelitis	Salmonella osteomyelitis
00329	KO	Other localized salmonella infections	Local salmonella inf NEC
0038	KO	Other specified salmonella infections	Salmonella infection NEC
0039	KO	Salmonella infection, unspecified	Salmonella infection NOS
0040	ICD004	Shigella dysenteriae	Shigella dysenteriae
0041	KO	Shigella flexneri	Shigella flexneri
0042	KO	Shigella boydii	Shigella boydii
0043	KO	Shigella sonnei	Shigella sonnei
0048	KO	Other specified shigella infections	Shigella infection NEC
0049	KO	Shigellosis, unspecified	Shigellosis NOS
0050	ICD005	Staphylococcal food poisoning	Staph food poisoning
0051	KO	Botulism food poisoning	Botulism food poisoning
0052	KO	Food poisoning due to Clostridium perfringens (C. welchii)	Food pois d/t c. perfrin
0053	KO	Food poisoning due to other Clostridia	Food pois: clostrid NEC
0054	KO	Food poisoning due to Vibrio parahaemolyticus	Food pois: v. parahaem
00581	KO	Food poisoning due to Vibrio vulnificus	Food poisn d/t v. vulnif
00589	KO	Other bacterial food poisoning	Bact food poisoning NEC
0059	KO	Food poisoning, unspecified	Food poisoning NOS
0060	ICD006	Acute amebic dysentery without mention of abscess	Ac amebiasis w/o abscess
0061	KO	Chronic intestinal amebiasis without mention of abscess	Chr amebiasis w/o absces
0062	KO	Amebic nondysenteric colitis	Amebic nondysent colitis
0063	KO	Amebic liver abscess	Amebic liver abscess
0064	KO	Amebic lung abscess	Amebic lung abscess
0065	KO	Amebic brain abscess	Amebic brain abscess
0066	KO	Amebic skin ulceration	Amebic skin ulceration
0068	KO	Amebic infection of other sites	Amebic infection NEC
0069	KO	Amebiasis, unspecified	Amebiasis NOS
0070	ICD007	Balantidiasis	Balantidiasis
0071	KO	Giardiasis	Giardiasis
0072	KO	Coccidiosis	Coccidiosis
0073	KO	Intestinal trichomoniasis	Intest trichomoniasis
0074	KO	Cryptosporidiosis	Cryptosporidiosis
0075	KO	Cyclosporiasis	Cyclosporiasis
0078	KO	Other specified protozoal intestinal diseases	Protozoal intest dis NEC
0079	KO	Unspecified protozoal intestinal disease	Protozoal intest dis NOS
00800	ICD008	Intestinal infection due to E. coli, unspecified	Intest infec e coli NOS
00801	KO	Intestinal infection due to enteropathogenic E. coli	Int inf e coli entrpath
00802	KO	Intestinal infection due to enterotoxigenic E. coli	Int inf e coli entrtoxgn
00803	KO	Intestinal infection due to enteroinvasive E. coli	Int inf e coli entrnvsv
00804	KO	Intestinal infection due to enterohemorrhagic E. coli	Int inf e coli entrhmrg
00809	KO	Intestinal infection due to other intestinal E. coli infections	Int inf e coli spcf NEC
0081	KO	Intestinal infection due to arizona group of paracolon bacilli	Arizona enteritis
0082	KO	Intestinal infection due to aerobacter aerogenes	Aerobacter enteritis
0083	KO	Intestinal infection due to proteus (mirabilis) (morganii)	Proteus enteritis
00841	KO	Intestinal infection due to staphylococcus	Staphylococc enteritis
00842	KO	Intestinal infection due to pseudomonas	Pseudomonas enteritis
00843	KO	Intestinal infection due to campylobacter	Int infec campylobacter
00844	KO	Intestinal infection due to yersinia enterocolitica	Int inf yrsnia entrcltca
00845	KO	Intestinal infection due to Clostridium difficile	Int inf clstrdium dfcile
00846	KO	Intestinal infection due to other anaerobes	Intes infec oth anerobes
00847	KO	Intestinal infection due to other gram-negative bacteria	Int inf oth grm neg bctr
00849	KO	Intestinal infection due to other organisms	Bacterial enteritis NEC
0085	KO	Bacterial enteritis, unspecified	Bacterial enteritis NOS
00861	KO	Enteritis due to rotavirus	Intes infec rotavirus
00862	KO	Enteritis due to adenovirus	Intes infec adenovirus
00863	KO	Enteritis due to norwalk virus	Int inf norwalk virus
00864	KO	Enteritis due to other small round viruses [SRV's]	Int inf oth sml rnd vrus
00865	KO	Enteritis due to calicivirus	Enteritis d/t calicivirs
00866	KO	Enteritis due to astrovirus	Intes infec astrovirus
00867	KO	Enteritis due to enterovirus nec	Int inf enterovirus NEC
00869	KO	Enteritis due to other viral enteritis	Other viral intes infec
0088	KO	Intestinal infection due to other organism, not elsewhere classified	Viral enteritis NOS
0090	ICD009	Infectious colitis, enteritis, and gastroenteritis	Infectious enteritis NOS
0091	KO	Colitis, enteritis, and gastroenteritis of presumed infectious origin	Enteritis of infect orig
0092	KO	Infectious diarrhea	Infectious diarrhea NOS
0093	KO	Diarrhea of presumed infectious origin	Diarrhea of infect orig
01000	ICD010	Primary tuberculous infection, unspecified	Prim TB complex-unspec
01001	KO	Primary tuberculous infection, bacteriological or histological examination not done	Prim TB complex-no exam
01002	KO	Primary tuberculous infection, bacteriological or histological examination unknown (at present)	Prim TB complex-exm unkn
01003	KO	Primary tuberculous infection, tubercle bacilli found (in sputum) by microscopy	Prim TB complex-micro dx
01004	KO	Primary tuberculous infection, tubercle bacilli not found (in sputum) by microscopy, but found by bacterial culture	Prim TB complex-cult dx
01005	KO	Primary tuberculous infection, tubercle bacilli not found by bacteriological examination, but tuberculosis confirmed histologically	Prim TB complex-histo dx
01006	KO	Primary tuberculous infection, tubercle bacilli not found by bacteriological or histological examination, but tuberculosis confirmed by other methods [inoculation of animals]	Prim TB complex-oth test
01010	KO	Tuberculous pleurisy in primary progressive tuberculosis, unspecified	Prim TB pleurisy-unspec
01011	KO	Tuberculous pleurisy in primary progressive tuberculosis, bacteriological or histological examination not done	Prim TB pleurisy-no exam
01012	KO	Tuberculous pleurisy in primary progressive tuberculosis, bacteriological or histological examination unknown (at present)	Prim TB pleur-exam unkn
01013	KO	Tuberculous pleurisy in primary progressive tuberculosis, tubercle bacilli found (in sputum) by microscopy	Prim TB pleuris-micro dx
01014	KO	Tuberculous pleurisy in primary progressive tuberculosis, tubercle bacilli not found (in sputum) by microscopy, but found by bacterial culture	Prim TB pleurisy-cult dx
01015	KO	Tuberculous pleurisy in primary progressive tuberculosis, tubercle bacilli not found by bacteriological examination, but tuberculosis confirmed histologically	Prim TB pleuris-histo dx
01016	KO	Tuberculous pleurisy in primary progressive tuberculosis, tubercle bacilli not found by bacteriological or histological examination, but tuberculosis confirmed by other methods [inoculation of animals]	Prim TB pleuris-oth test
01080	KO	Other primary progressive tuberculosis, unspecified	Prim prog TB NEC-unspec
01081	KO	Other primary progressive tuberculosis, bacteriological or histological examination not done	Prim prog TB NEC-no exam
01082	KO	Other primary progressive tuberculosis, bacteriological or histological examination unknown (at present)	Prim pr TB NEC-exam unkn
01083	KO	Other primary progressive tuberculosis, tubercle bacilli found (in sputum) by microscopy	Prim prg TB NEC-micro dx
01084	KO	Other primary progressive tuberculosis, tubercle bacilli not found (in sputum) by microscopy, but found by bacterial culture	Prim prog TB NEC-cult dx
01085	KO	Other primary progressive tuberculosis, tubercle bacilli not found by bacteriological examination, but tuberculosis confirmed histologically	Prim prg TB NEC-histo dx
01086	KO	Other primary progressive tuberculosis, tubercle bacilli not found by bacteriological or histological examination, but tuberculosis confirmed by other methods [inoculation of animals]	Prim prg TB NEC-oth test
01090	KO	Primary tuberculous infection, unspecified, unspecified	Primary TB NOS-unspec
01091	KO	Primary tuberculous infection, unspecified, bacteriological or histological examination not done	Primary TB NOS-no exam
01092	KO	Primary tuberculous infection, unspecified, bacteriological or histological examination unknown (at present)	Primary TB NOS-exam unkn
01093	KO	Primary tuberculous infection, unspecified, tubercle bacilli found (in sputum) by microscopy	Primary TB NOS-micro dx
01094	KO	Primary tuberculous infection, unspecified, tubercle bacilli not found (in sputum) by microscopy, but found by bacterial culture	Primary TB NOS-cult dx
01095	KO	Primary tuberculous infection, unspecified, tubercle bacilli not found by bacteriological examination, but tuberculosis confirmed histologically	Primary TB NOS-histo dx
01096	KO	Primary tuberculous infection, unspecified, tubercle bacilli not found by bacteriological or histological examination, but tuberculosis confirmed by other methods [inoculation of animals]	Primary TB NOS-oth test
01100	ICD011	Tuberculosis of lung, infiltrative, unspecified	TB lung infiltr-unspec
01101	KO	Tuberculosis of lung, infiltrative, bacteriological or histological examination not done	TB lung infiltr-no exam
01102	KO	Tuberculosis of lung, infiltrative, bacteriological or histological examination unknown (at present)	TB lung infiltr-exm unkn
01103	KO	Tuberculosis of lung, infiltrative, tubercle bacilli found (in sputum) by microscopy	TB lung infiltr-micro dx
01104	KO	Tuberculosis of lung, infiltrative, tubercle bacilli not found (in sputum) by microscopy, but found by bacterial culture	TB lung infiltr-cult dx
01105	KO	Tuberculosis of lung, infiltrative, tubercle bacilli not found by bacteriological examination, but tuberculosis confirmed histologically	TB lung infiltr-histo dx
01106	KO	Tuberculosis of lung, infiltrative, tubercle bacilli not found bacteriological or histological examination, but tuberculosis confirmed by other methods [inoculation of animals]	TB lung infiltr-oth test
01110	KO	Tuberculosis of lung, nodular, unspecified	TB lung nodular-unspec
01111	KO	Tuberculosis of lung, nodular, bacteriological or histological examination not done	TB lung nodular-no exam
01112	KO	Tuberculosis of lung, nodular, bacteriological or histological examination unknown (at present)	TB lung nodul-exam unkn
01113	KO	Tuberculosis of lung, nodular, tubercle bacilli found (in sputum) by microscopy	TB lung nodular-micro dx
01114	KO	Tuberculosis of lung, nodular, tubercle bacilli not found (in sputum) by microscopy, but found by bacterial culture	TB lung nodular-cult dx
01115	KO	Tuberculosis of lung, nodular, tubercle bacilli not found by bacteriological examination, but tuberculosis confirmed histologically	TB lung nodular-histo dx
01116	KO	Tuberculosis of lung, nodular, tubercle bacilli not found by bacteriological or histological examination, but tuberculosis confirmed by other methods [inoculation of animals]	TB lung nodular-oth test
01120	KO	Tuberculosis of lung with cavitation, unspecified	TB lung w cavity-unspec
01121	KO	Tuberculosis of lung with cavitation, bacteriological or histological examination not done	TB lung w cavity-no exam
01122	KO	Tuberculosis of lung with cavitation, bacteriological or histological examination unknown (at present)	TB lung cavity-exam unkn
01123	KO	Tuberculosis of lung with cavitation, tubercle bacilli found (in sputum) by microscopy	TB lung w cavit-micro dx
01124	KO	Tuberculosis of lung with cavitation, tubercle bacilli not found (in sputum) by microscopy, but found by bacterial culture	TB lung w cavity-cult dx
01125	KO	Tuberculosis of lung with cavitation, tubercle bacilli not found by bacteriological examination, but tuberculosis confirmed histologically	TB lung w cavit-histo dx
01126	KO	Tuberculosis of lung with cavitation, tubercle bacilli not found by bacteriological or histological examination, but tuberculosis confirmed by other methods [inoculation of animals]	TB lung w cavit-oth test
01130	KO	Tuberculosis of bronchus, unspecified	TB of bronchus-unspec
01131	KO	Tuberculosis of bronchus, bacteriological or histological examination not done	TB of bronchus-no exam
01132	KO	Tuberculosis of bronchus, bacteriological or histological examination unknown (at present)	TB of bronchus-exam unkn
01133	KO	Tuberculosis of bronchus, tubercle bacilli found (in sputum) by microscopy	TB of bronchus-micro dx
01134	KO	Tuberculosis of bronchus, tubercle bacilli not found (in sputum) by microscopy, but found in bacterial culture	TB of bronchus-cult dx
01135	KO	Tuberculosis of bronchus, tubercle bacilli not found by bacteriological examination, but tuberculosis confirmed histologically	TB of bronchus-histo dx
01136	KO	Tuberculosis of bronchus, tubercle bacilli not found by bacteriological or histological examination, but tuberculosis confirmed by other methods [inoculation of animals]	TB of bronchus-oth test
01140	KO	Tuberculous fibrosis of lung, unspecified	TB lung fibrosis-unspec
01141	KO	Tuberculous fibrosis of lung, bacteriological or histological examination not done	TB lung fibrosis-no exam
01142	KO	Tuberculous fibrosis of lung, bacteriological or histological examination unknown (at present)	TB lung fibros-exam unkn
01143	KO	Tuberculous fibrosis of lung, tubercle bacilli found (in sputum) by microscopy	TB lung fibros-micro dx
01144	KO	Tuberculous fibrosis of lung, tubercle bacilli not found (in sputum) by microscopy, but found by bacterial culture	TB lung fibrosis-cult dx
01145	KO	Tuberculous fibrosis of lung, tubercle bacilli not found by bacteriological examination, but tuberculosis confirmed histologically	TB lung fibros-histo dx
01146	KO	Tuberculous fibrosis of lung, tubercle bacilli not found by bacteriological or histological examination, but tuberculosis confirmed by other methods [inoculation of animals]	TB lung fibros-oth test
01150	KO	Tuberculous bronchiectasis, unspecified	TB bronchiectasis-unspec
01151	KO	Tuberculous bronchiectasis, bacteriological or histological examination not done	TB bronchiect-no exam
01152	KO	Tuberculous bronchiectasis, bacteriological or histological examination unknown (at present)	TB bronchiect-exam unkn
01153	KO	Tuberculous bronchiectasis, tubercle bacilli found (in sputum) by microscopy	TB bronchiect-micro dx
01154	KO	Tuberculous bronchiectasis, tubercle bacilli not found (in sputum) by microscopy, but found by bacterial culture	TB bronchiect-cult dx
01155	KO	Tuberculous bronchiectasis, tubercle bacilli not found by bacteriological examination, but tuberculosis confirmed histologically	TB bronchiect-histo dx
01156	KO	Tuberculous bronchiectasis, tubercle bacilli not found by bacteriological or histological examination, but tuberculosis confirmed by other methods [inoculation of animals]	TB bronchiect-oth test
01160	KO	Tuberculous pneumonia [any form], unspecified	TB pneumonia-unspec
01161	KO	Tuberculous pneumonia [any form], bacteriological or histological examination not done	TB pneumonia-no exam
01162	KO	Tuberculous pneumonia [any form], bacteriological or histological examination unknown (at present)	TB pneumonia-exam unkn
01163	KO	Tuberculous pneumonia [any form], tubercle bacilli found (in sputum) by microscopy	TB pneumonia-micro dx
01164	KO	Tuberculous pneumonia [any form], tubercle bacilli not found (in sputum) by microscopy, but found by bacterial culture	TB pneumonia-cult dx
01165	KO	Tuberculous pneumonia [any form], tubercle bacilli not found by bacteriological examination, but tuberculosis confirmed histologically	TB pneumonia-histo dx
01166	KO	Tuberculous pneumonia [any form], tubercle bacilli not found by bacteriological or histological examination, but tuberculosis confirmed by other methods [inoculation of animals]	TB pneumonia-oth test
01170	KO	Tuberculous pneumothorax, unspecified	TB pneumothorax-unspec
01171	KO	Tuberculous pneumothorax, bacteriological or histological examination not done	TB pneumothorax-no exam
01172	KO	Tuberculous pneumothorax, bacteriological or histological examination unknown (at present)	TB pneumothorx-exam unkn
01173	KO	Tuberculous pneumothorax, tubercle bacilli found (in sputum) by microscopy	TB pneumothorax-micro dx
01174	KO	Tuberculous pneumothorax, tubercle bacilli not found (in sputum) by microscopy, but found by bacterial culture	TB pneumothorax-cult dx
01175	KO	Tuberculous pneumothorax, tubercle bacilli not found by bacteriological examination, but tuberculosis confirmed histologically	TB pneumothorax-histo dx
01176	KO	Tuberculous pneumothorax, tubercle bacilli not found by bacteriological or histological examination, but tuberculosis confirmed by other methods [inoculation of animals]	TB pneumothorax-oth test
01180	KO	Other specified pulmonary tuberculosis, unspecified	Pulmonary TB NEC-unspec
01181	KO	Other specified pulmonary tuberculosis, bacteriological or histological examination not done	Pulmonary TB NEC-no exam
01182	KO	Other specified pulmonary tuberculosis, bacteriological or histological examination unknown (at present)	Pulmon TB NEC-exam unkn
01183	KO	Other specified pulmonary tuberculosis, tubercle bacilli found (in sputum) by microscopy	Pulmon TB NEC-micro dx
01184	KO	Other specified pulmonary tuberculosis, tubercle bacilli not found (in sputum) by microscopy, but found by bacterial culture	Pulmon TB NEC-cult dx
01185	KO	Other specified pulmonary tuberculosis, tubercle bacilli not found by bacteriological examination, but tuberculosis confirmed histologically	Pulmon TB NEC-histo dx
01186	KO	Other specified pulmonary tuberculosis, tubercle bacilli not found by bacteriological or histological examination, but tuberculosis confirmed by other methods [inoculation of animals]	Pulmon TB NEC-oth test
01190	KO	Pulmonary tuberculosis, unspecified, unspecified	Pulmonary TB NOS-unspec
01191	KO	Pulmonary tuberculosis, unspecified, bacteriological or histological examination not done	Pulmonary TB NOS-no exam
01192	KO	Pulmonary tuberculosis, unspecified, bacteriological or histological examination unknown (at present)	Pulmon TB NOS-exam unkn
01193	KO	Pulmonary tuberculosis, unspecified, tubercle bacilli found (in sputum) by microscopy	Pulmon TB NOS-micro dx
01194	KO	Pulmonary tuberculosis, unspecified, tubercle bacilli not found (in sputum) by microscopy, but found by bacterial culture	Pulmon TB NOS-cult dx
01195	KO	Pulmonary tuberculosis, unspecified, tubercle bacilli not found by bacteriological examination, but tuberculosis confirmed histologically	Pulmon TB NOS-histo dx
01196	KO	Pulmonary tuberculosis, unspecified, tubercle bacilli not found by bacteriological or histological examination, but tuberculosis confirmed by other methods [inoculation of animals]	Pulmon TB NOS-oth test
01200	ICD012	Tuberculous pleurisy, unspecified	TB pleurisy-unspec
01201	KO	Tuberculous pleurisy, bacteriological or histological examination not done	TB pleurisy-no exam
01202	KO	Tuberculous pleurisy, bacteriological or histological examination unknown (at present)	TB pleurisy-exam unkn
01203	KO	Tuberculous pleurisy, tubercle bacilli found (in sputum) by microscopy	TB pleurisy-micro dx
01204	KO	Tuberculous pleurisy, tubercle bacilli not found (in sputum) by microscopy, but found by bacterial culture	TB pleurisy-cult dx
01205	KO	Tuberculous pleurisy, tubercle bacilli not found by bacteriological examination, but tuberculosis confirmed histologically	TB pleurisy-histolog dx
01206	KO	Tuberculous pleurisy, tubercle bacilli not found by bacteriological or histological examination, but tuberculosis confirmed by other methods [inoculation of animals]	TB pleurisy-oth test
01210	KO	Tuberculosis of intrathoracic lymph nodes, unspecified	TB thoracic nodes-unspec
01211	KO	Tuberculosis of intrathoracic lymph nodes, bacteriological or histological examination not done	TB thorax node-no exam
01212	KO	Tuberculosis of intrathoracic lymph nodes, bacteriological or histological examination unknown (at present)	TB thorax node-exam unkn
01213	KO	Tuberculosis of intrathoracic lymph nodes, tubercle bacilli found (in sputum) by microscopy	TB thorax node-micro dx
01214	KO	Tuberculosis of intrathoracic lymph nodes, tubercle bacilli not found (in sputum) by microscopy, but found by bacterial culture	TB thorax node-cult dx
01215	KO	Tuberculosis of intrathoracic lymph nodes, tubercle bacilli not found by bacteriological examination, but tuberculosis confirmed histologically	TB thorax node-histo dx
01216	KO	Tuberculosis of intrathoracic lymph nodes, tubercle bacilli not found by bacteriological or histological examination, but tuberculosis confirmed by other methods [inoculation of animals]	TB thorax node-oth test
01220	KO	Isolated tracheal or bronchial tuberculosis, unspecified	Isol tracheal tb-unspec
01221	KO	Isolated tracheal or bronchial tuberculosis, bacteriological or histological examination not done	Isol tracheal tb-no exam
01222	KO	Isolated tracheal or bronchial tuberculosis, bacteriological or histological examination unknown (at present)	Isol trach tb-exam unkn
01223	KO	Isolated tracheal or bronchial tuberculosis, tubercle bacilli found (in sputum) by microscopy	Isolat trach tb-micro dx
01224	KO	Isolated tracheal or bronchial tuberculosis, tubercle bacilli not found (in sputum) by microscopy, but found by bacterial culture	Isol tracheal tb-cult dx
01225	KO	Isolated tracheal or bronchial tuberculosis, tubercle bacilli not found by bacteriological examination, but tuberculosis confirmed histologically	Isolat trach tb-histo dx
01226	KO	Isolated tracheal or bronchial tuberculosis, tubercle bacilli not found by bacteriological or histological examination, but tuberculosis confirmed by other methods [inoculation of animals]	Isolat trach tb-oth test
01230	KO	Tuberculous laryngitis, unspecified	TB laryngitis-unspec
01231	KO	Tuberculous laryngitis, bacteriological or histological examination not done	TB laryngitis-no exam
01232	KO	Tuberculous laryngitis, bacteriological or histological examination unknown (at present)	TB laryngitis-exam unkn
01233	KO	Tuberculous laryngitis, tubercle bacilli found (in sputum) by microscopy	TB laryngitis-micro dx
01234	KO	Tuberculous laryngitis, tubercle bacilli not found (in sputum) by microscopy, but found by bacterial culture	TB laryngitis-cult dx
01235	KO	Tuberculous laryngitis, tubercle bacilli not found by bacteriological examination, but tuberculosis confirmed histologically	TB laryngitis-histo dx
01236	KO	Tuberculous laryngitis, tubercle bacilli not found by bacteriological or histological examination, but tuberculosis confirmed by other methods [inoculation of animals]	TB laryngitis-oth test
01280	KO	Other specified respiratory tuberculosis, unspecified	Resp TB NEC-unspec
01281	KO	Other specified respiratory tuberculosis, bacteriological or histological examination not done	Resp TB NEC-no exam
01282	KO	Other specified respiratory tuberculosis, bacteriological or histological examination unknown (at present)	Resp TB NEC-exam unkn
01283	KO	Other specified respiratory tuberculosis, tubercle bacilli found (in sputum) by microscopy	Resp TB NEC-micro dx
01284	KO	Other specified respiratory tuberculosis, tubercle bacilli not found (in sputum) by microscopy, but found by bacterial culture	Resp TB NEC-cult dx
01285	KO	Other specified respiratory tuberculosis, tubercle bacilli not found by bacteriological examination, but tuberculosis confirmed histologically	Resp TB NEC-histo dx
01286	KO	Other specified respiratory tuberculosis, tubercle bacilli not found by bacteriological or histological examination, but tuberculosis confirmed by other methods [inoculation of animals]	Resp TB NEC-oth test
01300	ICD013	Tuberculous meningitis, unspecified	TB meningitis-unspec
01301	KO	Tuberculous meningitis, bacteriological or histological examination not done	TB meningitis-no exam
01302	KO	Tuberculous meningitis, bacteriological or histological examination unknown (at present)	TB meningitis-exam unkn
01303	KO	Tuberculous meningitis, tubercle bacilli found (in sputum) by microscopy	TB meningitis-micro dx
01304	KO	Tuberculous meningitis, tubercle bacilli not found (in sputum) by microscopy, but found by bacterial culture	TB meningitis-cult dx
01305	KO	Tuberculous meningitis, tubercle bacilli not found by bacteriological examination, but tuberculosis confirmed histologically	TB meningitis-histo dx
01306	KO	Tuberculous meningitis, tubercle bacilli not found by bacteriological or histological examination, but tuberculosis confirmed by other methods [inoculation of animals]	TB meningitis-oth test
01310	KO	Tuberculoma of meninges, unspecified	Tubrclma meninges-unspec
01311	KO	Tuberculoma of meninges, bacteriological or histological examination not done	Tubrclma mening-no exam
01312	KO	Tuberculoma of meninges, bacteriological or histological examination unknown (at present)	Tubrclma menin-exam unkn
01313	KO	Tuberculoma of meninges, tubercle bacilli found (in sputum) by microscopy	Tubrclma mening-micro dx
01314	KO	Tuberculoma of meninges, tubercle bacilli not found (in sputum) by microscopy, but found by bacterial culture	Tubrclma mening-cult dx
01315	KO	Tuberculoma of meninges, tubercle bacilli not found by bacteriological examination, but tuberculosis confirmed histologically	Tubrclma mening-histo dx
01316	KO	Tuberculoma of meninges, tubercle bacilli not found by bacteriological or histological examination, but tuberculosis confirmed by other methods [inoculation of animals]	Tubrclma mening-oth test
01320	KO	Tuberculoma of brain, unspecified	Tuberculoma brain-unspec
01321	KO	Tuberculoma of brain, bacteriological or histological examination not done	Tubrcloma brain-no exam
01322	KO	Tuberculoma of brain, bacteriological or histological examination unknown (at present)	Tubrclma brain-exam unkn
01323	KO	Tuberculoma of brain, tubercle bacilli found (in sputum) by microscopy	Tubrcloma brain-micro dx
01324	KO	Tuberculoma of brain, tubercle bacilli not found (in sputum) by microscopy, but found by bacterial culture	Tubrcloma brain-cult dx
01325	KO	Tuberculoma of brain, tubercle bacilli not found by bacteriological examination, but tuberculosis confirmed histologically	Tubrcloma brain-histo dx
01326	KO	Tuberculoma of brain, tubercle bacilli not found by bacteriological or histological examination, but tuberculosis confirmed by other methods [inoculation of animals]	Tubrcloma brain-oth test
01330	KO	Tuberculous abscess of brain, unspecified	TB brain abscess-unspec
01331	KO	Tuberculous abscess of brain, bacteriological or histological examination not done	TB brain abscess-no exam
01332	KO	Tuberculous abscess of brain, bacteriological or histological examination unknown (at present)	TB brain absc-exam unkn
01333	KO	Tuberculous abscess of brain, tubercle bacilli found (in sputum) by microscopy	TB brain absc-micro dx
01334	KO	Tuberculous abscess of brain, tubercle bacilli not found (in sputum) by microscopy, but found by bacterial culture	TB brain abscess-cult dx
01335	KO	Tuberculous abscess of brain, tubercle bacilli not found by bacteriological examination, but tuberculosis confirmed histologically	TB brain absc-histo dx
01336	KO	Tuberculous abscess of brain, tubercle bacilli not found by bacteriological or histological examination, but tuberculosis confirmed by other methods [inoculation of animals]	TB brain absc-oth test
01340	KO	Tuberculoma of spinal cord, unspecified	Tubrclma sp cord-unspec
01341	KO	Tuberculoma of spinal cord, bacteriological or histological examination not done	Tubrclma sp cord-no exam
01342	KO	Tuberculoma of spinal cord, bacteriological or histological examination unknown (at present)	Tubrclma sp cd-exam unkn
01343	KO	Tuberculoma of spinal cord, tubercle bacilli found (in sputum) by microscopy	Tubrclma sp crd-micro dx
01344	KO	Tuberculoma of spinal cord, tubercle bacilli not found (in sputum) by microscopy, but found by bacterial culture	Tubrclma sp cord-cult dx
01345	KO	Tuberculoma of spinal cord, tubercle bacilli not found by bacteriological examination, but tuberculosis confirmed histologically	Tubrclma sp crd-histo dx
01346	KO	Tuberculoma of spinal cord, tubercle bacilli not found by bacteriological or histological examination, but tuberculosis confirmed by other methods [inoculation of animals]	Tubrclma sp crd-oth test
01350	KO	Tuberculous abscess of spinal cord, unspecified	TB sp crd abscess-unspec
01351	KO	Tuberculous abscess of spinal cord, bacteriological or histological examination not done	TB sp crd absc-no exam
01352	KO	Tuberculous abscess of spinal cord, bacteriological or histological examination unknown (at present)	TB sp crd absc-exam unkn
01353	KO	Tuberculous abscess of spinal cord, tubercle bacilli found (in sputum) by microscopy	TB sp crd absc-micro dx
01354	KO	Tuberculous abscess of spinal cord, tubercle bacilli not found (in sputum) by microscopy, but found by bacterial culture	TB sp crd absc-cult dx
01355	KO	Tuberculous abscess of spinal cord, tubercle bacilli not found by bacteriological examination, but tuberculosis confirmed histologically	TB sp crd absc-histo dx
01356	KO	Tuberculous abscess of spinal cord, tubercle bacilli not found by bacteriological or histological examination, but tuberculosis confirmed by other methods [inoculation of animals]	TB sp crd absc-oth test
01360	KO	Tuberculous encephalitis or myelitis, unspecified	TB encephalitis-unspec
01361	KO	Tuberculous encephalitis or myelitis, bacteriological or histological examination not done	TB encephalitis-no exam
01362	KO	Tuberculous encephalitis or myelitis, bacteriological or histological examination unknown (at present)	TB encephalit-exam unkn
01363	KO	Tuberculous encephalitis or myelitis, tubercle bacilli found (in sputum) by microscopy	TB encephalitis-micro dx
01364	KO	Tuberculous encephalitis or myelitis, tubercle bacilli not found (in sputum) by microscopy, but found by bacterial culture	TB encephalitis-cult dx
01365	KO	Tuberculous encephalitis or myelitis, tubercle bacilli not found by bacteriological examination, but tuberculosis confirmed histologically	TB encephalitis-histo dx
01366	KO	Tuberculous encephalitis or myelitis, tubercle bacilli not found by bacteriological or histological examination, but tuberculosis confirmed by other methods [inoculation of animals]	TB encephalitis-oth test
01380	KO	Other specified tuberculosis of central nervous system, unspecified	Cns TB NEC-unspec
01381	KO	Other specified tuberculosis of central nervous system, bacteriological or histological examination not done	Cns TB NEC-no exam
01382	KO	Other specified tuberculosis of central nervous system, bacteriological or histological examination unknown (at present)	Cns TB NEC-exam unkn
01383	KO	Other specified tuberculosis of central nervous system, tubercle bacilli found (in sputum) by microscopy	Cns TB NEC-micro dx
01384	KO	Other specified tuberculosis of central nervous system, tubercle bacilli not found (in sputum) by microscopy, but found by bacterial culture	Cns TB NEC-cult dx
01385	KO	Other specified tuberculosis of central nervous system, tubercle bacilli not found by bacteriological examination, but tuberculosis confirmed histologically	Cns TB NEC-histo dx
01386	KO	Other specified tuberculosis of central nervous system, tubercle bacilli not found by bacteriological or histological examination, but tuberculosis confirmed by other methods [inoculation of animals]	Cns TB NEC-oth test
01390	KO	Unspecified tuberculosis of central nervous system, unspecified	Cns TB NOS-unspec
01391	KO	Unspecified tuberculosis of central nervous system, bacteriological or histological examination not done	Cns TB NOS-no exam
01392	KO	Unspecified tuberculosis of central nervous system, bacteriological or histological examination unknown (at present)	Cns TB NOS-exam unkn
01393	KO	Unspecified tuberculosis of central nervous system, tubercle bacilli found (in sputum) by microscopy	Cns TB NOS-micro dx
01394	KO	Unspecified tuberculosis of central nervous system, tubercle bacilli not found (in sputum) by microscopy, but found by bacterial culture	Cns TB NOS-cult dx
01395	KO	Unspecified tuberculosis of central nervous system, tubercle bacilli not found by bacteriological examination, but tuberculosis confirmed histologically	Cns TB NOS-histo dx
01396	KO	Unspecified tuberculosis of central nervous system, tubercle bacilli not found by bacteriological or histological examination, but tuberculosis confirmed by other methods [inoculation of animals]	Cns TB NOS-oth test
01400	ICD014	Tuberculous peritonitis, unspecified	TB peritonitis-unspec
01401	KO	Tuberculous peritonitis, bacteriological or histological examination not done	TB peritonitis-no exam
01402	KO	Tuberculous peritonitis, bacteriological or histological examination unknown (at present)	TB peritonitis-exam unkn
01403	KO	Tuberculous peritonitis, tubercle bacilli found (in sputum) by microscopy	TB peritonitis-micro dx
01404	KO	Tuberculous peritonitis, tubercle bacilli not found (in sputum) by microscopy, but found by bacterial culture	TB peritonitis-cult dx
01405	KO	Tuberculous peritonitis, tubercle bacilli not found by bacteriological examination, but tuberculosis confirmed histologically	TB peritonitis-histo dx
01406	KO	Tuberculous peritonitis, tubercle bacilli not found by bacteriological or histological examination, but tuberculosis confirmed by other methods [inoculation of animals]	TB peritonitis-oth test
01480	KO	Other tuberculosis of intestines, peritoneum, and mesenteric glands, unspecified	Intestinal TB NEC-unspec
01481	KO	Other tuberculosis of intestines, peritoneum, and mesenteric glands, bacteriological or histological examination not done	Intestin TB NEC-no exam
01482	KO	Other tuberculosis of intestines, peritoneum, and mesenteric glands, bacteriological or histological examination unknown (at present)	Intest TB NEC-exam unkn
01483	KO	Other tuberculosis of intestines, peritoneum, and mesenteric glands, tubercle bacilli found (in sputum) by microscopy	Intestin TB NEC-micro dx
01484	KO	Other tuberculosis of intestines, peritoneum, and mesenteric glands, tubercle bacilli not found (in sputum) by microscopy, but found by bacterial culture	Intestin TB NEC-cult dx
01485	KO	Other tuberculosis of intestines, peritoneum, and mesenteric glands, tubercle bacilli not found by bacteriological examination, but tuberculosis confirmed histologically	Intestin TB NEC-histo dx
01486	KO	Other tuberculosis of intestines, peritoneum, and mesenteric glands, tubercle bacilli not found by bacteriological or histological examination, but tuberculosis confirmed by other methods [inoculation of animals]	Intestin TB NEC-oth test
01500	ICD015	Tuberculosis of vertebral column, unspecified	TB of vertebra-unspec
01501	KO	Tuberculosis of vertebral column, bacteriological or histological examination not done	TB of vertebra-no exam
01502	KO	Tuberculosis of vertebral column, bacteriological or histological examination unknown (at present)	TB of vertebra-exam unkn
01503	KO	Tuberculosis of vertebral column, tubercle bacilli found (in sputum) by microscopy	TB of vertebra-micro dx
01504	KO	Tuberculosis of vertebral column, tubercle bacilli not found (in sputum) by microscopy, but found by bacterial culture	TB of vertebra-cult dx
01505	KO	Tuberculosis of vertebral column, tubercle bacilli not found by bacteriological examination, but tuberculosis confirmed histologically	TB of vertebra-histo dx
01506	KO	Tuberculosis of vertebral column, tubercle bacilli not found by bacteriological or histological examination, but tuberculosis confirmed by other methods [inoculation of animals]	TB of vertebra-oth test
01510	KO	Tuberculosis of hip, unspecified	TB of hip-unspec
01511	KO	Tuberculosis of hip, bacteriological or histological examination not done	TB of hip-no exam
01512	KO	Tuberculosis of hip, bacteriological or histological examination unknown (at present)	TB of hip-exam unkn
01513	KO	Tuberculosis of hip, tubercle bacilli found (in sputum) by microscopy	TB of hip-micro dx
01514	KO	Tuberculosis of hip, tubercle bacilli not found (in sputum) by microscopy, but found by bacterial culture	TB of hip-cult dx
01515	KO	Tuberculosis of hip, tubercle bacilli not found by bacteriological examination, but tuberculosis confirmed histologically	TB of hip-histo dx
01516	KO	Tuberculosis of hip, tubercle bacilli not found by bacteriological or histological examination, but tuberculosis confirmed by other methods [inoculation of animals]	TB of hip-oth test
01520	KO	Tuberculosis of knee, unspecified	TB of knee-unspec
01521	KO	Tuberculosis of knee, bacteriological or histological examination not done	TB of knee-no exam
01522	KO	Tuberculosis of knee, bacteriological or histological examination unknown (at present)	TB of knee-exam unkn
01523	KO	Tuberculosis of knee, tubercle bacilli found (in sputum) by microscopy	TB of knee-micro dx
01524	KO	Tuberculosis of knee, tubercle bacilli not found (in sputum) by microscopy, but found by bacterial culture	TB of knee-cult dx
01525	KO	Tuberculosis of knee, tubercle bacilli not found by bacteriological examination, but tuberculosis confirmed histologically	TB of knee-histo dx
01526	KO	Tuberculosis of knee, tubercle bacilli not found by bacteriological or histological examination, but tuberculosis confirmed by other methods [inoculation of animals]	TB of knee-oth test
01550	KO	Tuberculosis of limb bones, unspecified	TB of limb bones-unspec
01551	KO	Tuberculosis of limb bones, bacteriological or histological examination not done	TB limb bones-no exam
01552	KO	Tuberculosis of limb bones, bacteriological or histological examination unknown (at present)	TB limb bones-exam unkn
01553	KO	Tuberculosis of limb bones, tubercle bacilli found (in sputum) by microscopy	TB limb bones-micro dx
01554	KO	Tuberculosis of limb bones, tubercle bacilli not found (in sputum) by microscopy, but found by bacterial culture	TB limb bones-cult dx
01555	KO	Tuberculosis of limb bones, tubercle bacilli not found by bacteriological examination, but tuberculosis confirmed histologically	TB limb bones-histo dx
01556	KO	Tuberculosis of limb bones, tubercle bacilli not found by bacteriological or histological examination, but tuberculosis confirmed by other methods [inoculation of animals]	TB limb bones-oth test
01560	KO	Tuberculosis of mastoid, unspecified	TB of mastoid-unspec
01561	KO	Tuberculosis of mastoid, bacteriological or histological examination not done	TB of mastoid-no exam
01562	KO	Tuberculosis of mastoid, bacteriological or histological examination unknown (at present)	TB of mastoid-exam unkn
01563	KO	Tuberculosis of mastoid, tubercle bacilli found (in sputum) by microscopy	TB of mastoid-micro dx
01564	KO	Tuberculosis of mastoid, tubercle bacilli not found (in sputum) by microscopy, but found by bacterial culture	TB of mastoid-cult dx
01565	KO	Tuberculosis of mastoid, tubercle bacilli not found by bacteriological examination, but tuberculosis confirmed histologically	TB of mastoid-histo dx
01566	KO	Tuberculosis of mastoid, tubercle bacilli not found by bacteriological or histological examination, but tuberculosis confirmed by other methods [inoculation of animals]	TB of mastoid-oth test
01570	KO	Tuberculosis of other specified bone, unspecified	TB of bone NEC-unspec
01571	KO	Tuberculosis of other specified bone, bacteriological or histological examination not done	TB of bone NEC-no exam
01572	KO	Tuberculosis of other specified bone, bacteriological or histological examination unknown (at present)	TB of bone NEC-exam unkn
01573	KO	Tuberculosis of other specified bone, tubercle bacilli found (in sputum) by microscopy	TB of bone NEC-micro dx
01574	KO	Tuberculosis of other specified bone, tubercle bacilli not found (in sputum) by microscopy, but found by bacterial culture	TB of bone NEC-cult dx
01575	KO	Tuberculosis of other specified bone, tubercle bacilli not found by bacteriological examination, but tuberculosis confirmed histologically	TB of bone NEC-histo dx
01576	KO	Tuberculosis of other specified bone, tubercle bacilli not found by bacteriological or histological examination, but tuberculosis confirmed by other methods [inoculation of animals]	TB of bone NEC-oth test
01580	KO	Tuberculosis of other specified joint, unspecified	TB of joint NEC-unspec
01581	KO	Tuberculosis of other specified joint, bacteriological or histological examination not done	TB of joint NEC-no exam
01582	KO	Tuberculosis of other specified joint, bacteriological or histological examination unknown (at present)	TB joint NEC-exam unkn
01583	KO	Tuberculosis of other specified joint, tubercle bacilli found (in sputum) by microscopy	TB of joint NEC-micro dx
01584	KO	Tuberculosis of other specified joint, tubercle bacilli not found (in sputum) by microscopy, but found by bacterial culture	TB of joint NEC-cult dx
01585	KO	Tuberculosis of other specified joint, tubercle bacilli not found by bacteriological examination, but tuberculosis confirmed histologically	TB of joint NEC-histo dx
01586	KO	Tuberculosis of other specified joint, tubercle bacilli not found by bacteriological or histological examination, but tuberculosis confirmed by other methods [inoculation of animals]	TB of joint NEC-oth test
01590	KO	Tuberculosis of unspecified bones and joints, unspecified	TB bone/joint NOS-unspec
01591	KO	Tuberculosis of unspecified bones and joints, bacteriological or histological examination not done	TB bone/jt NOS-no exam
01592	KO	Tuberculosis of unspecified bones and joints, bacteriological or histological examination unknown (at present)	TB bone/jt NOS-exam unkn
01593	KO	Tuberculosis of unspecified bones and joints, tubercle bacilli found (in sputum) by microscopy	TB bone/jt NOS-micro dx
01594	KO	Tuberculosis of unspecified bones and joints, tubercle bacilli not found (in sputum) by microscopy, but found by bacterial culture	TB bone/jt NOS-cult dx
01595	KO	Tuberculosis of unspecified bones and joints, tubercle bacilli not found by bacteriological examination, but tuberculosis confirmed histologically	TB bone/jt NOS-histo dx
01596	KO	Tuberculosis of unspecified bones and joints, tubercle bacilli not found by bacteriological or histological examination, but tuberculosis confirmed by other methods [inoculation of animals]	TB bone/jt NOS-oth test
01600	ICD016	Tuberculosis of kidney, unspecified	TB of kidney-unspec
01601	KO	Tuberculosis of kidney, bacteriological or histological examination not done	TB of kidney-no exam
01602	KO	Tuberculosis of kidney, bacteriological or histological examination unknown (at present)	TB of kidney-exam unkn
01603	KO	Tuberculosis of kidney, tubercle bacilli found (in sputum) by microscopy	TB of kidney-micro dx
01604	KO	Tuberculosis of kidney, tubercle bacilli not found (in sputum) by microscopy, but found by bacterial culture	TB of kidney-cult dx
01605	KO	Tuberculosis of kidney, tubercle bacilli not found by bacteriological examination, but tuberculosis confirmed histologically	TB of kidney-histo dx
01606	KO	Tuberculosis of kidney, tubercle bacilli not found by bacteriological or histological examination, but tuberculosis confirmed by other methods [inoculation of animals]	TB of kidney-oth test
01610	KO	Tuberculosis of bladder, unspecified	TB of bladder-unspec
01611	KO	Tuberculosis of bladder, bacteriological or histological examination not done	TB of bladder-no exam
01612	KO	Tuberculosis of bladder, bacteriological or histological examination unknown (at present)	TB of bladder-exam unkn
01613	KO	Tuberculosis of bladder, tubercle bacilli found (in sputum) by microscopy	TB of bladder-micro dx
01614	KO	Tuberculosis of bladder, tubercle bacilli not found (in sputum) by microscopy, but found by bacterial culture	TB of bladder-cult dx
01615	KO	Tuberculosis of bladder, tubercle bacilli not found by bacteriological examination, but tuberculosis confirmed histologically	TB of bladder-histo dx
01616	KO	Tuberculosis of bladder, tubercle bacilli not found by bacteriological or histological examination, but tuberculosis confirmed by other methods [inoculation of animals]	TB of bladder-oth test
01620	KO	Tuberculosis of ureter, unspecified	TB of ureter-unspec
01621	KO	Tuberculosis of ureter, bacteriological or histological examination not done	TB of ureter-no exam
01622	KO	Tuberculosis of ureter, bacteriological or histological examination unknown (at present)	TB of ureter-exam unkn
01623	KO	Tuberculosis of ureter, tubercle bacilli found (in sputum) by microscopy	TB of ureter-micro dx
01624	KO	Tuberculosis of ureter, tubercle bacilli not found (in sputum) by microscopy, but found by bacterial culture	TB of ureter-cult dx
01625	KO	Tuberculosis of ureter, tubercle bacilli not found by bacteriological examination, but tuberculosis confirmed histologically	TB of ureter-histo dx
01626	KO	Tuberculosis of ureter, tubercle bacilli not found by bacteriological or histological examination, but tuberculosis confirmed by other methods [inoculation of animals]	TB of ureter-oth test
01630	KO	Tuberculosis of other urinary organs, unspecified	TB urinary NEC-unspec
01631	KO	Tuberculosis of other urinary organs, bacteriological or histological examination not done	TB urinary NEC-no exam
01632	KO	Tuberculosis of other urinary organs, bacteriological or histological examination unknown (at present)	TB urinary NEC-exam unkn
01633	KO	Tuberculosis of other urinary organs, tubercle bacilli found (in sputum) by microscopy	TB urinary NEC-micro dx
01634	KO	Tuberculosis of other urinary organs, tubercle bacilli not found (in sputum) by microscopy, but found by bacterial culture	TB urinary NEC-cult dx
01635	KO	Tuberculosis of other urinary organs, tubercle bacilli not found by bacteriological examination, but tuberculosis confirmed histologically	TB urinary NEC-histo dx
01636	KO	Tuberculosis of other urinary organs, tubercle bacilli not found by bacteriological or histological examination, but tuberculosis confirmed by other methods [inoculation of animals]	TB urinary NEC-oth test
01640	KO	Tuberculosis of epididymis, unspecified	TB epididymis-unspec
01641	KO	Tuberculosis of epididymis, bacteriological or histological examination not done	TB epididymis-no exam
01642	KO	Tuberculosis of epididymis, bacteriological or histological examination unknown (at present)	TB epididymis-exam unkn
01643	KO	Tuberculosis of epididymis, tubercle bacilli found (in sputum) by microscopy	TB epididymis-micro dx
01644	KO	Tuberculosis of epididymis, tubercle bacilli not found (in sputum) by microscopy, but found by bacterial culture	TB epididymis-cult dx
01645	KO	Tuberculosis of epididymis, tubercle bacilli not found by bacteriological examination, but tuberculosis confirmed histologically	TB epididymis-histo dx
01646	KO	Tuberculosis of epididymis, tubercle bacilli not found by bacteriological or histological examination, but tuberculosis confirmed by other methods [inoculation of animals]	TB epididymis-oth test
01650	KO	Tuberculosis of other male genital organs, unspecified	TB male genit NEC-unspec
01651	KO	Tuberculosis of other male genital organs, bacteriological or histological examination not done	TB male gen NEC-no exam
01652	KO	Tuberculosis of other male genital organs, bacteriological or histological examination unknown (at present)	TB male gen NEC-ex unkn
01653	KO	Tuberculosis of other male genital organs, tubercle bacilli found (in sputum) by microscopy	TB male gen NEC-micro dx
01654	KO	Tuberculosis of other male genital organs, tubercle bacilli not found (in sputum) by microscopy, but found by bacterial culture	TB male gen NEC-cult dx
01655	KO	Tuberculosis of other male genital organs, tubercle bacilli not found by bacteriological examination, but tuberculosis confirmed histologically	TB male gen NEC-histo dx
01656	KO	Tuberculosis of other male genital organs, tubercle bacilli not found by bacteriological or histological examination, but tuberculosis confirmed by other methods [inoculation of animals]	TB male gen NEC-oth test
01660	KO	Tuberculous oophoritis and salpingitis, unspecified	TB ovary & tube-unspec
01661	KO	Tuberculous oophoritis and salpingitis, bacteriological or histological examination not done	TB ovary & tube-no exam
01662	KO	Tuberculous oophoritis and salpingitis, bacteriological or histological examination unknown (at present)	TB ovary/tube-exam unkn
01663	KO	Tuberculous oophoritis and salpingitis, tubercle bacilli found (in sputum) by microscopy	TB ovary & tube-micro dx
01664	KO	Tuberculous oophoritis and salpingitis, tubercle bacilli not found (in sputum) by microscopy, but found by bacterial culture	TB ovary & tube-cult dx
01665	KO	Tuberculous oophoritis and salpingitis, tubercle bacilli not found by bacteriological examination, but tuberculosis confirmed histologically	TB ovary & tube-histo dx
01666	KO	Tuberculous oophoritis and salpingitis, tubercle bacilli not found by bacteriological or histological examination, but tuberculosis confirmed by other methods [inoculation of animals]	TB ovary & tube-oth test
01670	KO	Tuberculosis of other female genital organs, unspecified	TB female gen NEC-unspec
01671	KO	Tuberculosis of other female genital organs, bacteriological or histological examination not done	TB fem gen NEC-no exam
01672	KO	Tuberculosis of other female genital organs, bacteriological or histological examination unknown (at present)	TB fem gen NEC-exam unkn
01673	KO	Tuberculosis of other female genital organs, tubercle bacilli found (in sputum) by microscopy	TB fem gen NEC-micro dx
01674	KO	Tuberculosis of other female genital organs, tubercle bacilli not found (in sputum) by microscopy, but found by bacterial culture	TB fem gen NEC-cult dx
01675	KO	Tuberculosis of other female genital organs, tubercle bacilli not found by bacteriological examination, but tuberculosis confirmed histologically	TB fem gen NEC-histo dx
01676	KO	Tuberculosis of other female genital organs, tubercle bacilli not found by bacteriological or histological examination, but tuberculosis confirmed by other methods [inoculation of animals]	TB fem gen NEC-oth test
01690	KO	Genitourinary tuberculosis, unspecified, unspecified	Gu TB NOS-unspec
01691	KO	Genitourinary tuberculosis, unspecified, bacteriological or histological examination not done	Gu TB NOS-no exam
01692	KO	Genitourinary tuberculosis, unspecified, bacteriological or histological examination unknown (at present)	Gu TB NOS-exam unkn
01693	KO	Genitourinary tuberculosis, unspecified, tubercle bacilli found (in sputum) by microscopy	Gu TB NOS-micro dx
01694	KO	Genitourinary tuberculosis, unspecified, tubercle bacilli not found (in sputum) by microscopy, but found by bacterial culture	Gu TB NOS-cult dx
01695	KO	Genitourinary tuberculosis, unspecified, tubercle bacilli not found by bacteriological examination, but tuberculosis confirmed histologically	Gu TB NOS-histo dx
01696	KO	Genitourinary tuberculosis, unspecified, tubercle bacilli not found by bacteriological or histological examination, but tuberculosis confirmed by other methods [inoculation of animals]	Gu TB NOS-oth test
01700	ICD017	Tuberculosis of skin and subcutaneous cellular tissue, unspecified	TB skin/subcutan-unspec
01701	KO	Tuberculosis of skin and subcutaneous cellular tissue, bacteriological or histological examination not done	TB skin/subcut-no exam
01702	KO	Tuberculosis of skin and subcutaneous cellular tissue, bacteriological or histological examination unknown (at present)	TB skin/subcut-exam unkn
01703	KO	Tuberculosis of skin and subcutaneous cellular tissue, tubercle bacilli found (in sputum) by microscopy	TB skin/subcut-micro dx
01704	KO	Tuberculosis of skin and subcutaneous cellular tissue, tubercle bacilli not found (in sputum) by microscopy, but found by bacterial culture	TB skin/subcut-cult dx
01705	KO	Tuberculosis of skin and subcutaneous cellular tissue, tubercle bacilli not found by bacteriological examination, but tuberculosis confirmed histologically	TB skin/subcut-histo dx
01706	KO	Tuberculosis of skin and subcutaneous cellular tissue, tubercle bacilli not found by bacteriological or histological examination, but tuberculosis confirmed by other methods [inoculation of animals]	TB skin/subcut-oth test
01710	KO	Erythema nodosum with hypersensitivity reaction in tuberculosis, unspecified	Erythema nodos tb-unspec
01711	KO	Erythema nodosum with hypersensitivity reaction in tuberculosis, bacteriological or histological examination not done	Erythem nodos tb-no exam
01712	KO	Erythema nodosum with hypersensitivity reaction in tuberculosis, bacteriological or histological examination unknown (at present)	Erythem nod tb-exam unkn
01713	KO	Erythema nodosum with hypersensitivity reaction in tuberculosis, tubercle bacilli found (in sputum) by microscopy	Erythem nod tb-micro dx
01714	KO	Erythema nodosum with hypersensitivity reaction in tuberculosis, tubercle bacilli not found (in sputum) by microscopy, but found by bacterial culture	Erythem nodos tb-cult dx
01715	KO	Erythema nodosum with hypersensitivity reaction in tuberculosis, tubercle bacilli not found by bacteriological examination, but tuberculosis confirmed histologically	Erythem nod tb-histo dx
01716	KO	Erythema nodosum with hypersensitivity reaction in tuberculosis, tubercle bacilli not found by bacteriological or histological examination, but tuberculosis confirmed by other methods [inoculation of animals]	Erythem nod tb-oth test
01720	KO	Tuberculosis of peripheral lymph nodes, unspecified	TB periph lymph-unspec
01721	KO	Tuberculosis of peripheral lymph nodes, bacteriological or histological examination not done	TB periph lymph-no exam
01722	KO	Tuberculosis of peripheral lymph nodes, bacteriological or histological examination unknown (at present)	TB periph lymph-exam unk
01723	KO	Tuberculosis of peripheral lymph nodes, tubercle bacilli found (in sputum) by microscopy	TB periph lymph-micro dx
01724	KO	Tuberculosis of peripheral lymph nodes, tubercle bacilli not found (in sputum) by microscopy, but found by bacterial culture	TB periph lymph-cult dx
01725	KO	Tuberculosis of peripheral lymph nodes, tubercle bacilli not found by bacteriological examination, but tuberculosis confirmed histologically	TB periph lymph-histo dx
01726	KO	Tuberculosis of peripheral lymph nodes, tubercle bacilli not found by bacteriological or histological examination, but tuberculosis confirmed by other methods [inoculation of animals]	TB periph lymph-oth test
01730	KO	Tuberculosis of eye, unspecified	TB of eye-unspec
01731	KO	Tuberculosis of eye, bacteriological or histological examination not done	TB of eye-no exam
01732	KO	Tuberculosis of eye, bacteriological or histological examination unknown (at present)	TB of eye-exam unkn
01733	KO	Tuberculosis of eye, tubercle bacilli found (in sputum) by microscopy	TB of eye-micro dx
01734	KO	Tuberculosis of eye, tubercle bacilli not found (in sputum) by microscopy, but found by bacterial culture	TB of eye-cult dx
01735	KO	Tuberculosis of eye, tubercle bacilli not found by bacteriological examination, but tuberculosis confirmed histologically	TB of eye-histo dx
01736	KO	Tuberculosis of eye, tubercle bacilli not found by bacteriological or histological examination, but tuberculosis confirmed by other methods [inoculation of animals]	TB of eye-oth test
01740	KO	Tuberculosis of ear, unspecified	TB of ear-unspec
01741	KO	Tuberculosis of ear, bacteriological or histological examination not done	TB of ear-no exam
01742	KO	Tuberculosis of ear, bacteriological or histological examination unknown (at present)	TB of ear-exam unkn
01743	KO	Tuberculosis of ear, tubercle bacilli found (in sputum) by microscopy	TB of ear-micro dx
01744	KO	Tuberculosis of ear, tubercle bacilli not found (in sputum) by microscopy, but found by bacterial culture	TB of ear-cult dx
01745	KO	Tuberculosis of ear, tubercle bacilli not found by bacteriological examination, but tuberculosis confirmed histologically	TB of ear-histo dx
01746	KO	Tuberculosis of ear, tubercle bacilli not found by bacteriological or histological examination, but tuberculosis confirmed by other methods [inoculation of animals]	TB of ear-oth test
01750	KO	Tuberculosis of thyroid gland, unspecified	TB of thyroid-unspec
01751	KO	Tuberculosis of thyroid gland, bacteriological or histological examination not done	TB of thyroid-no exam
01752	KO	Tuberculosis of thyroid gland, bacteriological or histological examination unknown (at present)	TB of thyroid-exam unkn
01753	KO	Tuberculosis of thyroid gland, tubercle bacilli found (in sputum) by microscopy	TB of thyroid-micro dx
01754	KO	Tuberculosis of thyroid gland, tubercle bacilli not found (in sputum) by microscopy, but found by bacterial culture	TB of thyroid-cult dx
01755	KO	Tuberculosis of thyroid gland, tubercle bacilli not found by bacteriological examination, but tuberculosis confirmed histologically	TB of thyroid-histo dx
01756	KO	Tuberculosis of thyroid gland, tubercle bacilli not found by bacteriological or histological examination, but tuberculosis confirmed by other methods [inoculation of animals]	TB of thyroid-oth test
01760	KO	Tuberculosis of adrenal glands, unspecified	TB of adrenal-unspec
01761	KO	Tuberculosis of adrenal glands, bacteriological or histological examination not done	TB of adrenal-no exam
01762	KO	Tuberculosis of adrenal glands, bacteriological or histological examination unknown (at present)	TB of adrenal-exam unkn
01763	KO	Tuberculosis of adrenal glands, tubercle bacilli found (in sputum) by microscopy	TB of adrenal-micro dx
01764	KO	Tuberculosis of adrenal glands, tubercle bacilli not found (in sputum) by microscopy, but found by bacterial culture	TB of adrenal-cult dx
01765	KO	Tuberculosis of adrenal glands, tubercle bacilli not found by bacteriological examination, but tuberculosis confirmed histologically	TB of adrenal-histo dx
01766	KO	Tuberculosis of adrenal glands, tubercle bacilli not found by bacteriological or histological examination, but tuberculosis confirmed by other methods [inoculation of animals]	TB of adrenal-oth test
01770	KO	Tuberculosis of spleen, unspecified	TB of spleen-unspec
01771	KO	Tuberculosis of spleen, bacteriological or histological examination not done	TB of spleen-no exam
01772	KO	Tuberculosis of spleen, bacteriological or histological examination unknown (at present)	TB of spleen-exam unkn
01773	KO	Tuberculosis of spleen, tubercle bacilli found (in sputum) by microscopy	TB of spleen-micro dx
01774	KO	Tuberculosis of spleen, tubercle bacilli not found (in sputum) by microscopy, but found by bacterial culture	TB of spleen-cult dx
01775	KO	Tuberculosis of spleen, tubercle bacilli not found by bacteriological examination, but tuberculosis confirmed histologically	TB of spleen-histo dx
01776	KO	Tuberculosis of spleen, tubercle bacilli not found by bacteriological or histological examination, but tuberculosis confirmed by other methods [inoculation of animals]	TB of spleen-oth test
01780	KO	Tuberculosis of esophagus, unspecified	TB esophagus-unspec
01781	KO	Tuberculosis of esophagus, bacteriological or histological examination not done	TB esophagus-no exam
01782	KO	Tuberculosis of esophagus, bacteriological or histological examination unknown (at present)	TB esophagus-exam unkn
01783	KO	Tuberculosis of esophagus, tubercle bacilli found (in sputum) by microscopy	TB esophagus-micro dx
01784	KO	Tuberculosis of esophagus, tubercle bacilli not found (in sputum) by microscopy, but found by bacterial culture	TB esophagus-cult dx
01785	KO	Tuberculosis of esophagus, tubercle bacilli not found by bacteriological examination, but tuberculosis confirmed histologically	TB esophagus-histo dx
01786	KO	Tuberculosis of esophagus, tubercle bacilli not found by bacteriological or histological examination, but tuberculosis confirmed by other methods [inoculation of animals]	TB esophagus-oth test
01790	KO	Tuberculosis of other specified organs, unspecified	TB of organ NEC-unspec
01791	KO	Tuberculosis of other specified organs, bacteriological or histological examination not done	TB of organ NEC-no exam
01792	KO	Tuberculosis of other specified organs, bacteriological or histological examination unknown (at present)	TB organ NEC-exam unkn
01793	KO	Tuberculosis of other specified organs, tubercle bacilli found (in sputum) by microscopy	TB of organ NEC-micro dx
01794	KO	Tuberculosis of other specified organs, tubercle bacilli not found (in sputum) by microscopy, but found by bacterial culture	TB of organ NEC-cult dx
01795	KO	Tuberculosis of other specified organs, tubercle bacilli not found by bacteriological examination, but tuberculosis confirmed histologically	TB of organ NEC-histo dx
01796	KO	Tuberculosis of other specified organs, tubercle bacilli not found by bacteriological or histological examination, but tuberculosis confirmed by other methods [inoculation of animals]	TB of organ NEC-oth test
01800	ICD018	Acute miliary tuberculosis, unspecified	Acute miliary tb-unspec
01801	KO	Acute miliary tuberculosis, bacteriological or histological examination not done	Acute miliary tb-no exam
01802	KO	Acute miliary tuberculosis, bacteriological or histological examination unknown (at present)	Ac miliary tb-exam unkn
01803	KO	Acute miliary tuberculosis, tubercle bacilli found (in sputum) by microscopy	Ac miliary tb-micro dx
01804	KO	Acute miliary tuberculosis, tubercle bacilli not found (in sputum) by microscopy, but found by bacterial culture	Acute miliary tb-cult dx
01805	KO	Acute miliary tuberculosis, tubercle bacilli not found by bacteriological examination, but tuberculosis confirmed histologically	Ac miliary tb-histo dx
01806	KO	Acute miliary tuberculosis, tubercle bacilli not found by bacteriological or histological examination, but tuberculosis confirmed by other methods [inoculation of animals]	Ac miliary tb-oth test
01880	KO	Other specified miliary tuberculosis, unspecified	Miliary TB NEC-unspec
01881	KO	Other specified miliary tuberculosis, bacteriological or histological examination not done	Miliary TB NEC-no exam
01882	KO	Other specified miliary tuberculosis, bacteriological or histological examination unknown (at present)	Miliary TB NEC-exam unkn
01883	KO	Other specified miliary tuberculosis, tubercle bacilli found (in sputum) by microscopy	Miliary TB NEC-micro dx
01884	KO	Other specified miliary tuberculosis, tubercle bacilli not found (in sputum) by microscopy, but found by bacterial culture	Miliary TB NEC-cult dx
01885	KO	Other specified miliary tuberculosis, tubercle bacilli not found by bacteriological examination, but tuberculosis confirmed histologically	Miliary TB NEC-histo dx
01886	KO	Other specified miliary tuberculosis, tubercle bacilli not found by bacteriological or histological examination, but tuberculosis confirmed by other methods [inoculation of animals]	Miliary TB NEC-oth test
01890	KO	Miliary tuberculosis, unspecified, unspecified	Miliary TB NOS-unspec
01891	KO	Miliary tuberculosis, unspecified, bacteriological or histological examination not done	Miliary TB NOS-no exam
01892	KO	Miliary tuberculosis, unspecified, bacteriological or histological examination unknown (at present)	Miliary TB NOS-exam unkn
01893	KO	Miliary tuberculosis, unspecified, tubercle bacilli found (in sputum) by microscopy	Miliary TB NOS-micro dx
01894	KO	Miliary tuberculosis, unspecified, tubercle bacilli not found (in sputum) by microscopy, but found by bacterial culture	Miliary TB NOS-cult dx
01895	KO	Miliary tuberculosis, unspecified, tubercle bacilli not found by bacteriological examination, but tuberculosis confirmed histologically	Miliary TB NOS-histo dx
01896	KO	Miliary tuberculosis, unspecified, tubercle bacilli not found by bacteriological or histological examination, but tuberculosis confirmed by other methods [inoculation of animals]	Miliary TB NOS-oth test
0200	ICD020	Bubonic plague	Bubonic plague
0201	KO	Cellulocutaneous plague	Cellulocutaneous plague
0202	KO	Septicemic plague	Septicemic plague
0203	KO	Primary pneumonic plague	Primary pneumonic plague
0204	KO	Secondary pneumonic plague	Secondary pneumon plague
0205	KO	Pneumonic plague, unspecified	Pneumonic plague NOS
0208	KO	Other specified types of plague	Other types of plague
0209	KO	Plague, unspecified	Plague NOS
0210	ICD021	Ulceroglandular tularemia	Ulceroglandul tularemia
0211	KO	Enteric tularemia	Enteric tularemia
0212	KO	Pulmonary tularemia	Pulmonary tularemia
0213	KO	Oculoglandular tularemia	Oculoglandular tularemia
0218	KO	Other specified tularemia	Tularemia NEC
0219	KO	Unspecified tularemia	Tularemia NOS
0220	ICD022	Cutaneous anthrax	Cutaneous anthrax
0221	KO	Pulmonary anthrax	Pulmonary anthrax
0222	KO	Gastrointestinal anthrax	Gastrointestinal anthrax
0223	KO	Anthrax septicemia	Anthrax septicemia
0228	KO	Other specified manifestations of anthrax	Other anthrax manifest
0229	KO	Anthrax, unspecified	Anthrax NOS
0230	ICD023	Brucella melitensis	Brucella melitensis
0231	KO	Brucella abortus	Brucella abortus
0232	KO	Brucella suis	Brucella suis
0233	KO	Brucella canis	Brucella canis
0238	KO	Other brucellosis	Brucellosis NEC
0239	KO	Brucellosis, unspecified	Brucellosis NOS
024	ICD024	Glanders	Glanders
025	ICD025	Melioidosis	Melioidosis
0260	ICD026	Spirillary fever	Spirillary fever
0261	KO	Streptobacillary fever	Streptobacillary fever
0269	KO	Unspecified rat-bite fever	Rat-bite fever NOS
0270	ICD027	Listeriosis	Listeriosis
0271	KO	Erysipelothrix infection	Erysipelothrix infection
0272	KO	Pasteurellosis	Pasteurellosis
0278	KO	Other specified zoonotic bacterial diseases	Zoonotic bact dis NEC
0279	KO	Unspecified zoonotic bacterial disease	Zoonotic bact dis NOS
0300	ICD030	Lepromatous leprosy [type L]	Lepromatous leprosy
0301	KO	Tuberculoid leprosy [type T]	Tuberculoid leprosy
0302	KO	Indeterminate leprosy [group I]	Indeterminate leprosy
0303	KO	Borderline leprosy [group B]	Borderline leprosy
0308	KO	Other specified leprosy	Leprosy NEC
0309	KO	Leprosy, unspecified	Leprosy NOS
0310	ICD031	Pulmonary diseases due to other mycobacteria	Pulmonary mycobacteria
0311	KO	Cutaneous diseases due to other mycobacteria	Cutaneous mycobacteria
0312	KO	Disseminated due to other mycobacteria	DMAC bacteremia
0318	KO	Other specified mycobacterial diseases	Mycobacterial dis NEC
0319	KO	Unspecified diseases due to mycobacteria	Mycobacterial dis NOS
0320	ICD032	Faucial diphtheria	Faucial diphtheria
0321	KO	Nasopharyngeal diphtheria	Nasopharynx diphtheria
0322	KO	Anterior nasal diphtheria	Ant nasal diphtheria
0323	KO	Laryngeal diphtheria	Laryngeal diphtheria
03281	KO	Conjunctival diphtheria	Conjunctival diphtheria
03282	KO	Diphtheritic myocarditis	Diphtheritic myocarditis
03283	KO	Diphtheritic peritonitis	Diphtheritic peritonitis
03284	KO	Diphtheritic cystitis	Diphtheritic cystitis
03285	KO	Cutaneous diphtheria	Cutaneous diphtheria
03289	KO	Other specified diphtheria	Diphtheria NEC
0329	KO	Diphtheria, unspecified	Diphtheria NOS
0330	ICD033	Whooping cough due to bordetella pertussis [B. pertussis]	Bordetella pertussis
0331	KO	Whooping cough due to bordetella parapertussis [B. parapertussis]	Bordetella parapertussis
0338	KO	Whooping cough due to other specified organism	Whooping cough NEC
0339	KO	Whooping cough, unspecified organism	Whooping cough NOS
0340	ICD034	Streptococcal sore throat	Strep sore throat
0341	KO	Scarlet fever	Scarlet fever
035	ICD035	Erysipelas	Erysipelas
0360	ICD036	Meningococcal meningitis	Meningococcal meningitis
0361	KO	Meningococcal encephalitis	Meningococc encephalitis
0362	KO	Meningococcemia	Meningococcemia
0363	KO	Waterhouse-Friderichsen syndrome, meningococcal	Meningococc adrenal synd
03640	KO	Meningococcal carditis, unspecified	Meningococc carditis NOS
03641	KO	Meningococcal pericarditis	Meningococc pericarditis
03642	KO	Meningococcal endocarditis	Meningococc endocarditis
03643	KO	Meningococcal myocarditis	Meningococc myocarditis
03681	KO	Meningococcal optic neuritis	Meningococc optic neurit
03682	KO	Meningococcal arthropathy	Meningococc arthropathy
03689	KO	Other specified meningococcal infections	Meningococcal infect NEC
0369	KO	Meningococcal infection, unspecified	Meningococcal infect NOS
037	ICD037	Tetanus	Tetanus
0380	ICD038	Streptococcal septicemia	Streptococcal septicemia
03810	KO	Staphylococcal septicemia, unspecified	Staphylcocc septicem NOS
03811	KO	Methicillin susceptible Staphylococcus aureus septicemia	Meth susc Staph aur sept
03812	KO	Methicillin resistant Staphylococcus aureus septicemia	MRSA septicemia
03819	KO	Other staphylococcal septicemia	Staphylcocc septicem NEC
0382	KO	Pneumococcal septicemia [Streptococcus pneumoniae septicemia]	Pneumococcal septicemia
0383	KO	Septicemia due to anaerobes	Anaerobic septicemia
03840	KO	Septicemia due to gram-negative organism, unspecified	Gram-neg septicemia NOS
03841	KO	Septicemia due to hemophilus influenzae [H. influenzae]	H. influenae septicemia
03842	KO	Septicemia due to escherichia coli [E. coli]	E coli septicemia
03843	KO	Septicemia due to pseudomonas	Pseudomonas septicemia
03844	KO	Septicemia due to serratia	Serratia septicemia
03849	KO	Other septicemia due to gram-negative organisms	Gram-neg septicemia NEC
0388	KO	Other specified septicemias	Septicemia NEC
0389	KO	Unspecified septicemia	Septicemia NOS
0390	ICD039	Cutaneous actinomycotic infection	Cutaneous actinomycosis
0391	KO	Pulmonary actinomycotic infection	Pulmonary actinomycosis
0392	KO	Abdominal actinomycotic infection	Abdominal actinomycosis
0393	KO	Cervicofacial actinomycotic infection	Cervicofac actinomycosis
0394	KO	Madura foot	Madura foot
0398	KO	Actinomycotic infection of other specified sites	Actinomycosis NEC
0399	KO	Actinomycotic infection of unspecified site	Actinomycosis NOS
0400	ICD040	Gas gangrene	Gas gangrene
0401	KO	Rhinoscleroma	Rhinoscleroma
0402	KO	Whipple's disease	Whipple's disease
0403	KO	Necrobacillosis	Necrobacillosis
04041	KO	Infant botulism	Infant botulism
04042	KO	Wound botulism	Wound botulism
04081	KO	Tropical pyomyositis	Tropical pyomyositis
04082	KO	Toxic shock syndrome	Toxic shock syndrome
04089	KO	Other specified bacterial diseases	Bacterial diseases NEC
04100	ICD041	Streptococcus infection in conditions classified elsewhere and of unspecified site, streptococcus, unspecified	Streptococcus unspecf
04101	KO	Streptococcus infection in conditions classified elsewhere and of unspecified site, streptococcus, group A	Streptococcus group a
04102	KO	Streptococcus infection in conditions classified elsewhere and of unspecified site, streptococcus, group B	Streptococcus group b
04103	KO	Streptococcus infection in conditions classified elsewhere and of unspecified site, streptococcus, group C	Streptococcus group c
04104	KO	Streptococcus infection in conditions classified elsewhere and of unspecified site, streptococcus, group D [Enterococcus]	Enterococcus group d
04105	KO	Streptococcus infection in conditions classified elsewhere and of unspecified site, streptococcus, group G	Streptococcus group g
04109	KO	Streptococcus infection in conditions classified elsewhere and of unspecified site, other streptococcus	Other streptococcus
04110	KO	Staphylococcus infection in conditions classified elsewhere and of unspecified site, staphylococcus, unspecified	Staphylococcus unspcfied
04111	KO	Methicillin susceptible Staphylococcus aureus in conditions classified elsewhere and of unspecified site	Mth sus Stph aur els/NOS
04112	KO	Methicillin resistant Staphylococcus aureus in conditions classified elsewhere and of unspecified site	MRSA elsewhere/NOS
04119	KO	Staphylococcus infection in conditions classified elsewhere and of unspecified site, other staphylococcus	Other staphylococcus
0412	KO	Pneumococcus infection in conditions classified elsewhere and of unspecified site	Pneumococcus infect NOS
0413	KO	Friedländer's bacillus infection in conditions classified elsewhere and of unspecified site	Klebsiella pneumoniae
04141	KO	Shiga toxin-producing Escherichia coli [E. coli] (STEC) O157	Shiga txn-produce E.coli
04142	KO	Other specified Shiga toxin-producing Escherichia coli [E. coli] (STEC)	Shga txn prod E.coli NEC
04143	KO	Shiga toxin-producing Escherichia coli [E. coli] (STEC), unspecified	Shga txn prod E.coli NOS
04149	KO	Other and unspecified Escherichia coli [E. coli]	E.coli infection NEC/NOS
0415	KO	Hemophilus influenzae [H. influenzae] infection in conditions classified elsewhere and of unspecified site	H. influenzae infect NOS
0416	KO	Proteus (mirabilis) (morganii) infection in conditions classified elsewhere and of unspecified site	Proteus infection NOS
0417	KO	Pseudomonas infection in conditions classified elsewhere and of unspecified site	Pseudomonas infect NOS
04181	KO	Other specified bacterial infections in conditions classified elsewhere and of unspecified site, mycoplasma	Mycoplasma
04182	KO	Bacteroides fragilis	Bacteroides fragilis
04183	KO	Other specified bacterial infections in conditions classified elsewhere and of unspecified site, Clostridium perfringens	Clostridium perfringens
04184	KO	Other specified bacterial infections in conditions classified elsewhere and of unspecified site, other anaerobes	Other anaerobes
04185	KO	Other specified bacterial infections in conditions classified elsewhere and of unspecified site, other gram-negative organisms	Oth gram negatv bacteria
04186	KO	Helicobacter pylori [H. pylori]	Helicobacter pylori
04189	KO	Other specified bacterial infections in conditions classified elsewhere and of unspecified site, other specified bacteria	Oth specf bacteria
0419	KO	Bacterial infection, unspecified, in conditions classified elsewhere and of unspecified site	Bacterial infection NOS
042	ICD042	Human immunodeficiency virus [HIV] disease	Human immuno virus dis
04500	ICD045	Acute paralytic poliomyelitis specified as bulbar, poliovirus, unspecified type	Ac bulbar polio-type NOS
04501	KO	Acute paralytic poliomyelitis specified as bulbar, poliovirus type I	Ac bulbar polio-type 1
04502	KO	Acute paralytic poliomyelitis specified as bulbar, poliovirus type II	Ac bulbar polio-type 2
04503	KO	Acute paralytic poliomyelitis specified as bulbar, poliovirus type III	Ac bulbar polio-type 3
04510	KO	Acute poliomyelitis with other paralysis, poliovirus, unspecified type	Paral polio NEC-type NOS
04511	KO	Acute poliomyelitis with other paralysis, poliovirus type I	Paral polio NEC-type 1
04512	KO	Acute poliomyelitis with other paralysis, poliovirus type II	Paral polio NEC-type 2
04513	KO	Acute poliomyelitis with other paralysis, poliovirus type III	Paral polio NEC-type 3
04520	KO	Acute nonparalytic poliomyelitis, poliovirus, unspecified type	Nonparaly polio-type NOS
04521	KO	Acute nonparalytic poliomyelitis, poliovirus type I	Nonparalyt polio-type 1
04522	KO	Acute nonparalytic poliomyelitis, poliovirus type II	Nonparalyt polio-type 2
04523	KO	Acute nonparalytic poliomyelitis, poliovirus type III	Nonparalyt polio-type 3
04590	KO	Acute poliomyelitis, unspecified, poliovirus, unspecified type	Ac polio NOS-type NOS
04591	KO	Acute poliomyelitis, unspecified, poliovirus type I	Ac polio NOS-type 1
04592	KO	Acute poliomyelitis, unspecified, poliovirus type II	Ac polio NOS-type 2
04593	KO	Acute poliomyelitis, unspecified, poliovirus type III	Ac polio NOS-type 3
0460	ICD046	Kuru	Kuru
04611	KO	Variant Creutzfeldt-Jakob disease	Varnt Creutzfeldt-Jakob
04619	KO	Other and unspecified Creutzfeldt-Jakob disease	Creutzfldt-Jakob NEC/NOS
0462	KO	Subacute sclerosing panencephalitis	Subac scleros panenceph
0463	KO	Progressive multifocal leukoencephalopathy	Prog multifoc leukoencep
04671	KO	Gerstmann-Sträussler-Scheinker syndrome	Gerstmn-Straus-Schnk syn
04672	KO	Fatal familial insomnia	Fatal familial insomnia
04679	KO	Other and unspecified prion disease of central nervous system	Prion dis of CNS NEC/NOS
0468	KO	Other specified slow virus infection of central nervous system	Cns slow virus infec NEC
0469	KO	Unspecified slow virus infection of central nervous system	Cns slow virus infec NOS
0470	ICD047	Meningitis due to coxsackie virus	Coxsackie virus mening
0471	KO	Meningitis due to echo virus	Echo virus meningitis
0478	KO	Other specified viral meningitis	Viral meningitis NEC
0479	KO	Unspecified viral meningitis	Viral meningitis NOS
048	ICD048	Other enterovirus diseases of central nervous system	Oth enteroviral cns dis
0490	ICD049	Lymphocytic choriomeningitis	Lymphocytic choriomening
0491	KO	Meningitis due to adenovirus	Adenoviral meningitis
0498	KO	Other specified non-arthropod-borne viral diseases of central nervous system	Viral encephalitis NEC
0499	KO	Unspecified non-arthropod-borne viral diseases of central nervous system	Viral encephalitis NOS
0500	ICD050	Variola major	Variola major
0501	KO	Alastrim	Alastrim
0502	KO	Modified smallpox	Modified smallpox
0509	KO	Smallpox, unspecified	Smallpox NOS
05101	KO	Cowpox	Cowpox
05102	KO	Vaccinia not from vaccination	Vaccinia n/f vaccination
0511	KO	Pseudocowpox	Pseudocowpox
0512	KO	Contagious pustular dermatitis	Contagious pustular derm
0519	KO	Paravaccinia, unspecified	Paravaccinia NOS
0520	ICD052	Postvaricella encephalitis	Postvaricella encephalit
0521	KO	Varicella (hemorrhagic) pneumonitis	Varicella pneumonitis
0522	KO	Postvaricella myelitis	Postvaricella myelitis
0527	KO	Chickenpox with other specified complications	Varicella complicat NEC
0528	KO	Chickenpox with unspecified complication	Varicella complicat NOS
0529	KO	Varicella without mention of complication	Varicella uncomplicated
0530	ICD053	Herpes zoster with meningitis	Herpes zoster meningitis
05310	KO	Herpes zoster with unspecified nervous system complication	H zoster nerv syst NOS
05311	KO	Geniculate herpes zoster	Geniculate herpes zoster
05312	KO	Postherpetic trigeminal neuralgia	Postherpes trigem neural
05313	KO	Postherpetic polyneuropathy	Postherpes polyneuropath
05314	KO	Herpes zoster myelitis	Herpes zoster myelitis
05319	KO	Herpes zoster with other nervous system complications	H zoster nerv syst NEC
05320	KO	Herpes zoster dermatitis of eyelid	Herpes zoster of eyelid
05321	KO	Herpes zoster keratoconjunctivitis	H zoster keratoconjunct
05322	KO	Herpes zoster iridocyclitis	H zoster iridocyclitis
05329	KO	Herpes zoster with other ophthalmic complications	Herpes zoster of eye NEC
05371	KO	Otitis externa due to herpes zoster	H zoster otitis externa
05379	KO	Herpes zoster with other specified complications	H zoster complicated NEC
0538	KO	Herpes zoster with unspecified complication	H zoster complicated NOS
0539	KO	Herpes zoster without mention of complication	Herpes zoster NOS
0540	ICD054	Eczema herpeticum	Eczema herpeticum
05410	KO	Genital herpes, unspecified	Genital herpes NOS
05411	KO	Herpetic vulvovaginitis	Herpetic vulvovaginitis
05412	KO	Herpetic ulceration of vulva	Herpetic ulcer of vulva
05413	KO	Herpetic infection of penis	Herpetic infect of penis
05419	KO	Other genital herpes	Genital herpes NEC
0542	KO	Herpetic gingivostomatitis	Herpetic gingivostomat
0543	KO	Herpetic meningoencephalitis	Herpetic encephalitis
05440	KO	Herpes simplex with unspecified ophthalmic complication	Herpes simplex eye NOS
05441	KO	Herpes simplex dermatitis of eyelid	Herpes simplex of eyelid
05442	KO	Dendritic keratitis	Dendritic keratitis
05443	KO	Herpes simplex disciform keratitis	H simplex keratitis
05444	KO	Herpes simplex iridocyclitis	H simplex iridocyclitis
05449	KO	Herpes simplex with other ophthalmic complications	Herpes simplex eye NEC
0545	KO	Herpetic septicemia	Herpetic septicemia
0546	KO	Herpetic whitlow	Herpetic whitlow
05471	KO	Visceral herpes simplex	Visceral herpes simplex
05472	KO	Herpes simplex meningitis	H simplex meningitis
05473	KO	Herpes simplex otitis externa	H simplex otitis externa
05474	KO	Herpes simplex myelitis	Herpes simplex myelitis
05479	KO	Herpes simplex with other specified complications	H simplex complicat NEC
0548	KO	Herpes simplex with unspecified complication	H simplex complicat NOS
0549	KO	Herpes simplex without mention of complication	Herpes simplex NOS
0550	ICD055	Postmeasles encephalitis	Postmeasles encephalitis
0551	KO	Postmeasles pneumonia	Postmeasles pneumonia
0552	KO	Postmeasles otitis media	Postmeasles otitis media
05571	KO	Measles keratoconjunctivitis	Measles keratitis
05579	KO	Measles with other specified complications	Measles complication NEC
0558	KO	Measles with unspecified complication	Measles complication NOS
0559	KO	Measles without mention of complication	Measles uncomplicated
05600	ICD056	Rubella with unspecified neurological complication	Rubella nerve compl NOS
05601	KO	Encephalomyelitis due to rubella	Rubella encephalitis
05609	KO	Rubella with other neurological complications	Rubella nerve compl NEC
05671	KO	Arthritis due to rubella	Arthritis due to rubella
05679	KO	Rubella with other specified complications	Rubella complication NEC
0568	KO	Rubella with unspecified complications	Rubella complication NOS
0569	KO	Rubella without mention of complication	Rubella uncomplicated
0570	ICD057	Erythema infectiosum (fifth disease)	Erythema infectiosum
0578	KO	Other specified viral exanthemata	Viral exanthemata NEC
0579	KO	Viral exanthem, unspecified	Viral exanthemata NOS
05810	KO	Roseola infantum, unspecified	Roseola infantum NOS
05811	KO	Roseola infantum due to human herpesvirus 6	Roseola infant d/t HHV-6
05812	KO	Roseola infantum due to human herpesvirus 7	Roseola infant d/t HHV-7
05821	KO	Human herpesvirus 6 encephalitis	Human herpesvir 6 enceph
05829	KO	Other human herpesvirus encephalitis	Human herpesvr encph NEC
05881	KO	Human herpesvirus 6 infection	Human herpesvirus 6 infc
05882	KO	Human herpesvirus 7 infection	Human herpesvirus 7 infc
05889	KO	Other human herpesvirus infection	Human herpesvirs inf NEC
05900	ICD059	Orthopoxvirus infection, unspecified	Orthopoxvirus infect NOS
05901	KO	Monkeypox	Monkeypox
05909	KO	Other orthopoxvirus infections	Orthopoxvirus infect NEC
05910	KO	Parapoxvirus infection, unspecified	Parapoxvirus infectn NOS
05911	KO	Bovine stomatitis	Bovine stomatitis
05912	KO	Sealpox	Sealpox
05919	KO	Other parapoxvirus infections	Parapoxvirus infectn NEC
05920	KO	Yatapoxvirus infection, unspecified	Yatapoxvirus infectn NOS
05921	KO	Tanapox	Tanapox
05922	KO	Yaba monkey tumor virus	Yaba monkey tumor virus
0598	KO	Other poxvirus infections	Poxvirus infections NEC
0599	KO	Poxvirus infections, unspecified	Poxvirus infection NOS
0600	ICD060	Sylvatic yellow fever	Sylvatic yellow fever
0601	KO	Urban yellow fever	Urban yellow fever
0609	KO	Yellow fever, unspecified	Yellow fever NOS
061	ICD061	Dengue	Dengue
0620	ICD062	Japanese encephalitis	Japanese encephalitis
0621	KO	Western equine encephalitis	West equine encephalitis
0622	KO	Eastern equine encephalitis	East equine encephalitis
0623	KO	St. Louis encephalitis	St Louis encephalitis
0624	KO	Australian encephalitis	Australian encephalitis
0625	KO	California virus encephalitis	California encephalitis
0628	KO	Other specified mosquito-borne viral encephalitis	Mosquit-borne enceph NEC
0629	KO	Mosquito-borne viral encephalitis, unspecified	Mosquit-borne enceph NOS
0630	ICD063	Russian spring-summer [taiga] encephalitis	Russia spr-summer enceph
0631	KO	Louping ill	Louping ill
0632	KO	Central european encephalitis	Cent Europe encephalitis
0638	KO	Other specified tick-borne viral encephalitis	Tick-borne enceph NEC
0639	KO	Tick-borne viral encephalitis, unspecified	Tick-borne enceph NOS
064	ICD064	Viral encephalitis transmitted by other and unspecified arthropods	Vir enceph arthropod NEC
0650	ICD065	Crimean hemorrhagic fever [CHF Congo virus]	Crimean hemorrhagic fev
0651	KO	Omsk hemorrhagic fever	Omsk hemorrhagic fever
0652	KO	Kyasanur forest disease	Kyasanur forest disease
0653	KO	Other tick-borne hemorrhagic fever	Tick-borne hem fever NEC
0654	KO	Mosquito-borne hemorrhagic fever	Mosquito-borne hem fever
0658	KO	Other specified arthropod-borne hemorrhagic fever	Arthropod hem fever NEC
0659	KO	Arthropod-borne hemorrhagic fever, unspecified	Arthropod hem fever NOS
0660	ICD066	Phlebotomus fever	Phlebotomus fever
0661	KO	Tick-borne fever	Tick-borne fever
0662	KO	Venezuelan equine fever	Venezuelan equine fever
0663	KO	Other mosquito-borne fever	Mosquito-borne fever NEC
06640	KO	West Nile Fever, unspecified	West Nile Fever NOS
06641	KO	West Nile Fever with encephalitis	West Nile Fever w/enceph
06642	KO	West Nile Fever with other neurologic manifestation	West Nile neuro man NEC
06649	KO	West Nile Fever with other complications	West Nile w complic NEC
0668	KO	Other specified arthropod-borne viral diseases	Arthropod virus NEC
0669	KO	Arthropod-borne viral disease, unspecified	Arthropod virus NOS
0700	ICD070	Viral hepatitis A with hepatic coma	Hepatitis A with coma
0701	KO	Viral hepatitis A without mention of hepatic coma	Hepatitis A w/o coma
07020	KO	Viral hepatitis B with hepatic coma, acute or unspecified, without mention of hepatitis delta	Hpt B acte coma wo dlta
07021	KO	Viral hepatitis B with hepatic coma, acute or unspecified, with hepatitis delta	Hpt B acte coma w dlta
07022	KO	Chronic viral hepatitis B with hepatic coma without hepatitis delta	Hpt B chrn coma wo dlta
07023	KO	Chronic viral hepatitis B with hepatic coma with hepatitis delta	Hpt B chrn coma w dlta
07030	KO	Viral hepatitis B without mention of hepatic coma, acute or unspecified, without mention of hepatitis delta	Hpt B acte wo cm wo dlta
07031	KO	Viral hepatitis B without mention of hepatic coma, acute or unspecified, with hepatitis delta	Hpt B acte wo cm w dlta
07032	KO	Chronic viral hepatitis B without mention of hepatic coma without mention of hepatitis delta	Hpt B chrn wo cm wo dlta
07033	KO	Chronic viral hepatitis B without mention of hepatic coma with hepatitis delta	Hpt B chrn wo cm w dlta
07041	KO	Acute hepatitis C with hepatic coma	Hpt C acute w hepat Coma
07042	KO	Hepatitis delta without mention of active hepatitis B disease with hepatic coma	Hpt dlt wo b w hpt coma
07043	KO	Hepatitis E with hepatic coma	Hpt E w hepat Coma
07044	KO	Chronic hepatitis C with hepatic coma	Chrnc hpt C w hepat Coma
07049	KO	Other specified viral hepatitis with hepatic coma	Oth vrl hepat w hpt coma
07051	KO	Acute hepatitis C without mention of hepatic coma	Hpt C acute wo hpat coma
07052	KO	Hepatitis delta without mention of active hepatitis B disease or hepatic coma	Hpt dlt wo b wo hpt coma
07053	KO	Hepatitis E without mention of hepatic coma	Hpt E wo hepat Coma
07054	KO	Chronic hepatitis C without mention of hepatic coma	Chrnc hpt C wo hpat coma
07059	KO	Other specified viral hepatitis without mention of hepatic coma	Oth vrl hpat wo hpt coma
0706	KO	Unspecified viral hepatitis with hepatic coma	Viral hepat NOS w coma
07070	KO	Unspecified viral hepatitis C without hepatic coma	Hpt C w/o hepat coma NOS
07071	KO	Unspecified viral hepatitis C with hepatic coma	Hpt C w hepatic coma NOS
0709	KO	Unspecified viral hepatitis without mention of hepatic coma	Viral hepat NOS w/o coma
071	ICD071	Rabies	Rabies
0720	ICD072	Mumps orchitis	Mumps orchitis
0721	KO	Mumps meningitis	Mumps meningitis
0722	KO	Mumps encephalitis	Mumps encephalitis
0723	KO	Mumps pancreatitis	Mumps pancreatitis
07271	KO	Mumps hepatitis	Mumps hepatitis
07272	KO	Mumps polyneuropathy	Mumps polyneuropathy
07279	KO	Other mumps with other specified complications	Mumps complication NEC
0728	KO	Mumps with unspecified complication	Mumps complication NOS
0729	KO	Mumps without mention of complication	Mumps uncomplicated
0730	ICD073	Ornithosis with pneumonia	Ornithosis pneumonia
0737	KO	Ornithosis with other specified complications	Ornithosis complicat NEC
0738	KO	Ornithosis with unspecified complication	Ornithosis complicat NOS
0739	KO	Ornithosis, unspecified	Ornithosis NOS
0740	ICD074	Herpangina	Herpangina
0741	KO	Epidemic pleurodynia	Epidemic pleurodynia
07420	KO	Coxsackie carditis, unspecified	Coxsackie carditis NOS
07421	KO	Coxsackie pericarditis	Coxsackie pericarditis
07422	KO	Coxsackie endocarditis	Coxsackie endocarditis
07423	KO	Coxsackie myocarditis	Coxsackie myocarditis
0743	KO	Hand, foot, and mouth disease	Hand, foot & mouth dis
0748	KO	Other specified diseases due to Coxsackie virus	Coxsackie virus NEC
075	ICD075	Infectious mononucleosis	Infectious mononucleosis
0760	ICD076	Trachoma, initial stage	Trachoma, initial stage
0761	KO	Trachoma, active stage	Trachoma, active stage
0769	KO	Trachoma, unspecified	Trachoma NOS
0770	ICD077	Inclusion conjunctivitis	Inclusion conjunctivitis
0771	KO	Epidemic keratoconjunctivitis	Epidem keratoconjunctiv
0772	KO	Pharyngoconjunctival fever	Pharyngoconjunct fever
0773	KO	Other adenoviral conjunctivitis	Adenoviral conjunct NEC
0774	KO	Epidemic hemorrhagic conjunctivitis	Epidem hem conjunctivit
0778	KO	Other viral conjunctivitis	Viral conjunctivitis NEC
07798	KO	Unspecified diseases of conjunctiva due to chlamydiae	Unsp ds conjuc chlamydia
07799	KO	Unspecified diseases of conjunctiva due to viruses	Unsp ds conjuc viruses
0780	ICD078	Molluscum contagiosum	Molluscum contagiosum
07810	KO	Viral warts, unspecified	Viral warts NOS
07811	KO	Condyloma acuminatum	Condyloma acuminatum
07812	KO	Plantar wart	Plantar wart
07819	KO	Other specified viral warts	Oth specfd viral warts
0782	KO	Sweating fever	Sweating fever
0783	KO	Cat-scratch disease	Cat-scratch disease
0784	KO	Foot and mouth disease	Foot & mouth disease
0785	KO	Cytomegaloviral disease	Cytomegaloviral disease
0786	KO	Hemorrhagic nephrosonephritis	Hem nephrosonephritis
0787	KO	Arenaviral hemorrhagic fever	Arenaviral hem fever
07881	KO	Epidemic vertigo	Epidemic vertigo
07882	KO	Epidemic vomiting syndrome	Epidemic vomiting synd
07888	KO	Other specified diseases due to chlamydiae	Oth spec dis chlamydiae
07889	KO	Other specified diseases due to viruses	Oth spec dis viruses
0790	ICD079	Adenovirus infection in conditions classified elsewhere and of unspecified site	Adenovirus infect NOS
0791	KO	Echo virus infection in conditions classified elsewhere and of unspecified site	Echo virus infect NOS
0792	KO	Coxsackie virus infection in conditions classified elsewhere and of unspecified site	Coxsackie virus inf NOS
0793	KO	Rhinovirus infection in conditions classified elsewhere and of unspecified site	Rhinovirus infect NOS
0794	KO	Human papillomavirus in conditions classified elsewhere and of unspecified site	Human papillomavirus
07950	KO	Retrovirus, unspecified	Retrovirus, unspecified
07951	KO	Human T-cell lymphotrophic virus, type I [HTLV-I]	Htlv-1 infection oth dis
07952	KO	Human T-cell lymphotrophic virus, type II [HTLV-II]	Htlv-ii infectn oth dis
07953	KO	Human immunodeficiency virus, type 2 [HIV-2]	Hiv-2 infection oth dis
07959	KO	Other specified retrovirus	Oth specfied retrovirus
0796	KO	Respiratory syncytial virus (RSV)	Resprtry syncytial virus
07981	KO	Hantavirus infection	Hantavirus infection
07982	KO	SARS-associated coronavirus	SARS assoc coronavirus
07983	KO	Parvovirus B19	Parvovirus B19
07988	KO	Other specified chlamydial infection	Oth spcf chlamydial infc
07989	KO	Other specified viral infection	Oth specf viral infectn
07998	KO	Unspecified chlamydial infection	Chlamydial infection NOS
07999	KO	Unspecified viral infection	Viral infection NOS
080	ICD080	Louse-borne (epidemic) typhus	Louse-borne typhus
0810	ICD081	Murine (endemic) typhus	Murine typhus
0811	KO	Brill's disease	Brill's disease
0812	KO	Scrub typhus	Scrub typhus
0819	KO	Typhus, unspecified	Typhus NOS
0820	ICD082	Spotted fevers	Spotted fevers
0821	KO	Boutonneuse fever	Boutonneuse fever
0822	KO	North Asian tick fever	North asian tick fever
0823	KO	Queensland tick typhus	Queensland tick typhus
08240	KO	Ehrlichiosis, unspecified	Ehrlichiosis NOS
08241	KO	Ehrlichiosis chafeensis [E. chafeensis]	Ehrlichiosis chafeensis
08249	KO	Other ehrlichiosis	Ehrlichiosis NEC
0828	KO	Other specified tick-borne rickettsioses	Tick-borne ricketts NEC
0829	KO	Tick-borne rickettsiosis, unspecified	Tick-borne ricketts NOS
0830	ICD083	Q fever	Q fever
0831	KO	Trench fever	Trench fever
0832	KO	Rickettsialpox	Rickettsialpox
0838	KO	Other specified rickettsioses	Rickettsioses NEC
0839	KO	Rickettsiosis, unspecified	Rickettsiosis NOS
0840	ICD084	Falciparum malaria [malignant tertian]	Falciparum malaria
0841	KO	Vivax malaria [benign tertian]	Vivax malaria
0842	KO	Quartan malaria	Quartan malaria
0843	KO	Ovale malaria	Ovale malaria
0844	KO	Other malaria	Malaria NEC
0845	KO	Mixed malaria	Mixed malaria
0846	KO	Malaria, unspecified	Malaria NOS
0847	KO	Induced malaria	Induced malaria
0848	KO	Blackwater fever	Blackwater fever
0849	KO	Other pernicious complications of malaria	Malaria complicated NEC
0850	ICD085	Visceral [kala-azar] leishmaniasis	Visceral leishmaniasis
0851	KO	Cutaneous leishmaniasis, urban	Cutan leishmanias urban
0852	KO	Cutaneous leishmaniasis, Asian desert	Cutan leishmanias asian
0853	KO	Cutaneous leishmaniasis, Ethiopian	Cutan leishmanias ethiop
0854	KO	Cutaneous leishmaniasis, American	Cutan leishmanias amer
0855	KO	Mucocutaneous leishmaniasis, (American)	Mucocutan leishmaniasis
0859	KO	Leishmaniasis, unspecified	Leishmaniasis NOS
0860	ICD086	Chagas' disease with heart involvement	Chagas disease of heart
0861	KO	Chagas' disease with other organ involvement	Chagas dis of oth organ
0862	KO	Chagas' disease without mention of organ involvement	Chagas disease NOS
0863	KO	Gambian trypanosomiasis	Gambian trypanosomiasis
0864	KO	Rhodesian trypanosomiasis	Rhodesian trypanosomias
0865	KO	African trypanosomiasis, unspecified	African trypanosoma NOS
0869	KO	Trypanosomiasis, unspecified	Trypanosomiasis NOS
0870	ICD087	Relapsing fever, louse-borne	Louse-borne relaps fever
0871	KO	Relapsing fever, tick-borne	Tick-borne relaps fever
0879	KO	Relapsing fever, unspecified	Relapsing fever NOS
0880	ICD088	Bartonellosis	Bartonellosis
08881	KO	Lyme Disease	Lyme disease
08882	KO	Babesiosis	Babesiosis
08889	KO	Other specified arthropod-borne diseases, other	Oth arthropod-borne dis
0889	KO	Arthropod-borne disease, unspecified	Arthropod-borne dis NOS
0900	ICD090	Early congenital syphilis, symptomatic	Early cong syph symptom
0901	KO	Early congenital syphilis, latent	Early congen syph latent
0902	KO	Early congenital syphilis, unspecified	Early congen syph NOS
0903	KO	Syphilitic interstitial keratitis	Syphilitic keratitis
09040	KO	Juvenile neurosyphilis, unspecified	Juvenile neurosyph NOS
09041	KO	Congenital syphilitic encephalitis	Congen syph encephalitis
09042	KO	Congenital syphilitic meningitis	Congen syph meningitis
09049	KO	Other juvenile neurosyphilis	Juvenile neurosyph NEC
0905	KO	Other late congenital syphilis, symptomatic	Late congen syph symptom
0906	KO	Late congenital syphilis, latent	Late congen syph latent
0907	KO	Late congenital syphilis, unspecified	Late congen syph NOS
0909	KO	Congenital syphilis, unspecified	Congenital syphilis NOS
0910	ICD091	Genital syphilis (primary)	Primary genital syphilis
0911	KO	Primary anal syphilis	Primary anal syphilis
0912	KO	Other primary syphilis	Primary syphilis NEC
0913	KO	Secondary syphilis of skin or mucous membranes	Secondary syph skin
0914	KO	Adenopathy due to secondary syphilis	Syphilitic adenopathy
09150	KO	Syphilitic uveitis, unspecified	Syphilitic uveitis NOS
09151	KO	Syphilitic chorioretinitis (secondary)	Syphilit chorioretinitis
09152	KO	Syphilitic iridocyclitis (secondary)	Syphilitic iridocyclitis
09161	KO	Secondary syphilitic periostitis	Syphilitic periostitis
09162	KO	Secondary syphilitic hepatitis	Syphilitic hepatitis
09169	KO	Secondary syphilis of other viscera	Second syph viscera NEC
0917	KO	Secondary syphilis, relapse	Second syphilis relapse
09181	KO	Acute syphilitic meningitis (secondary)	Acute syphil meningitis
09182	KO	Syphilitic alopecia	Syphilitic alopecia
09189	KO	Other forms of secondary syphilis	Secondary syphilis NEC
0919	KO	Unspecified secondary syphilis	Secondary syphilis NOS
0920	ICD092	Early syphilis, latent, serological relapse after treatment	Early syph latent relaps
0929	KO	Early syphilis, latent, unspecified	Early syphil latent NOS
0930	ICD093	Aneurysm of aorta, specified as syphilitic	Aortic aneurysm, syphil
0931	KO	Syphilitic aortitis	Syphilitic aortitis
09320	KO	Syphilitic endocarditis of valve, unspecified	Syphil endocarditis NOS
09321	KO	Syphilitic endocarditis of mitral valve	Syphilitic mitral valve
09322	KO	Syphilitic endocarditis of aortic valve	Syphilitic aortic valve
09323	KO	Syphilitic endocarditis of tricuspid valve	Syphil tricuspid valve
09324	KO	Syphilitic endocarditis of pulmonary valve	Syphil pulmonary valve
09381	KO	Syphilitic pericarditis	Syphilitic pericarditis
09382	KO	Syphilitic myocarditis	Syphilitic myocarditis
09389	KO	Other specified cardiovascular syphilis	Cardiovascular syph NEC
0939	KO	Cardiovascular syphilis, unspecified	Cardiovascular syph NOS
0940	ICD094	Tabes dorsalis	Tabes dorsalis
0941	KO	General paresis	General paresis
0942	KO	Syphilitic meningitis	Syphilitic meningitis
0943	KO	Asymptomatic neurosyphilis	Asymptomat neurosyphilis
09481	KO	Syphilitic encephalitis	Syphilitic encephalitis
09482	KO	Syphilitic parkinsonism	Syphilitic parkinsonism
09483	KO	Syphilitic disseminated retinochoroiditis	Syph dissem retinitis
09484	KO	Syphilitic optic atrophy	Syphilitic optic atrophy
09485	KO	Syphilitic retrobulbar neuritis	Syph retrobulb neuritis
09486	KO	Syphilitic acoustic neuritis	Syphil acoustic neuritis
09487	KO	Syphilitic ruptured cerebral aneurysm	Syph rupt cereb aneurysm
09489	KO	Other specified neurosyphilis	Neurosyphilis NEC
0949	KO	Neurosyphilis, unspecified	Neurosyphilis NOS
0950	ICD095	Syphilitic episcleritis	Syphilitic episcleritis
0951	KO	Syphilis of lung	Syphilis of lung
0952	KO	Syphilitic peritonitis	Syphilitic peritonitis
0953	KO	Syphilis of liver	Syphilis of liver
0954	KO	Syphilis of kidney	Syphilis of kidney
0955	KO	Syphilis of bone	Syphilis of bone
0956	KO	Syphilis of muscle	Syphilis of muscle
0957	KO	Syphilis of synovium, tendon, and bursa	Syphilis of tendon/bursa
0958	KO	Other specified forms of late symptomatic syphilis	Late sympt syphilis NEC
0959	KO	Late symptomatic syphilis, unspecified	Late sympt syphilis NOS
096	ICD096	Late syphilis, latent	Late syphilis latent
0970	ICD097	Late syphilis, unspecified	Late syphilis NOS
0971	KO	Latent syphilis, unspecified	Latent syphilis NOS
0979	KO	Syphilis, unspecified	Syphilis NOS
0980	ICD098	Gonococcal infection (acute) of lower genitourinary tract	Acute gc infect lower gu
09810	KO	Gonococcal infection (acute) of upper genitourinary tract, site unspecified	Gc (acute) upper gu NOS
09811	KO	Gonococcal cystitis (acute)	Gc cystitis (acute)
09812	KO	Gonococcal prostatitis (acute)	Gc prostatitis (acute)
09813	KO	Gonococcal epididymo-orchitis (acute)	Gc orchitis (acute)
09814	KO	Gonococcal seminal vesiculitis (acute)	Gc sem vesiculit (acute)
09815	KO	Gonococcal cervicitis (acute)	Gc cervicitis (acute)
09816	KO	Gonococcal endometritis (acute)	Gc endometritis (acute)
09817	KO	Gonococcal salpingitis, specified as acute	Acute gc salpingitis
09819	KO	Other gonococcal infection (acute) of upper genitourinary tract	Gc (acute) upper gu NEC
0982	KO	Gonococcal infection, chronic, of lower genitourinary tract	Chr gc infect lower gu
09830	KO	Chronic gonococcal infection of upper genitourinary tract, site unspecified	Chr gc upper gu NOS
09831	KO	Gonococcal cystitis, chronic	Gc cystitis, chronic
09832	KO	Gonococcal prostatitis, chronic	Gc prostatitis, chronic
09833	KO	Gonococcal epididymo-orchitis, chronic	Gc orchitis, chronic
09834	KO	Gonococcal seminal vesiculitis, chronic	Gc sem vesiculitis, chr
09835	KO	Gonococcal cervicitis, chronic	Gc cervicitis, chronic
09836	KO	Gonococcal endometritis, chronic	Gc endometritis, chronic
09837	KO	Gonococcal salpingitis (chronic)	Gc salpingitis (chronic)
09839	KO	Other chronic gonococcal infection of upper genitourinary tract	Chr gc upper gu NEC
09840	KO	Gonococcal conjunctivitis (neonatorum)	Gonococcal conjunctivit
09841	KO	Gonococcal iridocyclitis	Gonococcal iridocyclitis
09842	KO	Gonococcal endophthalmia	Gonococcal endophthalmia
09843	KO	Gonococcal keratitis	Gonococcal keratitis
09849	KO	Other gonococcal infection of eye	Gonococcal eye NEC
09850	KO	Gonococcal arthritis	Gonococcal arthritis
09851	KO	Gonococcal synovitis and tenosynovitis	Gonococcal synovitis
09852	KO	Gonococcal bursitis	Gonococcal bursitis
09853	KO	Gonococcal spondylitis	Gonococcal spondylitis
09859	KO	Other gonococcal infection of joint	Gc infect joint NEC
0986	KO	Gonococcal infection of pharynx	Gonococcal infec pharynx
0987	KO	Gonococcal infection of anus and rectum	Gc infect anus & rectum
09881	KO	Gonococcal keratosis (blennorrhagica)	Gonococcal keratosis
09882	KO	Gonococcal meningitis	Gonococcal meningitis
09883	KO	Gonococcal pericarditis	Gonococcal pericarditis
09884	KO	Gonococcal endocarditis	Gonococcal endocarditis
09885	KO	Other gonococcal heart disease	Gonococcal heart dis NEC
09886	KO	Gonococcal peritonitis	Gonococcal peritonitis
09889	KO	Gonococcal infection of other specified sites	Gonococcal inf site NEC
0990	ICD099	Chancroid	Chancroid
0991	KO	Lymphogranuloma venereum	Lymphogranuloma venereum
0992	KO	Granuloma inguinale	Granuloma inguinale
0993	KO	Reiter's disease	Reiter's disease
09940	KO	Other nongonococcal urethritis, unspecified	Unspcf nongnccl urethrts
09941	KO	Other nongonococcal urethritis, chlamydia trachomatis	Chlmyd trachomatis ureth
09949	KO	Other nongonococcal urethritis, other specified organism	Nongc urth oth spf orgsm
09950	KO	Other venereal diseases due to chlamydia trachomatis, unspecified site	Oth VD chlm trch unsp st
09951	KO	Other venereal diseases due to chlamydia trachomatis, pharynx	Oth VD chlm trch pharynx
09952	KO	Other venereal diseases due to chlamydia trachomatis, anus and rectum	Oth VD chlm trch ans rct
09953	KO	Other venereal diseases due to chlamydia trachomatis, lower genitourinary sites	Oth VD chlm trch lowr gu
09954	KO	Other venereal diseases due to chlamydia trachomatis, other genitourinary sites	Oth VD chlm trch oth gu
09955	KO	Other venereal diseases due to chlamydia trachomatis, unspecified genitourinary site	Ot VD chlm trch unspf gu
09956	KO	Other venereal diseases due to chlamydia trachomatis, peritoneum	Ot VD chlm trch prtoneum
09959	KO	Other venereal diseases due to chlamydia trachomatis, other specified site	Oth VD chlm trch spcf st
0998	KO	Other specified venereal diseases	Venereal disease NEC
0999	KO	Venereal disease, unspecified	Venereal disease NOS
1000	ICD100	Leptospirosis icterohemorrhagica	Leptospiros icterohem
10081	KO	Leptospiral meningitis (aseptic)	Leptospiral meningitis
10089	KO	Other specified leptospiral infections	Leptospiral infect NEC
1009	KO	Leptospirosis, unspecified	Leptospirosis NOS
101	ICD101	Vincent's angina	Vincent's angina
1020	ICD102	Initial lesions of yaws	Initial lesions yaws
1021	KO	Multiple papillomata due to yaws and wet crab yaws	Multiple papillomata
1022	KO	Other early skin lesions of yaws	Early skin yaws NEC
1023	KO	Hyperkeratosis due to yaws	Hyperkeratosis of yaws
1024	KO	Gummata and ulcers due to yaws	Gummata and ulcers, yaws
1025	KO	Gangosa	Gangosa
1026	KO	Bone and joint lesions due to yaws	Yaws of bone & joint
1027	KO	Other manifestations of yaws	Yaws manifestations NEC
1028	KO	Latent yaws	Latent yaws
1029	KO	Yaws, unspecified	Yaws NOS
1030	ICD103	Primary lesions of pinta	Pinta primary lesions
1031	KO	Intermediate lesions of pinta	Pinta intermed lesions
1032	KO	Late lesions of pinta	Pinta late lesions
1033	KO	Mixed lesions of pinta	Pinta mixed lesions
1039	KO	Pinta, unspecified	Pinta NOS
1040	ICD104	Nonvenereal endemic syphilis	Nonvenereal endemic syph
1048	KO	Other specified spirochetal infections	Spirochetal infect NEC
1049	KO	Spirochetal infection, unspecified	Spirochetal infect NOS
1100	ICD110	Dermatophytosis of scalp and beard	Dermatophyt scalp/beard
1101	KO	Dermatophytosis of nail	Dermatophytosis of nail
1102	KO	Dermatophytosis of hand	Dermatophytosis of hand
1103	KO	Dermatophytosis of groin and perianal area	Dermatophytosis of groin
1104	KO	Dermatophytosis of foot	Dermatophytosis of foot
1105	KO	Dermatophytosis of the body	Dermatophytosis of body
1106	KO	Deep seated dermatophytosis	Deep dermatophytosis
1108	KO	Dermatophytosis of other specified sites	Dermatophytosis site NEC
1109	KO	Dermatophytosis of unspecified site	Dermatophytosis site NOS
1110	ICD111	Pityriasis versicolor	Pityriasis versicolor
1111	KO	Tinea nigra	Tinea nigra
1112	KO	Tinea blanca	Tinea blanca
1113	KO	Black piedra	Black piedra
1118	KO	Other specified dermatomycoses	Dermatomycoses NEC
1119	KO	Dermatomycosis, unspecified	Dermatomycosis NOS
1120	ICD112	Candidiasis of mouth	Thrush
1121	KO	Candidiasis of vulva and vagina	Candidal vulvovaginitis
1122	KO	Candidiasis of other urogenital sites	Candidias urogenital NEC
1123	KO	Candidiasis of skin and nails	Cutaneous candidiasis
1124	KO	Candidiasis of lung	Candidiasis of lung
1125	KO	Disseminated candidiasis	Disseminated candidiasis
11281	KO	Candidal endocarditis	Candidal endocarditis
11282	KO	Candidal otitis externa	Candidal otitis externa
11283	KO	Candidal meningitis	Candidal meningitis
11284	KO	Candidal esophagitis	Candidal esophagitis
11285	KO	Candidal enteritis	Candidal enteritis
11289	KO	Other candidiasis of other specified sites	Candidiasis site NEC
1129	KO	Candidiasis of unspecified site	Candidiasis site NOS
1140	ICD114	Primary coccidioidomycosis (pulmonary)	Primary coccidioidomycos
1141	KO	Primary extrapulmonary coccidioidomycosis	Prim cutan coccidioid
1142	KO	Coccidioidal meningitis	Coccidioidal meningitis
1143	KO	Other forms of progressive coccidioidomycosis	Progress coccidioid NEC
1144	KO	Chronic pulmonary coccidioidomycosis	Ch pl coccidioidomycosis
1145	KO	Pulmonary coccidioidomycosis, unspecified	Pl cocidioidomycosis NOS
1149	KO	Coccidioidomycosis, unspecified	Coccidioidomycosis NOS
11500	ICD115	Infection by Histoplasma capsulatum, without mention of manifestation	Histoplasma capsulat NOS
11501	KO	Infection by Histoplasma capsulatum, meningitis	Histoplasm capsul mening
11502	KO	Infection by Histoplasma capsulatum, retinitis	Histoplasm capsul retina
11503	KO	Infection by Histoplasma capsulatum, pericarditis	Histoplasm caps pericard
11504	KO	Infection by Histoplasma capsulatum, endocarditis	Histoplasm caps endocard
11505	KO	Infection by Histoplasma capsulatum, pneumonia	Histoplasm caps pneumon
11509	KO	Infection by Histoplasma capsulatum, other	Histoplasma capsulat NEC
11510	KO	Infection by Histoplasma duboisii, without mention of manifestation	Histoplasma duboisii NOS
11511	KO	Infection by Histoplasma duboisii, meningitis	Histoplasm dubois mening
11512	KO	Infection by Histoplasma duboisii, retinitis	Histoplasm dubois retina
11513	KO	Infection by Histoplasma duboisii, pericarditis	Histoplasm dub pericard
11514	KO	Infection by Histoplasma duboisii, endocarditis	Histoplasm dub endocard
11515	KO	Infection by Histoplasma duboisii, pneumonia	Histoplasm dub pneumonia
11519	KO	Infection by Histoplasma duboisii, other	Histoplasma duboisii NEC
11590	KO	Histoplasmosis, unspecified, without mention of manifestation	Histoplasmosis NOS
11591	KO	Histoplasmosis, unspecified, meningitis	Histoplasmosis meningit
11592	KO	Histoplasmosis, unspecified, retinitis	Histoplasmosis retinitis
11593	KO	Histoplasmosis, unspecified, pericarditis	Histoplasmosis pericard
11594	KO	Histoplasmosis, unspecified, endocarditis	Histoplasmosis endocard
11595	KO	Histoplasmosis, unspecified, pneumonia	Histoplasmosis pneumonia
11599	KO	Histoplasmosis, unspecified, other	Histoplasmosis NEC
1160	ICD116	Blastomycosis	Blastomycosis
1161	KO	Paracoccidioidomycosis	Paracoccidioidomycosis
1162	KO	Lobomycosis	Lobomycosis
1170	ICD117	Rhinosporidiosis	Rhinosporidiosis
1171	KO	Sporotrichosis	Sporotrichosis
1172	KO	Chromoblastomycosis	Chromoblastomycosis
1173	KO	Aspergillosis	Aspergillosis
1174	KO	Mycotic mycetomas	Mycotic mycetomas
1175	KO	Cryptococcosis	Cryptococcosis
1176	KO	Allescheriosis [Petriellidosis]	Allescheriosis
1177	KO	Zygomycosis [Phycomycosis or Mucormycosis]	Zygomycosis
1178	KO	Infection by dematiacious fungi [Phaehyphomycosis]	Dematiacious fungi inf
1179	KO	Other and unspecified mycoses	Mycoses NEC & NOS
118	ICD118	Opportunistic mycoses	Opportunistic mycoses
1200	ICD120	Schistosomiasis due to schistosoma haematobium	Schistosoma haematobium
1201	KO	Schistosomiasis due to schistosoma mansoni	Schistosoma mansoni
1202	KO	Schistosomiasis due to schistosoma japonicum	Schistosoma japonicum
1203	KO	Cutaneous schistosomiasis	Cutaneous schistosoma
1208	KO	Other specified schistosomiasis	Schistosomiasis NEC
1209	KO	Schistosomiasis, unspecified	Schistosomiasis NOS
1210	ICD121	Opisthorchiasis	Opisthorchiasis
1211	KO	Clonorchiasis	Clonorchiasis
1212	KO	Paragonimiasis	Paragonimiasis
1213	KO	Fascioliasis	Fascioliasis
1214	KO	Fasciolopsiasis	Fasciolopsiasis
1215	KO	Metagonimiasis	Metagonimiasis
1216	KO	Heterophyiasis	Heterophyiasis
1218	KO	Other specified trematode infections	Trematode infection NEC
1219	KO	Trematode infection, unspecified	Trematode infection NOS
1220	ICD122	Echinococcus granulosus infection of liver	Echinococc granul liver
1221	KO	Echinococcus granulosus infection of lung	Echinococc granul lung
1222	KO	Echinococcus granulosus infection of thyroid	Echinococc gran thyroid
1223	KO	Echinococcus granulosus infection, other	Echinococc granul NEC
1224	KO	Echinococcus granulosus infection, unspecified	Echinococc granul NOS
1225	KO	Echinococcus multilocularis infection of liver	Echinococ multiloc liver
1226	KO	Echinococcus multilocularis infection, other	Echinococc multiloc NEC
1227	KO	Echinococcus multilocularis infection, unspecified	Echinococc multiloc NOS
1228	KO	Echinococcosis, unspecified, of liver	Echinococcosis NOS liver
1229	KO	Echinococcosis, other and unspecified	Echinococcosis NEC/NOS
1230	ICD123	Taenia solium infection, intestinal form	Taenia solium intestine
1231	KO	Cysticercosis	Cysticercosis
1232	KO	Taenia saginata infection	Taenia saginata infect
1233	KO	Taeniasis, unspecified	Taeniasis NOS
1234	KO	Diphyllobothriasis, intestinal	Diphyllobothrias intest
1235	KO	Sparganosis [larval diphyllobothriasis]	Sparganosis
1236	KO	Hymenolepiasis	Hymenolepiasis
1238	KO	Other specified cestode infection	Cestode infection NEC
1239	KO	Cestode infection, unspecified	Cestode infection NOS
124	ICD124	Trichinosis	Trichinosis
1250	ICD125	Bancroftian filariasis	Bancroftian filariasis
1251	KO	Malayan filariasis	Malayan filariasis
1252	KO	Loiasis	Loiasis
1253	KO	Onchocerciasis	Onchocerciasis
1254	KO	Dipetalonemiasis	Dipetalonemiasis
1255	KO	Mansonella ozzardi infection	Mansonella ozzardi infec
1256	KO	Other specified filariasis	Filariasis NEC
1257	KO	Dracontiasis	Dracontiasis
1259	KO	Unspecified filariasis	Filariasis NOS
1260	ICD126	Ancylostomiasis due to ancylostoma duodenale	Ancylostoma duodenale
1261	KO	Necatoriasis due to necator americanus	Necator Americanus
1262	KO	Ancylostomiasis due to ancylostoma braziliense	Ancylostoma braziliense
1263	KO	Ancylostomiasis due to ancylostoma ceylanicum	Ancylostoma ceylanicum
1268	KO	Other specified ancylostoma	Ancylostoma NEC
1269	KO	Ancylostomiasis and necatoriasis, unspecified	Ancylostomiasis NOS
1270	ICD127	Ascariasis	Ascariasis
1271	KO	Anisakiasis	Anisakiasis
1272	KO	Strongyloidiasis	Strongyloidiasis
1273	KO	Trichuriasis	Trichuriasis
1274	KO	Enterobiasis	Enterobiasis
1275	KO	Capillariasis	Capillariasis
1276	KO	Trichostrongyliasis	Trichostrongyliasis
1277	KO	Other specified intestinal helminthiasis	Intest helminthiasis NEC
1278	KO	Mixed intestinal helminthiasis	Mixed intestine helminth
1279	KO	Intestinal helminthiasis, unspecified	Intest helminthiasis NOS
1280	ICD128	Toxocariasis	Toxocariasis
1281	KO	Gnathostomiasis	Gnathostomiasis
1288	KO	Other specified helminthiasis	Helminthiasis NEC
1289	KO	Helminth infection, unspecified	Helminthiasis NOS
129	ICD129	Intestinal parasitism, unspecified	Intestin parasitism NOS
1300	ICD130	Meningoencephalitis due to toxoplasmosis	Toxoplasm meningoenceph
1301	KO	Conjunctivitis due to toxoplasmosis	Toxoplasm conjunctivitis
1302	KO	Chorioretinitis due to toxoplasmosis	Toxoplasm chorioretinit
1303	KO	Myocarditis due to toxoplasmosis	Toxoplasma myocarditis
1304	KO	Pneumonitis due to toxoplasmosis	Toxoplasma pneumonitis
1305	KO	Hepatitis due to toxoplasmosis	Toxoplasma hepatitis
1307	KO	Toxoplasmosis of other specified sites	Toxoplasmosis site NEC
1308	KO	Multisystemic disseminated toxoplasmosis	Multisystem toxoplasmos
1309	KO	Toxoplasmosis, unspecified	Toxoplasmosis NOS
13100	ICD131	Urogenital trichomoniasis, unspecified	Urogenital trichomon NOS
13101	KO	Trichomonal vulvovaginitis	Trichomonal vaginitis
13102	KO	Trichomonal urethritis	Trichomonal urethritis
13103	KO	Trichomonal prostatitis	Trichomonal prostatitis
13109	KO	Other urogenital trichomoniasis	Urogenital trichomon NEC
1318	KO	Trichomoniasis of other specified sites	Trichomoniasis NEC
1319	KO	Trichomoniasis, unspecified	Trichomoniasis NOS
1320	ICD132	Pediculus capitis [head louse]	Pediculus capitis
1321	KO	Pediculus corporis [body louse]	Pediculus corporis
1322	KO	Phthirus pubis [pubic louse]	Phthirus pubis
1323	KO	Mixed pediculosis infestation	Mixed pedicul & phthirus
1329	KO	Pediculosis, unspecified	Pediculosis NOS
1330	ICD133	Scabies	Scabies
1338	KO	Other acariasis	Acariasis NEC
1339	KO	Acariasis, unspecified	Acariasis NOS
1340	ICD134	Myiasis	Myiasis
1341	KO	Other arthropod infestation	Arthropod infest NEC
1342	KO	Hirudiniasis	Hirudiniasis
1348	KO	Other specified infestations	Infestation NEC
1349	KO	Infestation, unspecified	Infestation NOS
135	ICD135	Sarcoidosis	Sarcoidosis
1360	ICD136	Ainhum	Ainhum
1361	KO	Behcet's syndrome	Behcet's syndrome
13621	KO	Specific infection due to acanthamoeba	Infectn d/t acanthamoeba
13629	KO	Other specific infections by free-living amebae	Infc free-liv amebae NEC
1363	KO	Pneumocystosis	Pneumocystosis
1364	KO	Psorospermiasis	Psorospermiasis
1365	KO	Sarcosporidiosis	Sarcosporidiosis
1368	KO	Other specified infectious and parasitic diseases	Infect/parasite dis NEC
1369	KO	Unspecified infectious and parasitic diseases	Infect/parasite dis NOS
1370	ICD137	Late effects of respiratory or unspecified tuberculosis	Late effect tb, resp/NOS
1371	KO	Late effects of central nervous system tuberculosis	Late effect cns TB
1372	KO	Late effects of genitourinary tuberculosis	Late effect gu TB
1373	KO	Late effects of tuberculosis of bones and joints	Late eff bone & joint TB
1374	KO	Late effects of tuberculosis of other specified organs	Late effect TB NEC
138	ICD138	Late effects of acute poliomyelitis	Late effect acute polio
1390	ICD139	Late effects of viral encephalitis	Late eff viral encephal
1391	KO	Late effects of trachoma	Late effect of trachoma
1398	KO	Late effects of other and unspecified infectious and parasitic diseases	Late eff infect dis NEC
1400	ICD140	Malignant neoplasm of upper lip, vermilion border	Mal neo upper vermilion
1401	KO	Malignant neoplasm of lower lip, vermilion border	Mal neo lower vermilion
1403	KO	Malignant neoplasm of upper lip, inner aspect	Mal neo upper lip, inner
1404	KO	Malignant neoplasm of lower lip, inner aspect	Mal neo lower lip, inner
1405	KO	Malignant neoplasm of lip, unspecified, inner aspect	Mal neo lip, inner NOS
1406	KO	Malignant neoplasm of commissure of lip	Mal neo lip, commissure
1408	KO	Malignant neoplasm of other sites of lip	Mal neo lip NEC
1409	KO	Malignant neoplasm of lip, unspecified, vermilion border	Mal neo lip/vermil NOS
1410	ICD141	Malignant neoplasm of base of tongue	Mal neo tongue base
1411	KO	Malignant neoplasm of dorsal surface of tongue	Mal neo dorsal tongue
1412	KO	Malignant neoplasm of tip and lateral border of tongue	Mal neo tip/lat tongue
1413	KO	Malignant neoplasm of ventral surface of tongue	Mal neo ventral tongue
1414	KO	Malignant neoplasm of anterior two-thirds of tongue, part unspecified	Mal neo ant 2/3 tongue
1415	KO	Malignant neoplasm of junctional zone of tongue	Mal neo tongue junction
1416	KO	Malignant neoplasm of lingual tonsil	Mal neo lingual tonsil
1418	KO	Malignant neoplasm of other sites of tongue	Malig neo tongue NEC
1419	KO	Malignant neoplasm of tongue, unspecified	Malig neo tongue NOS
1420	ICD142	Malignant neoplasm of parotid gland	Malig neo parotid
1421	KO	Malignant neoplasm of submandibular gland	Malig neo submandibular
1422	KO	Malignant neoplasm of sublingual gland	Malig neo sublingual
1428	KO	Malignant neoplasm of other major salivary glands	Mal neo maj salivary NEC
1429	KO	Malignant neoplasm of salivary gland, unspecified	Mal neo salivary NOS
1430	ICD143	Malignant neoplasm of upper gum	Malig neo upper gum
1431	KO	Malignant neoplasm of lower gum	Malig neo lower gum
1438	KO	Malignant neoplasm of other sites of gum	Malig neo gum NEC
1439	KO	Malignant neoplasm of gum, unspecified	Malig neo gum NOS
1440	ICD144	Malignant neoplasm of anterior portion of floor of mouth	Mal neo ant floor mouth
1441	KO	Malignant neoplasm of lateral portion of floor of mouth	Mal neo lat floor mouth
1448	KO	Malignant neoplasm of other sites of floor of mouth	Mal neo mouth floor NEC
1449	KO	Malignant neoplasm of floor of mouth, part unspecified	Mal neo mouth floor NOS
1450	ICD145	Malignant neoplasm of cheek mucosa	Mal neo cheek mucosa
1451	KO	Malignant neoplasm of vestibule of mouth	Mal neo mouth vestibule
1452	KO	Malignant neoplasm of hard palate	Malig neo hard palate
1453	KO	Malignant neoplasm of soft palate	Malig neo soft palate
1454	KO	Malignant neoplasm of uvula	Malignant neoplasm uvula
1455	KO	Malignant neoplasm of palate, unspecified	Malignant neo palate NOS
1456	KO	Malignant neoplasm of retromolar area	Malig neo retromolar
1458	KO	Malignant neoplasm of other specified parts of mouth	Malig neoplasm mouth NEC
1459	KO	Malignant neoplasm of mouth, unspecified	Malig neoplasm mouth NOS
1460	ICD146	Malignant neoplasm of tonsil	Malignant neopl tonsil
1461	KO	Malignant neoplasm of tonsillar fossa	Mal neo tonsillar fossa
1462	KO	Malignant neoplasm of tonsillar pillars (anterior) (posterior)	Mal neo tonsil pillars
1463	KO	Malignant neoplasm of vallecula epiglottica	Malign neopl vallecula
1464	KO	Malignant neoplasm of anterior aspect of epiglottis	Mal neo ant epiglottis
1465	KO	Malignant neoplasm of junctional region of oropharynx	Mal neo epiglottis junct
1466	KO	Malignant neoplasm of lateral wall of oropharynx	Mal neo lat oropharynx
1467	KO	Malignant neoplasm of posterior wall of oropharynx	Mal neo post oropharynx
1468	KO	Malignant neoplasm of other specified sites of oropharynx	Mal neo oropharynx NEC
1469	KO	Malignant neoplasm of oropharynx, unspecified site	Malig neo oropharynx NOS
1470	ICD147	Malignant neoplasm of superior wall of nasopharynx	Mal neo super nasopharyn
1471	KO	Malignant neoplasm of posterior wall of nasopharynx	Mal neo post nasopharynx
1472	KO	Malignant neoplasm of lateral wall of nasopharynx	Mal neo lat nasopharynx
1473	KO	Malignant neoplasm of anterior wall of nasopharynx	Mal neo ant nasopharynx
1478	KO	Malignant neoplasm of other specified sites of nasopharynx	Mal neo nasopharynx NEC
1479	KO	Malignant neoplasm of nasopharynx, unspecified site	Mal neo nasopharynx NOS
1480	ICD148	Malignant neoplasm of postcricoid region of hypopharynx	Mal neo postcricoid
1481	KO	Malignant neoplasm of pyriform sinus	Mal neo pyriform sinus
1482	KO	Malignant neoplasm of aryepiglottic fold, hypopharyngeal aspect	Mal neo aryepiglott fold
1483	KO	Malignant neoplasm of posterior hypopharyngeal wall	Mal neo post hypopharynx
1488	KO	Malignant neoplasm of other specified sites of hypopharynx	Mal neo hypopharynx NEC
1489	KO	Malignant neoplasm of hypopharynx, unspecified site	Mal neo hypopharynx NOS
1490	ICD149	Malignant neoplasm of pharynx, unspecified	Mal neo pharynx NOS
1491	KO	Malignant neoplasm of waldeyer's ring	Mal neo waldeyer's ring
1498	KO	Malignant neoplasm of other sites within the lip and oral cavity	Mal neo oral/pharynx NEC
1499	KO	Malignant neoplasm of ill-defined sites within the lip and oral cavity	Mal neo orophryn ill-def
1500	ICD150	Malignant neoplasm of cervical esophagus	Mal neo cervical esophag
1501	KO	Malignant neoplasm of thoracic esophagus	Mal neo thoracic esophag
1502	KO	Malignant neoplasm of abdominal esophagus	Mal neo abdomin esophag
1503	KO	Malignant neoplasm of upper third of esophagus	Mal neo upper 3rd esoph
1504	KO	Malignant neoplasm of middle third of esophagus	Mal neo middle 3rd esoph
1505	KO	Malignant neoplasm of lower third of esophagus	Mal neo lower 3rd esoph
1508	KO	Malignant neoplasm of other specified part of esophagus	Mal neo esophagus NEC
1509	KO	Malignant neoplasm of esophagus, unspecified site	Mal neo esophagus NOS
1510	ICD151	Malignant neoplasm of cardia	Mal neo stomach cardia
1511	KO	Malignant neoplasm of pylorus	Malignant neo pylorus
1512	KO	Malignant neoplasm of pyloric antrum	Mal neo pyloric antrum
1513	KO	Malignant neoplasm of fundus of stomach	Mal neo stomach fundus
1514	KO	Malignant neoplasm of body of stomach	Mal neo stomach body
1515	KO	Malignant neoplasm of lesser curvature of stomach, unspecified	Mal neo stom lesser curv
1516	KO	Malignant neoplasm of greater curvature of stomach, unspecified	Mal neo stom great curv
1518	KO	Malignant neoplasm of other specified sites of stomach	Malig neopl stomach NEC
1519	KO	Malignant neoplasm of stomach, unspecified site	Malig neopl stomach NOS
1520	ICD152	Malignant neoplasm of duodenum	Malignant neopl duodenum
1521	KO	Malignant neoplasm of jejunum	Malignant neopl jejunum
1522	KO	Malignant neoplasm of ileum	Malignant neoplasm ileum
1523	KO	Malignant neoplasm of Meckel's diverticulum	Mal neo meckel's divert
1528	KO	Malignant neoplasm of other specified sites of small intestine	Mal neo small bowel NEC
1529	KO	Malignant neoplasm of small intestine, unspecified site	Mal neo small bowel NOS
1530	ICD153	Malignant neoplasm of hepatic flexure	Mal neo hepatic flexure
1531	KO	Malignant neoplasm of transverse colon	Mal neo transverse colon
1532	KO	Malignant neoplasm of descending colon	Mal neo descend colon
1533	KO	Malignant neoplasm of sigmoid colon	Mal neo sigmoid colon
1534	KO	Malignant neoplasm of cecum	Malignant neoplasm cecum
1535	KO	Malignant neoplasm of appendix vermiformis	Malignant neo appendix
1536	KO	Malignant neoplasm of ascending colon	Malig neo ascend colon
1537	KO	Malignant neoplasm of splenic flexure	Mal neo splenic flexure
1538	KO	Malignant neoplasm of other specified sites of large intestine	Malignant neo colon NEC
1539	KO	Malignant neoplasm of colon, unspecified site	Malignant neo colon NOS
1540	ICD154	Malignant neoplasm of rectosigmoid junction	Mal neo rectosigmoid jct
1541	KO	Malignant neoplasm of rectum	Malignant neopl rectum
1542	KO	Malignant neoplasm of anal canal	Malig neopl anal canal
1543	KO	Malignant neoplasm of anus, unspecified site	Malignant neo anus NOS
1548	KO	Malignant neoplasm of other sites of rectum, rectosigmoid junction, and anus	Mal neo rectum/anus NEC
1550	ICD155	Malignant neoplasm of liver, primary	Mal neo liver, primary
1551	KO	Malignant neoplasm of intrahepatic bile ducts	Mal neo intrahepat ducts
1552	KO	Malignant neoplasm of liver, not specified as primary or secondary	Malignant neo liver NOS
1560	ICD156	Malignant neoplasm of gallbladder	Malig neo gallbladder
1561	KO	Malignant neoplasm of extrahepatic bile ducts	Mal neo extrahepat ducts
1562	KO	Malignant neoplasm of ampulla of vater	Mal neo ampulla of vater
1568	KO	Malignant neoplasm of other specified sites of gallbladder and extrahepatic bile ducts	Malig neo biliary NEC
1569	KO	Malignant neoplasm of biliary tract, part unspecified site	Malig neo biliary NOS
1570	ICD157	Malignant neoplasm of head of pancreas	Mal neo pancreas head
1571	KO	Malignant neoplasm of body of pancreas	Mal neo pancreas body
1572	KO	Malignant neoplasm of tail of pancreas	Mal neo pancreas tail
1573	KO	Malignant neoplasm of pancreatic duct	Mal neo pancreatic duct
1574	KO	Malignant neoplasm of islets of langerhans	Mal neo islet langerhans
1578	KO	Malignant neoplasm of other specified sites of pancreas	Malig neo pancreas NEC
1579	KO	Malignant neoplasm of pancreas, part unspecified	Malig neo pancreas NOS
1580	ICD158	Malignant neoplasm of retroperitoneum	Mal neo retroperitoneum
1588	KO	Malignant neoplasm of specified parts of peritoneum	Mal neo peritoneum NEC
1589	KO	Malignant neoplasm of peritoneum, unspecified	Mal neo peritoneum NOS
1590	ICD159	Malignant neoplasm of intestinal tract, part unspecified	Malig neo intestine NOS
1591	KO	Malignant neoplasm of spleen, not elsewhere classified	Malignant neo spleen NEC
1598	KO	Malignant neoplasm of other sites of digestive system and intra-abdominal organs	Mal neo gi/intra-abd NEC
1599	KO	Malignant neoplasm of ill-defined sites within the digestive organs and peritoneum	Mal neo GI tract ill-def
1600	ICD160	Malignant neoplasm of nasal cavities	Mal neo nasal cavities
1601	KO	Malignant neoplasm of auditory tube, middle ear, and mastoid air cells	Malig neo middle ear
1602	KO	Malignant neoplasm of maxillary sinus	Mal neo maxillary sinus
1603	KO	Malignant neoplasm of ethmoidal sinus	Mal neo ethmoidal sinus
1604	KO	Malignant neoplasm of frontal sinus	Malig neo frontal sinus
1605	KO	Malignant neoplasm of sphenoidal sinus	Mal neo sphenoid sinus
1608	KO	Malignant neoplasm of other accessory sinuses	Mal neo access sinus NEC
1609	KO	Malignant neoplasm of accessory sinus, unspecified	Mal neo access sinus NOS
1610	ICD161	Malignant neoplasm of glottis	Malignant neo glottis
1611	KO	Malignant neoplasm of supraglottis	Malig neo supraglottis
1612	KO	Malignant neoplasm of subglottis	Malig neo subglottis
1613	KO	Malignant neoplasm of laryngeal cartilages	Mal neo cartilage larynx
1618	KO	Malignant neoplasm of other specified sites of larynx	Malignant neo larynx NEC
1619	KO	Malignant neoplasm of larynx, unspecified	Malignant neo larynx NOS
1620	ICD162	Malignant neoplasm of trachea	Malignant neo trachea
1622	KO	Malignant neoplasm of main bronchus	Malig neo main bronchus
1623	KO	Malignant neoplasm of upper lobe, bronchus or lung	Mal neo upper lobe lung
1624	KO	Malignant neoplasm of middle lobe, bronchus or lung	Mal neo middle lobe lung
1625	KO	Malignant neoplasm of lower lobe, bronchus or lung	Mal neo lower lobe lung
1628	KO	Malignant neoplasm of other parts of bronchus or lung	Mal neo bronch/lung NEC
1629	KO	Malignant neoplasm of bronchus and lung, unspecified	Mal neo bronch/lung NOS
1630	ICD163	Malignant neoplasm of parietal pleura	Mal neo parietal pleura
1631	KO	Malignant neoplasm of visceral pleura	Mal neo visceral pleura
1638	KO	Malignant neoplasm of other specified sites of pleura	Malig neopl pleura NEC
1639	KO	Malignant neoplasm of pleura, unspecified	Malig neopl pleura NOS
1640	ICD164	Malignant neoplasm of thymus	Malignant neopl thymus
1641	KO	Malignant neoplasm of heart	Malignant neopl heart
1642	KO	Malignant neoplasm of anterior mediastinum	Mal neo ant mediastinum
1643	KO	Malignant neoplasm of posterior mediastinum	Mal neo post mediastinum
1648	KO	Malignant neoplasm of other parts of mediastinum	Mal neo mediastinum NEC
1649	KO	Malignant neoplasm of mediastinum, part unspecified	Mal neo mediastinum NOS
1650	ICD165	Malignant neoplasm of upper respiratory tract, part unspecified	Mal neo upper resp NOS
1658	KO	Malignant neoplasm of other sites within the respiratory system and intrathoracic organs	Mal neo thorax/resp NEC
1659	KO	Malignant neoplasm of ill-defined sites within the respiratory system	Mal neo resp system NOS
1700	ICD170	Malignant neoplasm of bones of skull and face, except mandible	Mal neo skull/face bone
1701	KO	Malignant neoplasm of mandible	Malignant neo mandible
1702	KO	Malignant neoplasm of vertebral column, excluding sacrum and coccyx	Malig neo vertebrae
1703	KO	Malignant neoplasm of ribs, sternum, and clavicle	Mal neo ribs/stern/clav
1704	KO	Malignant neoplasm of scapula and long bones of upper limb	Mal neo long bones arm
1705	KO	Malignant neoplasm of short bones of upper limb	Mal neo bones wrist/hand
1706	KO	Malignant neoplasm of pelvic bones, sacrum, and coccyx	Mal neo pelvic girdle
1707	KO	Malignant neoplasm of long bones of lower limb	Mal neo long bones leg
1708	KO	Malignant neoplasm of short bones of lower limb	Mal neo bones ankle/foot
1709	KO	Malignant neoplasm of bone and articular cartilage, site unspecified	Malig neopl bone NOS
1710	ICD171	Malignant neoplasm of connective and other soft tissue of head, face, and neck	Mal neo soft tissue head
1712	KO	Malignant neoplasm of connective and other soft tissue of upper limb, including shoulder	Mal neo soft tissue arm
1713	KO	Malignant neoplasm of connective and other soft tissue of lower limb, including hip	Mal neo soft tissue leg
1714	KO	Malignant neoplasm of connective and other soft tissue of thorax	Mal neo soft tis thorax
1715	KO	Malignant neoplasm of connective and other soft tissue of abdomen	Mal neo soft tis abdomen
1716	KO	Malignant neoplasm of connective and other soft tissue of pelvis	Mal neo soft tis pelvis
1717	KO	Malignant neoplasm of connective and other soft tissue of trunk, unspecified	Mal neopl trunk NOS
1718	KO	Malignant neoplasm of other specified sites of connective and other soft tissue	Mal neo soft tissue NEC
1719	KO	Malignant neoplasm of connective and other soft tissue, site unspecified	Mal neo soft tissue NOS
1720	ICD172	Malignant melanoma of skin of lip	Malig melanoma lip
1721	KO	Malignant melanoma of skin of eyelid, including canthus	Malig melanoma eyelid
1722	KO	Malignant melanoma of skin of ear and external auditory canal	Malig melanoma ear
1723	KO	Malignant melanoma of skin of other and unspecified parts of face	Mal melanom face NEC/NOS
1724	KO	Malignant melanoma of skin of scalp and neck	Mal melanoma scalp/neck
1725	KO	Malignant melanoma of skin of trunk, except scrotum	Malig melanoma trunk
1726	KO	Malignant melanoma of skin of upper limb, including shoulder	Malig melanoma arm
1727	KO	Malignant melanoma of skin of lower limb, including hip	Malig melanoma leg
1728	KO	Malignant melanoma of other specified sites of skin	Malig melanoma skin NEC
1729	KO	Melanoma of skin, site unspecified	Malig melanoma skin NOS
17300	ICD173	Unspecified malignant neoplasm of skin of lip	Malig neopl skin lip NOS
17301	KO	Basal cell carcinoma of skin of lip	Basal cell ca skin lip
17302	KO	Squamous cell carcinoma of skin of lip	Squamous cell ca skn lip
17309	KO	Other specified malignant neoplasm of skin of lip	Malig neo skin lip NEC
17310	KO	Unspecified malignant neoplasm of eyelid, including canthus	Mal neo eyelid/canth NOS
17311	KO	Basal cell carcinoma of eyelid, including canthus	Basal cell ca lid/canth
17312	KO	Squamous cell carcinoma of eyelid, including canthus	Squam cell ca lid/canth
17319	KO	Other specified malignant neoplasm of eyelid, including canthus	Mal neo eyelid/canth NEC
17320	KO	Unspecified malignant neoplasm of skin of ear and external auditory canal	Malig neo skin ear NOS
17321	KO	Basal cell carcinoma of skin of ear and external auditory canal	Basal cell ca skin ear
17322	KO	Squamous cell carcinoma of skin of ear and external auditory canal	Squam cell ca skin ear
17329	KO	Other specified malignant neoplasm of skin of ear and external auditory canal	Neo skin ear/ex canl NEC
17330	KO	Unspecified malignant neoplasm of skin of other and unspecified parts of face	Mal neo skn face NEC/NOS
17331	KO	Basal cell carcinoma of skin of other and unspecified parts of face	Bsl cel skn face NEC/NOS
17332	KO	Squamous cell carcinoma of skin of other and unspecified parts of face	Sqm cel skn face NEC/NOS
17339	KO	Other specified malignant neoplasm of skin of other and unspecified parts of face	Mal neo skn face NEC/NOS
17340	KO	Unspecified malignant neoplasm of scalp and skin of neck	Mal neo sclp/skn nck NOS
17341	KO	Basal cell carcinoma of scalp and skin of neck	Bsl cell ca scalp/skn nk
17342	KO	Squamous cell carcinoma of scalp and skin of neck	Sqam cell ca sclp/skn nk
17349	KO	Other specified malignant neoplasm of scalp and skin of neck	Mal neo sclp/skn nck NEC
17350	KO	Unspecified malignant neoplasm of skin of trunk, except scrotum	Malig neo skin trunk NOS
17351	KO	Basal cell carcinoma of skin of trunk, except scrotum	Basal cell ca skin trunk
17352	KO	Squamous cell carcinoma of skin of trunk, except scrotum	Squam cell ca skin trunk
17359	KO	Other specified malignant neoplasm of skin of trunk, except scrotum	Malig neo skin trunk NEC
17360	KO	Unspecified malignant neoplasm of skin of upper limb, including shoulder	Mal neo skin up limb NOS
17361	KO	Basal cell carcinoma of skin of upper limb, including shoulder	Basal cell ca skn up lmb
17362	KO	Squamous cell carcinoma of skin of upper limb, including shoulder	Squam cell ca skn up lmb
17369	KO	Other specified malignant neoplasm of skin of upper limb, including shoulder	Malig neo skn up lmb NEC
17370	KO	Unspecified malignant neoplasm of skin of lower limb, including hip	Mal neo skn low limb NOS
17371	KO	Basal cell carcinoma of skin of lower limb, including hip	Basl cell ca skn low lmb
17372	KO	Squamous cell carcinoma of skin of lower limb, including hip	Sqam cell ca skn low lmb
17379	KO	Other specified malignant neoplasm of skin of lower limb, including hip	Mal neo skin low lmb NEC
17380	KO	Unspecified malignant neoplasm of other specified sites of skin	Mal neo skn site NEC/NOS
17381	KO	Basal cell carcinoma of other specified sites of skin	Bsl cell ca skn site NEC
17382	KO	Squamous cell carcinoma of other specified sites of skin	Sqm cell ca skn site NEC
17389	KO	Other specified malignant neoplasm of other specified sites of skin	Oth mal neo skn site NEC
17390	KO	Unspecified malignant neoplasm of skin, site unspecified	Malig neo skin site NOS
17391	KO	Basal cell carcinoma of skin, site unspecified	Basal cell ca skin NOS
17392	KO	Squamous cell carcinoma of skin, site unspecified	Squam cell ca skin NOS
17399	KO	Other specified malignant neoplasm of skin, site unspecified	Oth mal neo skn site NOS
1740	ICD174	Malignant neoplasm of nipple and areola of female breast	Malig neo nipple
1741	KO	Malignant neoplasm of central portion of female breast	Mal neo breast-central
1742	KO	Malignant neoplasm of upper-inner quadrant of female breast	Mal neo breast up-inner
1743	KO	Malignant neoplasm of lower-inner quadrant of female breast	Mal neo breast low-inner
1744	KO	Malignant neoplasm of upper-outer quadrant of female breast	Mal neo breast up-outer
1745	KO	Malignant neoplasm of lower-outer quadrant of female breast	Mal neo breast low-outer
1746	KO	Malignant neoplasm of axillary tail of female breast	Mal neo breast-axillary
1748	KO	Malignant neoplasm of other specified sites of female breast	Malign neopl breast NEC
1749	KO	Malignant neoplasm of breast (female), unspecified	Malign neopl breast NOS
1750	ICD175	Malignant neoplasm of nipple and areola of male breast	Mal neo male nipple
1759	KO	Malignant neoplasm of other and unspecified sites of male breast	Mal neo male breast NEC
1760	ICD176	Kaposi's sarcoma, skin	Skin - kaposi's sarcoma
1761	KO	Kaposi's sarcoma, soft tissue	Sft tisue - kpsi's srcma
1762	KO	Kaposi's sarcoma, palate	Palate - kpsi's sarcoma
1763	KO	Kaposi's sarcoma, gastrointestinal sites	GI sites - kpsi's srcoma
1764	KO	Kaposi's sarcoma, lung	Lung - kaposi's sarcoma
1765	KO	Kaposi's sarcoma, lymph nodes	Lym nds - kpsi's sarcoma
1768	KO	Kaposi's sarcoma, other specified sites	Spf sts - kpsi's sarcoma
1769	KO	Kaposi's sarcoma, unspecified site	Kaposi's sarcoma NOS
179	ICD179	Malignant neoplasm of uterus, part unspecified	Malig neopl uterus NOS
1800	ICD180	Malignant neoplasm of endocervix	Malig neo endocervix
1801	KO	Malignant neoplasm of exocervix	Malig neo exocervix
1808	KO	Malignant neoplasm of other specified sites of cervix	Malig neo cervix NEC
1809	KO	Malignant neoplasm of cervix uteri, unspecified site	Mal neo cervix uteri NOS
181	ICD181	Malignant neoplasm of placenta	Malignant neopl placenta
1820	ICD182	Malignant neoplasm of corpus uteri, except isthmus	Malig neo corpus uteri
1821	KO	Malignant neoplasm of isthmus	Mal neo uterine isthmus
1828	KO	Malignant neoplasm of other specified sites of body of uterus	Mal neo body uterus NEC
1830	ICD183	Malignant neoplasm of ovary	Malign neopl ovary
1832	KO	Malignant neoplasm of fallopian tube	Mal neo fallopian tube
1833	KO	Malignant neoplasm of broad ligament of uterus	Mal neo broad ligament
1834	KO	Malignant neoplasm of parametrium	Malig neo parametrium
1835	KO	Malignant neoplasm of round ligament of uterus	Mal neo round ligament
1838	KO	Malignant neoplasm of other specified sites of uterine adnexa	Mal neo adnexa NEC
1839	KO	Malignant neoplasm of uterine adnexa, unspecified site	Mal neo adnexa NOS
1840	ICD184	Malignant neoplasm of vagina	Malign neopl vagina
1841	KO	Malignant neoplasm of labia majora	Mal neo labia majora
1842	KO	Malignant neoplasm of labia minora	Mal neo labia minora
1843	KO	Malignant neoplasm of clitoris	Malign neopl clitoris
1844	KO	Malignant neoplasm of vulva, unspecified site	Malign neopl vulva NOS
1848	KO	Malignant neoplasm of other specified sites of female genital organs	Mal neo female genit NEC
1849	KO	Malignant neoplasm of female genital organ, site unspecified	Mal neo female genit NOS
185	ICD185	Malignant neoplasm of prostate	Malign neopl prostate
1860	ICD186	Malignant neoplasm of undescended testis	Mal neo undescend testis
1869	KO	Malignant neoplasm of other and unspecified testis	Malig neo testis NEC
1871	KO	Malignant neoplasm of prepuce	Malign neopl prepuce
1872	KO	Malignant neoplasm of glans penis	Malig neo glans penis
1873	KO	Malignant neoplasm of body of penis	Malig neo penis body
1874	KO	Malignant neoplasm of penis, part unspecified	Malig neo penis NOS
1875	KO	Malignant neoplasm of epididymis	Malig neo epididymis
1876	KO	Malignant neoplasm of spermatic cord	Mal neo spermatic cord
1877	KO	Malignant neoplasm of scrotum	Malign neopl scrotum
1878	KO	Malignant neoplasm of other specified sites of male genital organs	Mal neo male genital NEC
1879	KO	Malignant neoplasm of male genital organ, site unspecified	Mal neo male genital NOS
1880	ICD188	Malignant neoplasm of trigone of urinary bladder	Mal neo bladder-trigone
1881	KO	Malignant neoplasm of dome of urinary bladder	Mal neo bladder-dome
1882	KO	Malignant neoplasm of lateral wall of urinary bladder	Mal neo bladder-lateral
1883	KO	Malignant neoplasm of anterior wall of urinary bladder	Mal neo bladder-anterior
1884	KO	Malignant neoplasm of posterior wall of urinary bladder	Mal neo bladder-post
1885	KO	Malignant neoplasm of bladder neck	Mal neo bladder neck
1886	KO	Malignant neoplasm of ureteric orifice	Mal neo ureteric orifice
1887	KO	Malignant neoplasm of urachus	Malig neo urachus
1888	KO	Malignant neoplasm of other specified sites of bladder	Malig neo bladder NEC
1889	KO	Malignant neoplasm of bladder, part unspecified	Malig neo bladder NOS
1890	ICD189	Malignant neoplasm of kidney, except pelvis	Malig neopl kidney
1891	KO	Malignant neoplasm of renal pelvis	Malig neo renal pelvis
1892	KO	Malignant neoplasm of ureter	Malign neopl ureter
1893	KO	Malignant neoplasm of urethra	Malign neopl urethra
1894	KO	Malignant neoplasm of paraurethral glands	Mal neo paraurethral
1898	KO	Malignant neoplasm of other specified sites of urinary organs	Mal neo urinary NEC
1899	KO	Malignant neoplasm of urinary organ, site unspecified	Mal neo urinary NOS
1900	ICD190	Malignant neoplasm of eyeball, except conjunctiva, cornea, retina, and choroid	Malign neopl eyeball
1901	KO	Malignant neoplasm of orbit	Malign neopl orbit
1902	KO	Malignant neoplasm of lacrimal gland	Mal neo lacrimal gland
1903	KO	Malignant neoplasm of conjunctiva	Mal neo conjunctiva
1904	KO	Malignant neoplasm of cornea	Malign neopl cornea
1905	KO	Malignant neoplasm of retina	Malign neopl retina
1906	KO	Malignant neoplasm of choroid	Malign neopl choroid
1907	KO	Malignant neoplasm of lacrimal duct	Mal neo lacrimal duct
1908	KO	Malignant neoplasm of other specified sites of eye	Malign neopl eye NEC
1909	KO	Malignant neoplasm of eye, part unspecified	Malign neopl eye NOS
1910	ICD191	Malignant neoplasm of cerebrum, except lobes and ventricles	Malign neopl cerebrum
1911	KO	Malignant neoplasm of frontal lobe	Malig neo frontal lobe
1912	KO	Malignant neoplasm of temporal lobe	Mal neo temporal lobe
1913	KO	Malignant neoplasm of parietal lobe	Mal neo parietal lobe
1914	KO	Malignant neoplasm of occipital lobe	Mal neo occipital lobe
1915	KO	Malignant neoplasm of ventricles	Mal neo cereb ventricle
1916	KO	Malignant neoplasm of cerebellum nos	Mal neo cerebellum NOS
1917	KO	Malignant neoplasm of brain stem	Mal neo brain stem
1918	KO	Malignant neoplasm of other parts of brain	Malig neo brain NEC
1919	KO	Malignant neoplasm of brain, unspecified	Malig neo brain NOS
1920	ICD192	Malignant neoplasm of cranial nerves	Mal neo cranial nerves
1921	KO	Malignant neoplasm of cerebral meninges	Mal neo cerebral mening
1922	KO	Malignant neoplasm of spinal cord	Mal neo spinal cord
1923	KO	Malignant neoplasm of spinal meninges	Mal neo spinal meninges
1928	KO	Malignant neoplasm of other specified sites of nervous system	Mal neo nervous syst NEC
1929	KO	Malignant neoplasm of nervous system, part unspecified	Mal neo nervous syst NOS
193	ICD193	Malignant neoplasm of thyroid gland	Malign neopl thyroid
1940	ICD194	Malignant neoplasm of adrenal gland	Malign neopl adrenal
1941	KO	Malignant neoplasm of parathyroid gland	Malig neo parathyroid
1943	KO	Malignant neoplasm of pituitary gland and craniopharyngeal duct	Malig neo pituitary
1944	KO	Malignant neoplasm of pineal gland	Malign neo pineal gland
1945	KO	Malignant neoplasm of carotid body	Mal neo carotid body
1946	KO	Malignant neoplasm of aortic body and other paraganglia	Mal neo paraganglia NEC
1948	KO	Malignant neoplasm of other endocrine glands and related structures	Mal neo endocrine NEC
1949	KO	Malignant neoplasm of endocrine gland, site unspecified	Mal neo endocrine NOS
1950	ICD195	Malignant neoplasm of head, face, and neck	Mal neo head/face/neck
1951	KO	Malignant neoplasm of thorax	Malign neopl thorax
1952	KO	Malignant neoplasm of abdomen	Malig neo abdomen
1953	KO	Malignant neoplasm of pelvis	Malign neopl pelvis
1954	KO	Malignant neoplasm of upper limb	Malign neopl arm
1955	KO	Malignant neoplasm of lower limb	Malign neopl leg
1958	KO	Malignant neoplasm of other specified sites	Malig neo site NEC
1960	ICD196	Secondary and unspecified malignant neoplasm of lymph nodes of head, face, and neck	Mal neo lymph-head/neck
1961	KO	Secondary and unspecified malignant neoplasm of intrathoracic lymph nodes	Mal neo lymph-intrathor
1962	KO	Secondary and unspecified malignant neoplasm of intra-abdominal lymph nodes	Mal neo lymph intra-abd
1963	KO	Secondary and unspecified malignant neoplasm of lymph nodes of axilla and upper limb	Mal neo lymph-axilla/arm
1965	KO	Secondary and unspecified malignant neoplasm of lymph nodes of inguinal region and lower limb	Mal neo lymph-inguin/leg
1966	KO	Secondary and unspecified malignant neoplasm of intrapelvic lymph nodes	Mal neo lymph-intrapelv
1968	KO	Secondary and unspecified malignant neoplasm of lymph nodes of multiple sites	Mal neo lymph node-mult
1969	KO	Secondary and unspecified malignant neoplasm of lymph nodes, site unspecified	Mal neo lymph node NOS
1970	ICD197	Secondary malignant neoplasm of lung	Secondary malig neo lung
1971	KO	Secondary malignant neoplasm of mediastinum	Sec mal neo mediastinum
1972	KO	Secondary malignant neoplasm of pleura	Second malig neo pleura
1973	KO	Secondary malignant neoplasm of other respiratory organs	Sec malig neo resp NEC
1974	KO	Secondary malignant neoplasm of small intestine including duodenum	Sec malig neo sm bowel
1975	KO	Secondary malignant neoplasm of large intestine and rectum	Sec malig neo lg bowel
1976	KO	Secondary malignant neoplasm of retroperitoneum and peritoneum	Sec mal neo peritoneum
1977	KO	Malignant neoplasm of liver, secondary	Second malig neo liver
1978	KO	Secondary malignant neoplasm of other digestive organs and spleen	Sec mal neo GI NEC
1980	ICD198	Secondary malignant neoplasm of kidney	Second malig neo kidney
1981	KO	Secondary malignant neoplasm of other urinary organs	Sec malig neo urin NEC
1982	KO	Secondary malignant neoplasm of skin	Secondary malig neo skin
1983	KO	Secondary malignant neoplasm of brain and spinal cord	Sec mal neo brain/spine
1984	KO	Secondary malignant neoplasm of other parts of nervous system	Sec malig neo nerve NEC
1985	KO	Secondary malignant neoplasm of bone and bone marrow	Secondary malig neo bone
1986	KO	Secondary malignant neoplasm of ovary	Second malig neo ovary
1987	KO	Secondary malignant neoplasm of adrenal gland	Second malig neo adrenal
19881	KO	Secondary malignant neoplasm of breast	Second malig neo breast
19882	KO	Secondary malignant neoplasm of genital organs	Second malig neo genital
19889	KO	Secondary malignant neoplasm of other specified sites	Secondary malig neo NEC
1990	ICD199	Disseminated malignant neoplasm without specification of site	Malig neo disseminated
1991	KO	Other malignant neoplasm without specification of site	Malignant neoplasm NOS
1992	KO	Malignant neoplasm associated with transplant organ	Malig neopl-transp organ
20000	ICD200	Reticulosarcoma, unspecified site, extranodal and solid organ sites	Retclsrc unsp xtrndl org
20001	KO	Reticulosarcoma, lymph nodes of head, face, and neck	Reticulosarcoma head
20002	KO	Reticulosarcoma, intrathoracic lymph nodes	Reticulosarcoma thorax
20003	KO	Reticulosarcoma, intra-abdominal lymph nodes	Reticulosarcoma abdom
20004	KO	Reticulosarcoma, lymph nodes of axilla and upper limb	Reticulosarcoma axilla
20005	KO	Reticulosarcoma, lymph nodes of inguinal region and lower limb	Reticulosarcoma inguin
20006	KO	Reticulosarcoma, intrapelvic lymph nodes	Reticulosarcoma pelvic
20007	KO	Reticulosarcoma, spleen	Reticulosarcoma spleen
20008	KO	Reticulosarcoma, lymph nodes of multiple sites	Reticulosarcoma mult
20010	KO	Lymphosarcoma, unspecified site, extranodal and solid organ sites	Lymphsrc unsp xtrndl org
20011	KO	Lymphosarcoma, lymph nodes of head, face, and neck	Lymphosarcoma head
20012	KO	Lymphosarcoma, intrathoracic lymph nodes	Lymphosarcoma thorax
20013	KO	Lymphosarcoma, intra-abdominal lymph nodes	Lymphosarcoma abdom
20014	KO	Lymphosarcoma, lymph nodes of axilla and upper limb	Lymphosarcoma axilla
20015	KO	Lymphosarcoma, lymph nodes of inguinal region and lower limb	Lymphosarcoma inguin
20016	KO	Lymphosarcoma, intrapelvic lymph nodes	Lymphosarcoma pelvic
20017	KO	Lymphosarcoma, spleen	Lymphosarcoma spleen
20018	KO	Lymphosarcoma, lymph nodes of multiple sites	Lymphosarcoma mult
20020	KO	Burkitt's tumor or lymphoma, unspecified site, extranodal and solid organ sites	Brkt tmr unsp xtrndl org
20021	KO	Burkitt's tumor or lymphoma, lymph nodes of head, face, and neck	Burkitt's tumor head
20022	KO	Burkitt's tumor or lymphoma, intrathoracic lymph nodes	Burkitt's tumor thorax
20023	KO	Burkitt's tumor or lymphoma, intra-abdominal lymph nodes	Burkitt's tumor abdom
20024	KO	Burkitt's tumor or lymphoma, lymph nodes of axilla and upper limb	Burkitt's tumor axilla
20025	KO	Burkitt's tumor or lymphoma, lymph nodes of inguinal region and lower limb	Burkitt's tumor inguin
20026	KO	Burkitt's tumor or lymphoma, intrapelvic lymph nodes	Burkitt's tumor pelvic
20027	KO	Burkitt's tumor or lymphoma, spleen	Burkitt's tumor spleen
20028	KO	Burkitt's tumor or lymphoma, lymph nodes of multiple sites	Burkitt's tumor mult
20030	KO	Marginal zone lymphoma, unspecified site, extranodal and solid organ sites	Margnl zone lym xtrndl
20031	KO	Marginal zone lymphoma, lymph nodes of head, face, and neck	Margin zone lym head
20032	KO	Marginal zone lymphoma, intrathoracic lymph nodes	Margin zone lym thorax
20033	KO	Marginal zone lymphoma, intraabdominal lymph nodes	Margin zone lym abdom
20034	KO	Marginal zone lymphoma, lymph nodes of axilla and upper limb	Margin zone lym axilla
20035	KO	Marginal zone lymphoma, lymph nodes of inguinal region and lower limb	Margin zone lym inguin
20036	KO	Marginal zone lymphoma, intrapelvic lymph nodes	Margin zone lym pelvic
20037	KO	Marginal zone lymphoma, spleen	Margin zone lymph spleen
20038	KO	Marginal zone lymphoma, lymph nodes of multiple sites	Margin zone lymph multip
20040	KO	Mantle cell lymphoma, unspecified site, extranodal and solid organ sites	Mantle cell lym xtrrndl
20041	KO	Mantle cell lymphoma, lymph nodes of head, face, and neck	Mantle cell lymph head
20042	KO	Mantle cell lymphoma, intrathoracic lymph nodes	Mantle cell lymph thorax
20043	KO	Mantle cell lymphoma, intra-abdominal lymph nodes	Mantle cell lymph abdom
20044	KO	Mantle cell lymphoma, lymph nodes of axilla and upper limb	Mantle cell lymph axilla
20045	KO	Mantle cell lymphoma, lymph nodes of inguinal region and lower limb	Mantle cell lymph inguin
20046	KO	Mantle cell lymphoma, intrapelvic lymph nodes	Mantle cell lymph pelvic
20047	KO	Mantle cell lymphoma, spleen	Mantle cell lymph spleen
20048	KO	Mantle cell lymphoma, lymph nodes of multiple sites	Mantle cell lymph multip
20050	KO	Primary central nervous system lymphoma, unspecified site, extranodal and solid organ sites	Primary CNS lymph xtrndl
20051	KO	Primary central nervous system lymphoma, lymph nodes of head, face, and neck	Primary CNS lymph head
20052	KO	Primary central nervous system lymphoma, intrathoracic lymph nodes	Primary CNS lymph thorax
20053	KO	Primary central nervous system lymphoma, intra-abdominal lymph nodes	Primary CNS lymph abdom
20054	KO	Primary central nervous system lymphoma, lymph nodes of axilla and upper limb	Primary CNS lymph axilla
20055	KO	Primary central nervous system lymphoma, lymph nodes of inguinal region and lower limb	Primary CNS lym inguin
20056	KO	Primary central nervous system lymphoma, intrapelvic lymph nodes	Primary CNS lymph pelvic
20057	KO	Primary central nervous system lymphoma, spleen	Primary CNS lymph spleen
20058	KO	Primary central nervous system lymphoma, lymph nodes of multiple sites	Primary CNS lymph multip
20060	KO	Anaplastic large cell lymphoma, unspecified site, extranodal and solid organ sites	Anaplastic lymph xtrndl
20061	KO	Anaplastic large cell lymphoma, lymph nodes of head, face, and neck	Anaplastic lymph head
20062	KO	Anaplastic large cell lymphoma, intrathoracic lymph nodes	Anaplastic lymph thorax
20063	KO	Anaplastic large cell lymphoma, intra-abdominal lymph nodes	Anaplastic lymph abdom
20064	KO	Anaplastic large cell lymphoma, lymph nodes of axilla and upper limb	Anaplastic lymph axilla
20065	KO	Anaplastic large cell lymphoma, lymph nodes of inguinal region and lower limb	Anaplastic lymph inguin
20066	KO	Anaplastic large cell lymphoma, intrapelvic lymph nodes	Anaplastic lymph pelvic
20067	KO	Anaplastic large cell lymphoma, spleen	Anaplastic lymph spleen
20068	KO	Anaplastic large cell lymphoma, lymph nodes of multiple sites	Anaplastic lymph multip
20070	KO	Large cell lymphoma, unspecified site, extranodal and solid organ sites	Large cell lymph xtrndl
20071	KO	Large cell lymphoma, lymph nodes of head, face, and neck	Large cell lymphoma head
20072	KO	Large cell lymphoma, intrathoracic lymph nodes	Large cell lymph thorax
20073	KO	Large cell lymphoma, intra-abdominal lymph nodes	Large cell lymph abdom
20074	KO	Large cell lymphoma, lymph nodes of axilla and upper limb	Large cell lymph axilla
20075	KO	Large cell lymphoma, lymph nodes of inguinal region and lower limb	Large cell lymph inguin
20076	KO	Large cell lymphoma, intrapelvic lymph nodes	Large cell lymph pelvic
20077	KO	Large cell lymphoma, spleen	Large cell lymph spleen
20078	KO	Large cell lymphoma, lymph nodes of multiple sites	Large cell lymph multip
20080	KO	Other named variants of lymphosarcoma and reticulosarcoma, unspecified site, extranodal and solid organ sites	Oth varn unsp xtrndl org
20081	KO	Other named variants of lymphosarcoma and reticulosarcoma, lymph nodes of head, face, and neck	Mixed lymphosarc head
20082	KO	Other named variants of lymphosarcoma and reticulosarcoma,intrathoracic lymph nodes	Mixed lymphosarc thorax
20083	KO	Other named variants of lymphosarcoma and reticulosarcoma, intra-abdominal lymph nodes	Mixed lymphosarc abdom
20084	KO	Other named variants of lymphosarcoma and reticulosarcoma, lymph nodes of axilla and upper limb	Mixed lymphosarc axilla
20085	KO	Other named variants of lymphosarcoma and reticulosarcoma, lymph nodes of inguinal region and lower limb	Mixed lymphosarc inguin
20086	KO	Other named variants of lymphosarcoma and reticulosarcoma, intrapelvic lymph nodes	Mixed lymphosarc pelvic
20087	KO	Other named variants of lymphosarcoma and reticulosarcoma, spleen	Mixed lymphosarc spleen
20088	KO	Other named variants of lymphosarcoma and reticulosarcoma, lymph nodes of multiple sites	Mixed lymphosarc mult
20100	ICD201	Hodgkin's paragranuloma, unspecified site, extranodal and solid organ sites	Hdgk prg unsp xtrndl org
20101	KO	Hodgkin's paragranuloma, lymph nodes of head, face, and neck	Hodgkins paragran head
20102	KO	Hodgkin's paragranuloma, intrathoracic lymph nodes	Hodgkins paragran thorax
20103	KO	Hodgkin's paragranuloma, intra-abdominal lymph nodes	Hodgkins paragran abdom
20104	KO	Hodgkin's paragranuloma, lymph nodes of axilla and upper limb	Hodgkins paragran axilla
20105	KO	Hodgkin's paragranuloma, lymph nodes of inguinal region and lower limb	Hodgkins paragran inguin
20106	KO	Hodgkin's paragranuloma, intrapelvic lymph nodes	Hodgkins paragran pelvic
20107	KO	Hodgkin's paragranuloma, spleen	Hodgkins paragran spleen
20108	KO	Hodgkin's paragranuloma, lymph nodes of multiple sites	Hodgkins paragran mult
20110	KO	Hodgkin's granuloma, unspecified site, extranodal and solid organ sites	Hdgk grn unsp xtrndl org
20111	KO	Hodgkin's granuloma, lymph nodes of head, face, and neck	Hodgkins granulom head
20112	KO	Hodgkin's granuloma, intrathoracic lymph nodes	Hodgkins granulom thorax
20113	KO	Hodgkin's granuloma, intra-abdominal lymph nodes	Hodgkins granulom abdom
20114	KO	Hodgkin's granuloma, lymph nodes of axilla and upper limb	Hodgkins granulom axilla
20115	KO	Hodgkin's granuloma, lymph nodes of inguinal region and lower limb	Hodgkins granulom inguin
20116	KO	Hodgkin's granuloma, intrapelvic lymph nodes	Hodgkins granulom pelvic
20117	KO	Hodgkin's granuloma, spleen	Hodgkins granulom spleen
20118	KO	Hodgkin's granuloma, lymph nodes of multiple sites	Hodgkins granulom mult
20120	KO	Hodgkin's sarcoma, unspecified site, extranodal and solid organ sites	Hdgk src unsp xtrndl org
20121	KO	Hodgkin's sarcoma, lymph nodes of head, face, and neck	Hodgkins sarcoma head
20122	KO	Hodgkin's sarcoma, intrathoracic lymph nodes	Hodgkins sarcoma thorax
20123	KO	Hodgkin's sarcoma, intra-abdominal lymph nodes	Hodgkins sarcoma abdom
20124	KO	Hodgkin's sarcoma, lymph nodes of axilla and upper limb	Hodgkins sarcoma axilla
20125	KO	Hodgkin's sarcoma, lymph nodes of inguinal region and lower limb	Hodgkins sarcoma inguin
20126	KO	Hodgkin's sarcoma, intrapelvic lymph nodes	Hodgkins sarcoma pelvic
20127	KO	Hodgkin's sarcoma, spleen	Hodgkins sarcoma spleen
20128	KO	Hodgkin's sarcoma, lymph nodes of multiple sites	Hodgkins sarcoma mult
20140	KO	Hodgkin's disease, lymphocytic-histiocytic predominance, unspecified site, extranodal and solid organ sites	Lym-hst unsp xtrndl orgn
20141	KO	Hodgkin's disease, lymphocytic-histiocytic predominance, lymph nodes of head, face, and neck	Hodg lymph-histio head
20142	KO	Hodgkin's disease, lymphocytic-histiocytic predominance, intrathoracic lymph nodes	Hodg lymph-histio thorax
20143	KO	Hodgkin's disease, lymphocytic-histiocytic predominance, intra-abdominal lymph nodes	Hodg lymph-histio abdom
20144	KO	Hodgkin's disease, lymphocytic-histiocytic predominance, lymph nodes of axilla and upper limb	Hodg lymph-histio axilla
20145	KO	Hodgkin's disease, lymphocytic-histiocytic predominance, lymph nodes of inguinal region and lower limb	Hodg lymph-histio inguin
20146	KO	Hodgkin's disease, lymphocytic-histiocytic predominance, intrapelvic lymph nodes	Hodg lymph-histio pelvic
20147	KO	Hodgkin's disease, lymphocytic-histiocytic predominance, spleen	Hodg lymph-histio spleen
20148	KO	Hodgkin's disease, lymphocytic-histiocytic predominance, lymph nodes of multiple sites	Hodg lymph-histio mult
20150	KO	Hodgkin's disease, nodular sclerosis, unspecified site, extranodal and solid organ sites	Ndr sclr unsp xtrndl org
20151	KO	Hodgkin's disease, nodular sclerosis, lymph nodes of head, face, and neck	Hodg nodul sclero head
20152	KO	Hodgkin's disease, nodular sclerosis, intrathoracic lymph nodes	Hodg nodul sclero thorax
20153	KO	Hodgkin's disease, nodular sclerosis, intra-abdominal lymph nodes	Hodg nodul sclero abdom
20154	KO	Hodgkin's disease, nodular sclerosis, lymph nodes of axilla and upper limb	Hodg nodul sclero axilla
20155	KO	Hodgkin's disease, nodular sclerosis, lymph nodes of inguinal region and lower limb	Hodg nodul sclero inguin
20156	KO	Hodgkin's disease, nodular sclerosis, intrapelvic lymph nodes	Hodg nodul sclero pelvic
20157	KO	Hodgkin's disease, nodular sclerosis, spleen	Hodg nodul sclero spleen
20158	KO	Hodgkin's disease, nodular sclerosis, lymph nodes of multiple sites	Hodg nodul sclero mult
20160	KO	Hodgkin's disease, mixed cellularity, unspecified site, extranodal and solid organ sites	Mxd celr unsp xtrndl org
20161	KO	Hodgkin's disease, mixed cellularity, lymph nodes of head, face, and neck	Hodgkins mix cell head
20162	KO	Hodgkin's disease, mixed cellularity, intrathoracic lymph nodes	Hodgkins mix cell thorax
20163	KO	Hodgkin's disease, mixed cellularity, intra-abdominal lymph nodes	Hodgkins mix cell abdom
20164	KO	Hodgkin's disease, mixed cellularity, lymph nodes of axilla and upper limb	Hodgkins mix cell axilla
20165	KO	Hodgkin's disease, mixed cellularity, lymph nodes of inguinal region and lower limb	Hodgkins mix cell inguin
20166	KO	Hodgkin's disease, mixed cellularity, intrapelvic lymph nodes	Hodgkins mix cell pelvic
20167	KO	Hodgkin's disease, mixed cellularity, spleen	Hodgkins mix cell spleen
20168	KO	Hodgkin's disease, mixed cellularity, lymph nodes of multiple sites	Hodgkins mix cell mult
20170	KO	Hodgkin's disease, lymphocytic depletion, unspecified site, extranodal and solid organ sites	Lym dplt unsp xtrndl org
20171	KO	Hodgkin's disease, lymphocytic depletion, lymph nodes of head, face, and neck	Hodg lymph deplet head
20172	KO	Hodgkin's disease, lymphocytic depletion, intrathoracic lymph nodes	Hodg lymph deplet thorax
20173	KO	Hodgkin's disease, lymphocytic depletion, intra-abdominal lymph nodes	Hodg lymph deplet abdom
20174	KO	Hodgkin's disease, lymphocytic depletion, lymph nodes of axilla and upper limb	Hodg lymph deplet axilla
20175	KO	Hodgkin's disease, lymphocytic depletion, lymph nodes of inguinal region and lower limb	Hodg lymph deplet inguin
20176	KO	Hodgkin's disease, lymphocytic depletion, intrapelvic lymph nodes	Hodg lymph deplet pelvic
20177	KO	Hodgkin's disease, lymphocytic depletion, spleen	Hodg lymph deplet spleen
20178	KO	Hodgkin's disease, lymphocytic depletion, lymph nodes of multiple sites	Hodg lymph deplet mult
20190	KO	Hodgkin's disease, unspecified type, unspecified site, extranodal and solid organ sites	Hdgk dis unsp xtrndl org
20191	KO	Hodgkin's disease, unspecified type, lymph nodes of head, face, and neck	Hodgkins dis NOS head
20192	KO	Hodgkin's disease, unspecified type, intrathoracic lymph nodes	Hodgkins dis NOS thorax
20193	KO	Hodgkin's disease, unspecified type, intra-abdominal lymph nodes	Hodgkins dis NOS abdom
20194	KO	Hodgkin's disease, unspecified type, lymph nodes of axilla and upper limb	Hodgkins dis NOS axilla
20195	KO	Hodgkin's disease, unspecified type, lymph nodes of inguinal region and lower limb	Hodgkins dis NOS inguin
20196	KO	Hodgkin's disease, unspecified type, intrapelvic lymph nodes	Hodgkins dis NOS pelvic
20197	KO	Hodgkin's disease, unspecified type, spleen	Hodgkins dis NOS spleen
20198	KO	Hodgkin's disease, unspecified type, lymph nodes of multiple sites	Hodgkins dis NOS mult
20200	ICD202	Nodular lymphoma, unspecified site, extranodal and solid organ sites	Ndlr lym unsp xtrndl org
20201	KO	Nodular lymphoma, lymph nodes of head, face, and neck	Nodular lymphoma head
20202	KO	Nodular lymphoma, intrathoracic lymph nodes	Nodular lymphoma thorax
20203	KO	Nodular lymphoma, intra-abdominal lymph nodes	Nodular lymphoma abdom
20204	KO	Nodular lymphoma, lymph nodes of axilla and upper limb	Nodular lymphoma axilla
20205	KO	Nodular lymphoma, lymph nodes of inguinal region and lower limb	Nodular lymphoma inguin
20206	KO	Nodular lymphoma, intrapelvic lymph nodes	Nodular lymphoma pelvic
20207	KO	Nodular lymphoma, spleen	Nodular lymphoma spleen
20208	KO	Nodular lymphoma, lymph nodes of multiple sites	Nodular lymphoma mult
20210	KO	Mycosis fungoides, unspecified site, extranodal and solid organ sites	Mycs fng unsp xtrndl org
20211	KO	Mycosis fungoides, lymph nodes of head, face, and neck	Mycosis fungoides head
20212	KO	Mycosis fungoides, intrathoracic lymph nodes	Mycosis fungoides thorax
20213	KO	Mycosis fungoides, intra-abdominal lymph nodes	Mycosis fungoides abdom
20214	KO	Mycosis fungoides, lymph nodes of axilla and upper limb	Mycosis fungoides axilla
20215	KO	Mycosis fungoides, lymph nodes of inguinal region and lower limb	Mycosis fungoides inguin
20216	KO	Mycosis fungoides, intrapelvic lymph nodes	Mycosis fungoides pelvic
20217	KO	Mycosis fungoides, spleen	Mycosis fungoides spleen
20218	KO	Mycosis fungoides, lymph nodes of multiple sites	Mycosis fungoides mult
20220	KO	Sezary's disease, unspecified site, extranodal and solid organ sites	Szry dis unsp xtrndl org
20221	KO	Sezary's disease, lymph nodes of head, face, and neck	Sezary's disease head
20222	KO	Sezary's disease, intrathoracic lymph nodes	Sezary's disease thorax
20223	KO	Sezary's disease, intra-abdominal lymph nodes	Sezary's disease abdom
20224	KO	Sezary's disease, lymph nodes of axilla and upper limb	Sezary's disease axilla
20225	KO	Sezary's disease, lymph nodes of inguinal region and lower limb	Sezary's disease inguin
20226	KO	Sezary's disease, intrapelvic lymph nodes	Sezary's disease pelvic
20227	KO	Sezary's disease, spleen	Sezary's disease spleen
20228	KO	Sezary's disease, lymph nodes of multiple sites	Sezary's disease mult
20230	KO	Malignant histiocytosis, unspecified site, extranodal and solid organ sites	Mlg hist unsp xtrndl org
20231	KO	Malignant histiocytosis, lymph nodes of head, face, and neck	Mal histiocytosis head
20232	KO	Malignant histiocytosis, intrathoracic lymph nodes	Mal histiocytosis thorax
20233	KO	Malignant histiocytosis, intra-abdominal lymph nodes	Mal histiocytosis abdom
20234	KO	Malignant histiocytosis, lymph nodes of axilla and upper limb	Mal histiocytosis axilla
20235	KO	Malignant histiocytosis, lymph nodes of inguinal region and lower limb	Mal histiocytosis inguin
20236	KO	Malignant histiocytosis, intrapelvic lymph nodes	Mal histiocytosis pelvic
20237	KO	Malignant histiocytosis, spleen	Mal histiocytosis spleen
20238	KO	Malignant histiocytosis, lymph nodes of multiple sites	Mal histiocytosis mult
20240	KO	Leukemic reticuloendotheliosis, unspecified site, extranodal and solid organ sites	Lk rtctl unsp xtrndl org
20241	KO	Leukemic reticuloendotheliosis, lymph nodes of head, face, and neck	Hairy-cell leukem head
20242	KO	Leukemic reticuloendotheliosis, intrathoracic lymph nodes	Hairy-cell leukem thorax
20243	KO	Leukemic reticuloendotheliosis, intra-abdominal lymph nodes	Hairy-cell leukem abdom
20244	KO	Leukemic reticuloendotheliosis, lymph nodes of axilla and upper arm	Hairy-cell leukem axilla
20245	KO	Leukemic reticuloendotheliosis, lymph nodes of inguinal region and lower limb	Hairy-cell leukem inguin
20246	KO	Leukemic reticuloendotheliosis, intrapelvic lymph nodes	Hairy-cell leukem pelvic
20247	KO	Leukemic reticuloendotheliosis, spleen	Hairy-cell leukem spleen
20248	KO	Leukemic reticuloendotheliosis, lymph nodes of multiple sites	Hairy-cell leukem mult
20250	KO	Letterer-siwe disease, unspecified site, extranodal and solid organ sites	Ltr-siwe unsp xtrndl org
20251	KO	Letterer-siwe disease, lymph nodes of head, face, and neck	Letterer-siwe dis head
20252	KO	Letterer-siwe disease, intrathoracic lymph nodes	Letterer-siwe dis thorax
20253	KO	Letterer-siwe disease, intra-abdominal lymph nodes	Letterer-siwe dis abdom
20254	KO	Letterer-siwe disease, lymph nodes of axilla and upper limb	Letterer-siwe dis axilla
20255	KO	Letterer-siwe disease, lymph nodes of inguinal region and lower limb	Letterer-siwe dis inguin
20256	KO	Letterer-siwe disease, intrapelvic lymph nodes	Letterer-siwe dis pelvic
20257	KO	Letterer-siwe disease, spleen	Letterer-siwe dis spleen
20258	KO	Letterer-siwe disease, lymph nodes of multiple sites	Letterer-siwe dis mult
20260	KO	Malignant mast cell tumors, unspecified site, extranodal and solid organ sites	Mlg mast unsp xtrndl org
20261	KO	Malignant mast cell tumors, lymph nodes of head, face, and neck	Mal mastocytosis head
20262	KO	Malignant mast cell tumors, intrathoracic lymph nodes	Mal mastocytosis thorax
20263	KO	Malignant mast cell tumors, intra-abdominal lymph nodes	Mal mastocytosis abdom
20264	KO	Malignant mast cell tumors, lymph nodes of axilla and upper limb	Mal mastocytosis axilla
20265	KO	Malignant mast cell tumors, lymph nodes of inguinal region and lower limb	Mal mastocytosis inguin
20266	KO	Malignant mast cell tumors, intrapelvic lymph nodes	Mal mastocytosis pelvic
20267	KO	Malignant mast cell tumors, spleen	Mal mastocytosis spleen
20268	KO	Malignant mast cell tumors, lymph nodes of multiple sites	Mal mastocytosis mult
20270	KO	Peripheral T cell lymphoma, unspecified site, extranodal and solid organ sites	Periph T cell lym xtrndl
20271	KO	Peripheral T cell lymphoma, lymph nodes of head, face, and neck	Periph T cell lymph head
20272	KO	Peripheral T cell lymphoma, intrathoracic lymph nodes	Periph T cell lym thorax
20273	KO	Peripheral T cell lymphoma, intra-abdominal lymph nodes	Periph T cell lym abdom
20274	KO	Peripheral T cell lymphoma, lymph nodes of axilla and upper limb	Periph T cell lym axilla
20275	KO	Peripheral T cell lymphoma, lymph nodes of inguinal region and lower limb	Periph T cell lym inguin
20276	KO	Peripheral T cell lymphoma, intrapelvic lymph nodes	Periph T cell lym pelvic
20277	KO	Peripheral T cell lymphoma, spleen	Periph T cell lym spleen
20278	KO	Peripheral T cell lymphoma, lymph nodes of multiple sites	Periph T cell lym multip
20280	KO	Other malignant lymphomas, unspecified site, extranodal and solid organ sites	Oth lymp unsp xtrndl org
20281	KO	Other malignant lymphomas, lymph nodes of head, face, and neck	Lymphomas NEC head
20282	KO	Other malignant lymphomas, intrathoracic lymph nodes	Lymphomas NEC thorax
20283	KO	Other malignant lymphomas, intra-abdominal lymph nodes	Lymphomas NEC abdom
20284	KO	Other malignant lymphomas, lymph nodes of axilla and upper limb	Lymphomas NEC axilla
20285	KO	Other malignant lymphomas, lymph nodes of inguinal region and lower limb	Lymphomas NEC inguin
20286	KO	Other malignant lymphomas, intrapelvic lymph nodes	Lymphomas NEC pelvic
20287	KO	Other malignant lymphomas, spleen	Lymphomas NEC spleen
20288	KO	Other malignant lymphomas, lymph nodes of multiple sites	Lymphomas NEC mult
20290	KO	Other and unspecified malignant neoplasms of lymphoid and histiocytic tissue, unspecified site, extranodal and solid organ sites	Unsp lym unsp xtrndl org
20291	KO	Other and unspecified malignant neoplasms of lymphoid and histiocytic tissue, lymph nodes of head, face, and neck	Lymphoid mal NEC head
20292	KO	Other and unspecified malignant neoplasms of lymphoid and histiocytic tissue, intrathoracic lymph nodes	Lymphoid mal NEC thorax
20293	KO	Other and unspecified malignant neoplasms of lymphoid and histiocytic tissue, intra-abdominal lymph nodes	Lymphoid mal NEC abdom
20294	KO	Other and unspecified malignant neoplasms of lymphoid and histiocytic tissue, lymph nodes of axilla and upper limb	Lymphoid mal NEC axilla
20295	KO	Other and unspecified malignant neoplasms of lymphoid and histiocytic tissue, lymph nodes of inguinal region and lower limb	Lymphoid mal NEC inguin
20296	KO	Other and unspecified malignant neoplasms of lymphoid and histiocytic tissue, intrapelvic lymph nodes	Lymphoid mal NEC pelvic
20297	KO	Other and unspecified malignant neoplasms of lymphoid and histiocytic tissue, spleen	Lymphoid mal NEC spleen
20298	KO	Other and unspecified malignant neoplasms of lymphoid and histiocytic tissue, lymph nodes of multiple sites	Lymphoid mal NEC mult
20300	ICD203	Multiple myeloma, without mention of having achieved remission	Mult mye w/o achv rmson
20301	KO	Multiple myeloma, in remission	Mult myelm w remission
20302	KO	Multiple myeloma, in relapse	Mult myeloma in relapse
20310	KO	Plasma cell leukemia, without mention of having achieved remission	Pls cl leu w/o achv rmsn
20311	KO	Plasma cell leukemia, in remission	Plsm cell leuk w rmson
20312	KO	Plasma cell leukemia, in relapse	Plsm cel leuk in relapse
20380	KO	Other immunoproliferative neoplasms, without mention of having achieved remission	Oth imno npl wo ach rmsn
20381	KO	Other immunoproliferative neoplasms, in remission	Oth imnprfl npl w rmsn
20382	KO	Other immunoproliferative neoplasms, in relapse	Oth imnprlf neo-relapse
20400	ICD204	Acute lymphoid leukemia, without mention of having achieved remission	Ac lym leuk wo achv rmsn
20401	KO	Acute lymphoid leukemia, in remission	Act lym leuk w rmsion
20402	KO	Acute lymphoid leukemia, in relapse	Act lymp leuk in relapse
20410	KO	Chronic lymphoid leukemia, without mention of having achieved remission	Ch lym leuk wo achv rmsn
20411	KO	Chronic lymphoid leukemia, in remission	Chr lym leuk w rmsion
20412	KO	Chronic lymphoid leukemia, in relapse	Chr lymp leuk in relapse
20420	KO	Subacute lymphoid leukemia, without mention of having achieved remission	Sbac lym leu wo ach rmsn
20421	KO	Subacute lymphoid leukemia, in remission	Sbac lym leuk w rmsion
20422	KO	Subacute lymphoid leukemia, in relapse	Sbac lym leuk in relapse
20480	KO	Other lymphoid leukemia, without mention of having achieved remission	Oth lym leu wo achv rmsn
20481	KO	Other lymphoid leukemia, in remission	Oth lym leuk w rmsion
20482	KO	Other lymphoid leukemia, in relapse	Oth lym leuk in relapse
20490	KO	Unspecified lymphoid leukemia, without mention of having achieved remission	Uns lym leu wo ach rmsn
20491	KO	Unspecified lymphoid leukemia, in remission	Uns lym leuk w rmsion
20492	KO	Unspecified lymphoid leukemia, in relapse	Lymp leuk NOS relapse
20500	ICD205	Acute myeloid leukemia, without mention of having achieved remission	Ac myl leuk wo achv rmsn
20501	KO	Acute myeloid leukemia, in remission	Act myl leuk w rmsion
20502	KO	Acute myeloid leukemia, in relapse	Act myel leuk in relapse
20510	KO	Chronic myeloid leukemia, without mention of having achieved remission	Ch myl leuk wo achv rmsn
20511	KO	Chronic myeloid leukemia, in remission	Chr myl leuk w rmsion
20512	KO	Chronic myeloid leukemia, in relapse	Chr myel leuk in relapse
20520	KO	Subacute myeloid leukemia, without mention of having achieved remission	Sbac myl leu wo ach rmsn
20521	KO	Subacute myeloid leukemia,in remission	Sbac myl leuk w rmsion
20522	KO	Subacute myeloid leukemia, in relapse	Sbac myl leuk in relapse
20530	KO	Myeloid sarcoma, without mention of having achieved remission	Myl sarcoma wo achv rmsn
20531	KO	Myeloid sarcoma, in remission	Myl srcoma w rmsion
20532	KO	Myeloid sarcoma, in relapse	Myel sarcoma in relapse
20580	KO	Other myeloid leukemia, without mention of having achieved remission	Oth my leuk wo achv rmsn
20581	KO	Other myeloid leukemia, in remission	Oth myl leuk w rmsion
20582	KO	Other myeloid leukemia, in relapse	Oth myel leuk in relapse
20590	KO	Unspecified myeloid leukemia, without mention of having achieved remission	Uns my leu wo ach rmsn
20591	KO	Unspecified myeloid leukemia, in remission	Uns myl leuk w rmsion
20592	KO	Unspecified myeloid leukemia, in relapse	Myel leuk NOS in relapse
20600	ICD206	Acute monocytic leukemia, without mention of having achieved remission	Ac mono leu wo achv rmsn
20601	KO	Acute monocytic leukemia,in remission	Act mono leuk w rmsion
20602	KO	Acute monocytic leukemia, in relapse	Act mono leuk in relapse
20610	KO	Chronic monocytic leukemia, without mention of having achieved remission	Ch mono leu wo achv rmsn
20611	KO	Chronic monocytic leukemia, in remission	Chr mono leuk w rmsion
20612	KO	Chronic monocytic leukemia, in relapse	Chr mono leuk in relapse
20620	KO	Subacute monocytic leukemia, without mention of having achieved remission	Sbac mno leu wo ach rmsn
20621	KO	Subacute monocytic leukemia, in remission	Sbac mono leuk w rmsion
20622	KO	Subacute monocytic leukemia, in relapse	Sbac mono leu in relapse
20680	KO	Other monocytic leukemia, without mention of having achieved remission	Ot mono leu wo achv rmsn
20681	KO	Other monocytic leukemia, in remission	Oth mono leuk w rmsion
20682	KO	Other monocytic leukemia, in relapse	Oth mono leuk in relapse
20690	KO	Unspecified monocytic leukemia, without mention of having achieved remission	Uns mno leu wo ach rmsn
20691	KO	Unspecified monocytic leukemia, in remission	Uns mono leuk w rmsion
20692	KO	Unspecified monocytic leukemia, in relapse	Mono leuk NOS relapse
20700	ICD207	Acute erythremia and erythroleukemia, without mention of having achieved remission	Ac erth/erlk wo ach rmsn
20701	KO	Acute erythremia and erythroleukemia, in remission	Act erth/erylk w rmson
20702	KO	Acute erythremia and erythroleukemia, in relapse	Ac erth/erylk in relapse
20710	KO	Chronic erythremia, without mention of having achieved remission	Chr erythrm w/o ach rmsn
20711	KO	Chronic erythremia, in remission	Chr erythrm w remision
20712	KO	Chronic erythremia, in relapse	Chr erythrmia in relapse
20720	KO	Megakaryocytic leukemia, without mention of having achieved remission	Mgkrcyt leuk wo ach rmsn
20721	KO	Megakaryocytic leukemia, in remission	Mgkrycyt leuk w rmsion
20722	KO	Megakaryocytic leukemia, in relapse	Mgkrycyt leuk in relapse
20780	KO	Other specified leukemia, without mention of having achieved remission	Oth leuk w/o achv rmsn
20781	KO	Other specified leukemia, in remission	Oth spf leuk w remsion
20782	KO	Other specified leukemia, in relapse	Oth spf leuk in relapse
20800	ICD208	Acute leukemia of unspecified cell type, without mention of having achieved remission	Ac leu un cl wo ach rmsn
20801	KO	Acute leukemia of unspecified cell type, in remission	Act leuk uns cl w rmson
20802	KO	Acute leukemia of unspecified cell type, in relapse	Ac leuk uns cl relapse
20810	KO	Chronic leukemia of unspecified cell type, without mention of having achieved remission	Ch leu un cl wo ach rmsn
20811	KO	Chronic leukemia of unspecified cell type, in remission	Chr leuk uns cl w rmson
20812	KO	Chronic leukemia of unspecified cell type, in relapse	Ch leu uns cl in relapse
20820	KO	Subacute leukemia of unspecified cell type, without mention of having achieved remission	Sbc leu un cl wo ah rmsn
20821	KO	Subacute leukemia of unspecified cell type, in remission	Sbac leuk uns cl w rmson
20822	KO	Subacute leukemia of unspecified cell type, in relapse	Sbac leu uns cl-relapse
20880	KO	Other leukemia of unspecified cell type, without mention of having achieved remission	Ot leu un cl wo ach rmsn
20881	KO	Other leukemia of unspecified cell type, in remission	Oth leuk uns cl w rmson
20882	KO	Other leukemia of unspecified cell type, in relapse	Oth leuk uns cl-relapse
20890	KO	Unspecified leukemia, without mention of having achieved remission	Leuk NOS w/o achv rmsn
20891	KO	Unspecified leukemia, in remission	Leukemia NOS w remission
20892	KO	Unspecified leukemia, in relapse	Leukemia NOS in relapse
20900	ICD209	Malignant carcinoid tumor of the small intestine, unspecified portion	Mal crcnoid sm intst NOS
20901	KO	Malignant carcinoid tumor of the duodenum	Malig carcinoid duodenum
20902	KO	Malignant carcinoid tumor of the jejunum	Malig carcinoid jejunum
20903	KO	Malignant carcinoid tumor of the ileum	Malig carcinoid ileum
20910	KO	Malignant carcinoid tumor of the large intestine, unspecified portion	Mal crcnoid lg intst NOS
20911	KO	Malignant carcinoid tumor of the appendix	Malig carcinoid appendix
20912	KO	Malignant carcinoid tumor of the cecum	Malig carcinoid cecum
20913	KO	Malignant carcinoid tumor of the ascending colon	Mal crcnoid ascend colon
20914	KO	Malignant carcinoid tumor of the transverse colon	Mal crcnoid transv colon
20915	KO	Malignant carcinoid tumor of the descending colon	Mal carcinoid desc colon
20916	KO	Malignant carcinoid tumor of the sigmoid colon	Mal carcinoid sig colon
20917	KO	Malignant carcinoid tumor of the rectum	Malig carcinoid rectum
20920	KO	Malignant carcinoid tumor of unknown primary site	Mal crcnd prim site unkn
20921	KO	Malignant carcinoid tumor of the bronchus and lung	Mal carcinoid bronc/lung
20922	KO	Malignant carcinoid tumor of the thymus	Malig carcinoid thymus
20923	KO	Malignant carcinoid tumor of the stomach	Malig carcinoid stomach
20924	KO	Malignant carcinoid tumor of the kidney	Malig carcinoid kidney
20925	KO	Malignant carcinoid tumor of foregut, not otherwise specified	Mal carcnoid foregut NOS
20926	KO	Malignant carcinoid tumor of midgut, not otherwise specified	Mal carcinoid midgut NOS
20927	KO	Malignant carcinoid tumor of hindgut, not otherwise specified	Mal carcnoid hindgut NOS
20929	KO	Malignant carcinoid tumor of other sites	Malig carcinoid oth site
20930	KO	Malignant poorly differentiated neuroendocrine carcinoma, any site	Malig neuroendo ca NOS
20931	KO	Merkel cell carcinoma of the face	Merkel cell ca-face
20932	KO	Merkel cell carcinoma of the scalp and neck	Merkel cell ca-sclp/neck
20933	KO	Merkel cell carcinoma of the upper limb	Merkel cell ca-up limb
20934	KO	Merkel cell carcinoma of the lower limb	Merkel cell ca-low limb
20935	KO	Merkel cell carcinoma of the trunk	Merkel cell ca-trunk
20936	KO	Merkel cell carcinoma of other sites	Merkel cell ca-oth sites
20940	KO	Benign carcinoid tumor of the small intestine, unspecified portion	Ben crcnoid sm intst NOS
20941	KO	Benign carcinoid tumor of the duodenum	Ben carcinoid duodenum
[truncated: 12,568 more rows]

## Sheet: icd9_tmp
Variables	LONG DESCRIPTION	SHORT DESCRIPTION
ICD001	Cholera due to vibrio cholerae	Cholera d/t vib cholerae
ICD002	Typhoid fever	Typhoid fever
ICD003	Salmonella gastroenteritis	Salmonella enteritis
ICD004	Shigella dysenteriae	Shigella dysenteriae
ICD005	Staphylococcal food poisoning	Staph food poisoning
ICD006	Acute amebic dysentery without mention of abscess	Ac amebiasis w/o abscess
ICD007	Balantidiasis	Balantidiasis
ICD008	Intestinal infection due to E. coli, unspecified	Intest infec e coli NOS
ICD009	Infectious colitis, enteritis, and gastroenteritis	Infectious enteritis NOS
ICD010	Primary tuberculous infection, unspecified	Prim TB complex-unspec
ICD011	Tuberculosis of lung, infiltrative, unspecified	TB lung infiltr-unspec
ICD012	Tuberculous pleurisy, unspecified	TB pleurisy-unspec
ICD013	Tuberculous meningitis, unspecified	TB meningitis-unspec
ICD014	Tuberculous peritonitis, unspecified	TB peritonitis-unspec
ICD015	Tuberculosis of vertebral column, unspecified	TB of vertebra-unspec
ICD016	Tuberculosis of kidney, unspecified	TB of kidney-unspec
ICD017	Tuberculosis of skin and subcutaneous cellular tissue, unspecified	TB skin/subcutan-unspec
ICD018	Acute miliary tuberculosis, unspecified	Acute miliary tb-unspec
ICD020	Bubonic plague	Bubonic plague
ICD021	Ulceroglandular tularemia	Ulceroglandul tularemia
ICD022	Cutaneous anthrax	Cutaneous anthrax
ICD023	Brucella melitensis	Brucella melitensis
ICD024	Glanders	Glanders
ICD025	Melioidosis	Melioidosis
ICD026	Spirillary fever	Spirillary fever
ICD027	Listeriosis	Listeriosis
ICD030	Lepromatous leprosy [type L]	Lepromatous leprosy
ICD031	Pulmonary diseases due to other mycobacteria	Pulmonary mycobacteria
ICD032	Faucial diphtheria	Faucial diphtheria
ICD033	Whooping cough due to bordetella pertussis [B. pertussis]	Bordetella pertussis
ICD034	Streptococcal sore throat	Strep sore throat
ICD035	Erysipelas	Erysipelas
ICD036	Meningococcal meningitis	Meningococcal meningitis
ICD037	Tetanus	Tetanus
ICD038	Streptococcal septicemia	Streptococcal septicemia
ICD039	Cutaneous actinomycotic infection	Cutaneous actinomycosis
ICD040	Gas gangrene	Gas gangrene
ICD041	Streptococcus infection in conditions classified elsewhere and of unspecified site, streptococcus, unspecified	Streptococcus unspecf
ICD042	Human immunodeficiency virus [HIV] disease	Human immuno virus dis
ICD045	Acute paralytic poliomyelitis specified as bulbar, poliovirus, unspecified type	Ac bulbar polio-type NOS
ICD046	Kuru	Kuru
ICD047	Meningitis due to coxsackie virus	Coxsackie virus mening
ICD048	Other enterovirus diseases of central nervous system	Oth enteroviral cns dis
ICD049	Lymphocytic choriomeningitis	Lymphocytic choriomening
ICD050	Variola major	Variola major
ICD052	Postvaricella encephalitis	Postvaricella encephalit
ICD053	Herpes zoster with meningitis	Herpes zoster meningitis
ICD054	Eczema herpeticum	Eczema herpeticum
ICD055	Postmeasles encephalitis	Postmeasles encephalitis
ICD056	Rubella with unspecified neurological complication	Rubella nerve compl NOS
ICD057	Erythema infectiosum (fifth disease)	Erythema infectiosum
ICD059	Orthopoxvirus infection, unspecified	Orthopoxvirus infect NOS
ICD060	Sylvatic yellow fever	Sylvatic yellow fever
ICD061	Dengue	Dengue
ICD062	Japanese encephalitis	Japanese encephalitis
ICD063	Russian spring-summer [taiga] encephalitis	Russia spr-summer enceph
ICD064	Viral encephalitis transmitted by other and unspecified arthropods	Vir enceph arthropod NEC
ICD065	Crimean hemorrhagic fever [CHF Congo virus]	Crimean hemorrhagic fev
ICD066	Phlebotomus fever	Phlebotomus fever
ICD070	Viral hepatitis A with hepatic coma	Hepatitis A with coma
ICD071	Rabies	Rabies
ICD072	Mumps orchitis	Mumps orchitis
ICD073	Ornithosis with pneumonia	Ornithosis pneumonia
ICD074	Herpangina	Herpangina
ICD075	Infectious mononucleosis	Infectious mononucleosis
ICD076	Trachoma, initial stage	Trachoma, initial stage
ICD077	Inclusion conjunctivitis	Inclusion conjunctivitis
ICD078	Molluscum contagiosum	Molluscum contagiosum
ICD079	Adenovirus infection in conditions classified elsewhere and of unspecified site	Adenovirus infect NOS
ICD080	Louse-borne (epidemic) typhus	Louse-borne typhus
ICD081	Murine (endemic) typhus	Murine typhus
ICD082	Spotted fevers	Spotted fevers
ICD083	Q fever	Q fever
ICD084	Falciparum malaria [malignant tertian]	Falciparum malaria
ICD085	Visceral [kala-azar] leishmaniasis	Visceral leishmaniasis
ICD086	Chagas' disease with heart involvement	Chagas disease of heart
ICD087	Relapsing fever, louse-borne	Louse-borne relaps fever
ICD088	Bartonellosis	Bartonellosis
ICD090	Early congenital syphilis, symptomatic	Early cong syph symptom
ICD091	Genital syphilis (primary)	Primary genital syphilis
ICD092	Early syphilis, latent, serological relapse after treatment	Early syph latent relaps
ICD093	Aneurysm of aorta, specified as syphilitic	Aortic aneurysm, syphil
ICD094	Tabes dorsalis	Tabes dorsalis
ICD095	Syphilitic episcleritis	Syphilitic episcleritis
ICD096	Late syphilis, latent	Late syphilis latent
ICD097	Late syphilis, unspecified	Late syphilis NOS
ICD098	Gonococcal infection (acute) of lower genitourinary tract	Acute gc infect lower gu
ICD099	Chancroid	Chancroid
ICD100	Leptospirosis icterohemorrhagica	Leptospiros icterohem
ICD101	Vincent's angina	Vincent's angina
ICD102	Initial lesions of yaws	Initial lesions yaws
ICD103	Primary lesions of pinta	Pinta primary lesions
ICD104	Nonvenereal endemic syphilis	Nonvenereal endemic syph
ICD110	Dermatophytosis of scalp and beard	Dermatophyt scalp/beard
ICD111	Pityriasis versicolor	Pityriasis versicolor
ICD112	Candidiasis of mouth	Thrush
ICD114	Primary coccidioidomycosis (pulmonary)	Primary coccidioidomycos
ICD115	Infection by Histoplasma capsulatum, without mention of manifestation	Histoplasma capsulat NOS
ICD116	Blastomycosis	Blastomycosis
ICD117	Rhinosporidiosis	Rhinosporidiosis
ICD118	Opportunistic mycoses	Opportunistic mycoses
ICD120	Schistosomiasis due to schistosoma haematobium	Schistosoma haematobium
ICD121	Opisthorchiasis	Opisthorchiasis
ICD122	Echinococcus granulosus infection of liver	Echinococc granul liver
ICD123	Taenia solium infection, intestinal form	Taenia solium intestine
ICD124	Trichinosis	Trichinosis
ICD125	Bancroftian filariasis	Bancroftian filariasis
ICD126	Ancylostomiasis due to ancylostoma duodenale	Ancylostoma duodenale
ICD127	Ascariasis	Ascariasis
ICD128	Toxocariasis	Toxocariasis
ICD129	Intestinal parasitism, unspecified	Intestin parasitism NOS
ICD130	Meningoencephalitis due to toxoplasmosis	Toxoplasm meningoenceph
ICD131	Urogenital trichomoniasis, unspecified	Urogenital trichomon NOS
ICD132	Pediculus capitis [head louse]	Pediculus capitis
ICD133	Scabies	Scabies
ICD134	Myiasis	Myiasis
ICD135	Sarcoidosis	Sarcoidosis
ICD136	Ainhum	Ainhum
ICD137	Late effects of respiratory or unspecified tuberculosis	Late effect tb, resp/NOS
ICD138	Late effects of acute poliomyelitis	Late effect acute polio
ICD139	Late effects of viral encephalitis	Late eff viral encephal
ICD140	Malignant neoplasm of upper lip, vermilion border	Mal neo upper vermilion
ICD141	Malignant neoplasm of base of tongue	Mal neo tongue base
ICD142	Malignant neoplasm of parotid gland	Malig neo parotid
ICD143	Malignant neoplasm of upper gum	Malig neo upper gum
ICD144	Malignant neoplasm of anterior portion of floor of mouth	Mal neo ant floor mouth
ICD145	Malignant neoplasm of cheek mucosa	Mal neo cheek mucosa
ICD146	Malignant neoplasm of tonsil	Malignant neopl tonsil
ICD147	Malignant neoplasm of superior wall of nasopharynx	Mal neo super nasopharyn
ICD148	Malignant neoplasm of postcricoid region of hypopharynx	Mal neo postcricoid
ICD149	Malignant neoplasm of pharynx, unspecified	Mal neo pharynx NOS
ICD150	Malignant neoplasm of cervical esophagus	Mal neo cervical esophag
ICD151	Malignant neoplasm of cardia	Mal neo stomach cardia
ICD152	Malignant neoplasm of duodenum	Malignant neopl duodenum
ICD153	Malignant neoplasm of hepatic flexure	Mal neo hepatic flexure
ICD154	Malignant neoplasm of rectosigmoid junction	Mal neo rectosigmoid jct
ICD155	Malignant neoplasm of liver, primary	Mal neo liver, primary
ICD156	Malignant neoplasm of gallbladder	Malig neo gallbladder
ICD157	Malignant neoplasm of head of pancreas	Mal neo pancreas head
ICD158	Malignant neoplasm of retroperitoneum	Mal neo retroperitoneum
ICD159	Malignant neoplasm of intestinal tract, part unspecified	Malig neo intestine NOS
ICD160	Malignant neoplasm of nasal cavities	Mal neo nasal cavities
ICD161	Malignant neoplasm of glottis	Malignant neo glottis
ICD162	Malignant neoplasm of trachea	Malignant neo trachea
ICD163	Malignant neoplasm of parietal pleura	Mal neo parietal pleura
ICD164	Malignant neoplasm of thymus	Malignant neopl thymus
ICD165	Malignant neoplasm of upper respiratory tract, part unspecified	Mal neo upper resp NOS
ICD170	Malignant neoplasm of bones of skull and face, except mandible	Mal neo skull/face bone
ICD171	Malignant neoplasm of connective and other soft tissue of head, face, and neck	Mal neo soft tissue head
ICD172	Malignant melanoma of skin of lip	Malig melanoma lip
ICD173	Unspecified malignant neoplasm of skin of lip	Malig neopl skin lip NOS
ICD174	Malignant neoplasm of nipple and areola of female breast	Malig neo nipple
ICD175	Malignant neoplasm of nipple and areola of male breast	Mal neo male nipple
ICD176	Kaposi's sarcoma, skin	Skin - kaposi's sarcoma
ICD179	Malignant neoplasm of uterus, part unspecified	Malig neopl uterus NOS
ICD180	Malignant neoplasm of endocervix	Malig neo endocervix
ICD181	Malignant neoplasm of placenta	Malignant neopl placenta
ICD182	Malignant neoplasm of corpus uteri, except isthmus	Malig neo corpus uteri
ICD183	Malignant neoplasm of ovary	Malign neopl ovary
ICD184	Malignant neoplasm of vagina	Malign neopl vagina
ICD185	Malignant neoplasm of prostate	Malign neopl prostate
ICD186	Malignant neoplasm of undescended testis	Mal neo undescend testis
ICD188	Malignant neoplasm of trigone of urinary bladder	Mal neo bladder-trigone
ICD189	Malignant neoplasm of kidney, except pelvis	Malig neopl kidney
ICD190	Malignant neoplasm of eyeball, except conjunctiva, cornea, retina, and choroid	Malign neopl eyeball
ICD191	Malignant neoplasm of cerebrum, except lobes and ventricles	Malign neopl cerebrum
ICD192	Malignant neoplasm of cranial nerves	Mal neo cranial nerves
ICD193	Malignant neoplasm of thyroid gland	Malign neopl thyroid
ICD194	Malignant neoplasm of adrenal gland	Malign neopl adrenal
ICD195	Malignant neoplasm of head, face, and neck	Mal neo head/face/neck
ICD196	Secondary and unspecified malignant neoplasm of lymph nodes of head, face, and neck	Mal neo lymph-head/neck
ICD197	Secondary malignant neoplasm of lung	Secondary malig neo lung
ICD198	Secondary malignant neoplasm of kidney	Second malig neo kidney
ICD199	Disseminated malignant neoplasm without specification of site	Malig neo disseminated
ICD200	Reticulosarcoma, unspecified site, extranodal and solid organ sites	Retclsrc unsp xtrndl org
ICD201	Hodgkin's paragranuloma, unspecified site, extranodal and solid organ sites	Hdgk prg unsp xtrndl org
ICD202	Nodular lymphoma, unspecified site, extranodal and solid organ sites	Ndlr lym unsp xtrndl org
ICD203	Multiple myeloma, without mention of having achieved remission	Mult mye w/o achv rmson
ICD204	Acute lymphoid leukemia, without mention of having achieved remission	Ac lym leuk wo achv rmsn
ICD205	Acute myeloid leukemia, without mention of having achieved remission	Ac myl leuk wo achv rmsn
ICD206	Acute monocytic leukemia, without mention of having achieved remission	Ac mono leu wo achv rmsn
ICD207	Acute erythremia and erythroleukemia, without mention of having achieved remission	Ac erth/erlk wo ach rmsn
ICD208	Acute leukemia of unspecified cell type, without mention of having achieved remission	Ac leu un cl wo ach rmsn
ICD209	Malignant carcinoid tumor of the small intestine, unspecified portion	Mal crcnoid sm intst NOS
ICD210	Benign neoplasm of lip	Benign neoplasm lip
ICD211	Benign neoplasm of esophagus	Benign neo esophagus
ICD212	Benign neoplasm of nasal cavities, middle ear, and accessory sinuses	Ben neo nasal cav/sinus
ICD213	Benign neoplasm of bones of skull and face	Ben neo skull/face bone
ICD214	Lipoma of skin and subcutaneous tissue of face	Lipoma skin face
ICD215	Other benign neoplasm of connective and other soft tissue of head, face, and neck	Ben neo soft tissue head
ICD216	Benign neoplasm of skin of lip	Benign neo skin lip
ICD217	Benign neoplasm of breast	Benign neoplasm breast
ICD218	Submucous leiomyoma of uterus	Submucous leiomyoma
ICD219	Benign neoplasm of cervix uteri	Benign neo cervix uteri
ICD220	Benign neoplasm of ovary	Benign neoplasm ovary
ICD221	Benign neoplasm of fallopian tube and uterine ligaments	Ben neo fallopian tube
ICD222	Benign neoplasm of testis	Benign neoplasm testis
ICD223	Benign neoplasm of kidney, except pelvis	Benign neoplasm kidney
ICD224	Benign neoplasm of eyeball, except conjunctiva, cornea, retina, and choroid	Benign neoplasm eyeball
ICD225	Benign neoplasm of brain	Benign neoplasm brain
ICD226	Benign neoplasm of thyroid glands	Benign neoplasm thyroid
ICD227	Benign neoplasm of adrenal gland	Benign neoplasm adrenal
ICD228	Hemangioma of unspecified site	Hemangioma NOS
ICD229	Benign neoplasm of lymph nodes	Benign neo lymph nodes
ICD230	Carcinoma in situ of lip, oral cavity, and pharynx	Ca in situ oral cav/phar
ICD231	Carcinoma in situ of larynx	Ca in situ larynx
ICD232	Carcinoma in situ of skin of lip	Ca in situ skin lip
ICD233	Carcinoma in situ of breast	Ca in situ breast
ICD234	Carcinoma in situ of eye	Ca in situ eye
ICD235	Neoplasm of uncertain behavior of major salivary glands	Unc behav neo salivary
ICD236	Neoplasm of uncertain behavior of uterus	Uncert behav neo uterus
ICD237	Neoplasm of uncertain behavior of pituitary gland and craniopharyngeal duct	Unc behav neo pituitary
ICD238	Neoplasm of uncertain behavior of bone and articular cartilage	Unc behav neo bone
ICD239	Neoplasm of unspecified nature of digestive system	Digestive neoplasm NOS
ICD240	Goiter, specified as simple	Simple goiter
ICD241	Nontoxic uninodular goiter	Nontox uninodular goiter
ICD242	Toxic diffuse goiter without mention of thyrotoxic crisis or storm	Tox dif goiter no crisis
ICD243	Congenital hypothyroidism	Congenital hypothyroidsm
ICD244	Postsurgical hypothyroidism	Postsurgical hypothyroid
ICD245	Acute thyroiditis	Acute thyroiditis
ICD246	Disorders of thyrocalcitonin secretion	Dis thyrocalciton secret
ICD249	Secondary diabetes mellitus without mention of complication, not stated as uncontrolled, or unspecified	Sec DM wo cmp nt st uncn
ICD250	Diabetes mellitus without mention of complication, type II or unspecified type, not stated as uncontrolled	DMII wo cmp nt st uncntr
ICD251	Hypoglycemic coma	Hypoglycemic coma
ICD252	Hyperparathyroidism, unspecified	Hyperparathyroidism NOS
ICD253	Acromegaly and gigantism	Acromegaly and gigantism
ICD254	Persistent hyperplasia of thymus	Persist hyperplas thymus
ICD255	Cushing's syndrome	Cushing's syndrome
ICD256	Hyperestrogenism	Hyperestrogenism
ICD257	Testicular hyperfunction	Testicular hyperfunction
ICD259	Delay in sexual development and puberty, not elsewhere classified	Delay sexual develop NEC
ICD260	Kwashiorkor	Kwashiorkor
ICD261	Nutritional marasmus	Nutritional marasmus
ICD262	Other severe protein-calorie malnutrition	Oth severe malnutrition
ICD263	Malnutrition of moderate degree	Malnutrition mod degree
ICD264	Vitamin A deficiency with conjunctival xerosis	Vit A conjunctiv xerosis
ICD265	Beriberi	Beriberi
ICD266	Ariboflavinosis	Ariboflavinosis
ICD267	Ascorbic acid deficiency	Ascorbic acid deficiency
ICD268	Rickets, active	Rickets, active
ICD269	Deficiency of vitamin K	Deficiency of vitamin k
ICD270	Disturbances of amino-acid transport	Amino-acid transport dis
ICD271	Glycogenosis	Glycogenosis
ICD272	Pure hypercholesterolemia	Pure hypercholesterolem
ICD273	Polyclonal hypergammaglobulinemia	Polyclon hypergammaglobu
ICD274	Gouty arthropathy, unspecified	Gouty arthropathy NOS
ICD276	Hyperosmolality and/or hypernatremia	Hyperosmolality
ICD277	Cystic fibrosis without mention of meconium ileus	Cystic fibros w/o ileus
ICD278	Obesity, unspecified	Obesity NOS
ICD279	Hypogammaglobulinemia, unspecified	Hypogammaglobulinem NOS
ICD280	Iron deficiency anemia secondary to blood loss (chronic)	Chr blood loss anemia
ICD281	Pernicious anemia	Pernicious anemia
ICD282	Hereditary spherocytosis	Hereditary spherocytosis
ICD283	Autoimmune hemolytic anemias	Autoimmun hemolytic anem
ICD285	Sideroblastic anemia	Sideroblastic anemia
ICD286	Congenital factor VIII disorder	Cong factor viii diord
ICD287	Allergic purpura	Allergic purpura
ICD288	Neutropenia, unspecified	Neutropenia NOS
ICD289	Polycythemia, secondary	Secondary polycythemia
ICD290	Senile dementia, uncomplicated	Senile dementia uncomp
ICD291	Alcohol withdrawal delirium	Delirium tremens
ICD292	Drug withdrawal	Drug withdrawal
ICD293	Delirium due to conditions classified elsewhere	Delirium d/t other cond
ICD294	Amnestic disorder in conditions classified elsewhere	Amnestic disord oth dis
ICD295	Simple type schizophrenia, unspecified	Simpl schizophren-unspec
ICD296	Bipolar I disorder, single manic episode, unspecified	Bipol I single manic NOS
ICD297	Paranoid state, simple	Paranoid state, simple
ICD298	Depressive type psychosis	React depress psychosis
ICD299	Autistic disorder, current or active state	Autistic disord-current
ICD300	Anxiety state, unspecified	Anxiety state NOS
ICD301	Paranoid personality disorder	Paranoid personality
ICD302	Ego-dystonic sexual orientation	Ego-dystonic sex orient
ICD303	Acute alcoholic intoxication in alcoholism, unspecified	Ac alcohol intox-unspec
ICD304	Opioid type dependence, unspecified	Opioid dependence-unspec
ICD305	Alcohol abuse, unspecified	Alcohol abuse-unspec
ICD306	Musculoskeletal malfunction arising from mental factors	Psychogen musculskel dis
ICD307	Adult onset fluency disorder	Adult onset flncy disord
ICD308	Predominant disturbance of emotions	Stress react, emotional
ICD309	Adjustment disorder with depressed mood	Adjustmnt dis w depressn
ICD310	Frontal lobe syndrome	Frontal lobe syndrome
ICD311	Depressive disorder, not elsewhere classified	Depressive disorder NEC
ICD312	Undersocialized conduct disorder, aggressive type, unspecified	Unsocial aggress-unspec
ICD313	Overanxious disorder specific to childhood and adolescence	Overanxious disorder
ICD314	Attention deficit disorder without mention of hyperactivity	Attn defic nonhyperact
ICD315	Developmental reading disorder, unspecified	Reading disorder NOS
ICD316	Psychic factors associated with diseases classified elsewhere	Psychic factor w oth dis
ICD317	Mild intellectual disabilities	Mild intellect disabilty
ICD318	Moderate intellectual disabilities	Mod intellect disability
ICD319	Unspecified intellectual disabilities	Intellect disability NOS
ICD320	Hemophilus meningitis	Hemophilus meningitis
ICD321	Cryptococcal meningitis	Cryptococcal meningitis
ICD322	Nonpyogenic meningitis	Nonpyogenic meningitis
ICD324	Intracranial abscess	Intracranial abscess
ICD325	Phlebitis and thrombophlebitis of intracranial venous sinuses	Phlebitis intrcran sinus
ICD326	Late effects of intracranial abscess or pyogenic infection	Late eff cns abscess
ICD327	Organic insomnia, unspecified	Organic insomnia NOS
ICD330	Leukodystrophy	Leukodystrophy
ICD331	Alzheimer's disease	Alzheimer's disease
ICD332	Paralysis agitans	Paralysis agitans
ICD333	Other degenerative diseases of the basal ganglia	Degen basal ganglia NEC
ICD334	Friedreich's ataxia	Friedreich's ataxia
ICD335	Werdnig-Hoffmann disease	Werdnig-hoffmann disease
ICD336	Syringomyelia and syringobulbia	Syringomyelia
ICD337	Idiopathic peripheral autonomic neuropathy, unspecified	Idio perph auto neur NOS
ICD338	Central pain syndrome	Central pain syndrome
ICD339	Cluster headache syndrome, unspecified	Cluster headache syn NOS
ICD340	Multiple sclerosis	Multiple sclerosis
ICD341	Neuromyelitis optica	Neuromyelitis optica
ICD342	Flaccid hemiplegia and hemiparesis affecting unspecified side	Flccd hmiplga unspf side
ICD343	Congenital diplegia	Congenital diplegia
ICD344	Quadriplegia, unspecified	Quadriplegia, unspecifd
ICD345	Generalized nonconvulsive epilepsy, without mention of intractable epilepsy	Gen noncv ep w/o intr ep
ICD346	Migraine with aura, without mention of intractable migraine without mention of status migrainosus	Mgrn w aura wo ntrc mgrn
ICD347	Narcolepsy, without cataplexy	Narcolepsy w/o cataplexy
ICD348	Cerebral cysts	Cerebral cysts
ICD349	Reaction to spinal or lumbar puncture	Lumbar puncture reaction
ICD351	Bell's palsy	Bell's palsy
ICD352	Disorders of olfactory (1st) nerve	Olfactory nerve disorder
ICD353	Brachial plexus lesions	Brachial plexus lesions
ICD354	Carpal tunnel syndrome	Carpal tunnel syndrome
ICD355	Lesion of sciatic nerve	Sciatic nerve lesion
ICD356	Hereditary peripheral neuropathy	Hered periph neuropathy
ICD357	Acute infective polyneuritis	Ac infect polyneuritis
ICD358	Myasthenia gravis without (acute) exacerbation	Mysthna grvs w/o ac exac
ICD359	Congenital hereditary muscular dystrophy	Cong hered musc dystrphy
ICD360	Purulent endophthalmitis, unspecified	Purulent endophthalm NOS
ICD361	Retinal detachment with retinal defect, unspecified	Detachmnt w defect NOS
ICD363	Focal chorioretinitis, unspecified	Focal chorioretinit NOS
ICD364	Acute and subacute iridocyclitis, unspecified	Acute iridocyclitis NOS
ICD365	Preglaucoma, unspecified	Preglaucoma NOS
ICD366	Nonsenile cataract, unspecified	Nonsenile cataract NOS
ICD367	Hypermetropia	Hypermetropia
ICD368	Amblyopia, unspecified	Amblyopia NOS
ICD369	Profound impairment, both eyes, impairment level not further specified	Both eyes blind-who def
ICD370	Corneal ulcer, unspecified	Corneal ulcer NOS
ICD371	Corneal opacity, unspecified	Corneal opacity NOS
ICD372	Acute conjunctivitis, unspecified	Acute conjunctivitis NOS
ICD373	Blepharitis, unspecified	Blepharitis NOS
ICD374	Entropion, unspecified	Entropion NOS
ICD375	Dacryoadenitis, unspecified	Dacryoadenitis NOS
ICD376	Acute inflammation of orbit, unspecified	Acute inflam NOS, orbit
ICD377	Papilledema, unspecified	Papilledema NOS
ICD378	Esotropia, unspecified	Esotropia NOS
ICD379	Scleritis, unspecified	Scleritis NOS
ICD380	Perichondritis of pinna, unspecified	Perichondritis pinna NOS
ICD381	Acute nonsuppurative otitis media, unspecified	Ac nonsup otitis med NOS
ICD382	Acute suppurative otitis media without spontaneous rupture of eardrum	Ac supp otitis media NOS
ICD383	Acute mastoiditis without complications	Ac mastoiditis w/o compl
ICD384	Acute myringitis, unspecified	Acute myringitis NOS
ICD385	Tympanosclerosis, unspecified as to involvement	Tympanosclerosis NOS
ICD386	Ménière's disease, unspecified	Meniere's disease NOS
ICD387	Otosclerosis involving oval window, nonobliterative	Otoscler-oval wnd nonobl
ICD388	Degenerative and vascular disorders, unspecified	Degen/vascul dis ear NOS
ICD389	Conductive hearing loss, unspecified	Conduct hearing loss NOS
ICD390	Rheumatic fever without mention of heart involvement	Rheum fev w/o hrt involv
ICD391	Acute rheumatic pericarditis	Acute rheumatic pericard
ICD392	Rheumatic chorea with heart involvement	Rheum chorea w hrt invol
ICD393	Chronic rheumatic pericarditis	Chr rheumatic pericard
ICD394	Mitral stenosis	Mitral stenosis
ICD395	Rheumatic aortic stenosis	Rheumat aortic stenosis
ICD396	Mitral valve stenosis and aortic valve stenosis	Mitral/aortic stenosis
ICD397	Diseases of tricuspid valve	Tricuspid valve disease
ICD398	Rheumatic myocarditis	Rheumatic myocarditis
ICD401	Malignant essential hypertension	Malignant hypertension
ICD402	Malignant hypertensive heart disease without heart failure	Mal hyp ht dis w/o hf
ICD403	Hypertensive chronic kidney disease, malignant, with chronic kidney disease stage I through stage IV, or unspecified	Mal hy kid w cr kid I-IV
ICD404	Hypertensive heart and chronic kidney disease, malignant, without heart failure and with chronic kidney disease stage I through stage IV, or unspecified	Mal hy ht/kd I-IV w/o hf
ICD410	Acute myocardial infarction of anterolateral wall, episode of care unspecified	AMI anterolateral,unspec
ICD411	Postmyocardial infarction syndrome	Post MI syndrome
ICD412	Old myocardial infarction	Old myocardial infarct
ICD413	Angina decubitus	Angina decubitus
ICD414	Coronary atherosclerosis of unspecified type of vessel, native or graft	Cor ath unsp vsl ntv/gft
ICD415	Acute cor pulmonale	Acute cor pulmonale
ICD416	Primary pulmonary hypertension	Prim pulm hypertension
ICD417	Arteriovenous fistula of pulmonary vessels	Arterioven fistu pul ves
ICD420	Acute pericarditis in diseases classified elsewhere	Ac pericardit in oth dis
ICD421	Acute and subacute bacterial endocarditis	Ac/subac bact endocard
ICD422	Acute myocarditis in diseases classified elsewhere	Ac myocardit in oth dis
ICD423	Hemopericardium	Hemopericardium
ICD424	Mitral valve disorders	Mitral valve disorder
ICD425	Endomyocardial fibrosis	Endomyocardial fibrosis
ICD426	Atrioventricular block, complete	Atriovent block complete
ICD427	Paroxysmal supraventricular tachycardia	Parox atrial tachycardia
ICD428	Congestive heart failure, unspecified	CHF NOS
ICD429	Myocarditis, unspecified	Myocarditis NOS
ICD430	Subarachnoid hemorrhage	Subarachnoid hemorrhage
ICD431	Intracerebral hemorrhage	Intracerebral hemorrhage
ICD432	Nontraumatic extradural hemorrhage	Nontraum extradural hem
ICD433	Occlusion and stenosis of basilar artery without mention of cerebral infarction	Ocl bslr art wo infrct
ICD434	Cerebral thrombosis without mention of cerebral infarction	Crbl thrmbs wo infrct
ICD435	Basilar artery syndrome	Basilar artery syndrome
ICD436	Acute, but ill-defined, cerebrovascular disease	Cva
ICD437	Cerebral atherosclerosis	Cerebral atherosclerosis
ICD438	Late effects of cerebrovascular disease, cognitive deficits	Late ef CV dis-cognf def
ICD440	Atherosclerosis of aorta	Aortic atherosclerosis
ICD441	Dissection of aorta, unspecified site	Dsct of aorta unsp site
ICD442	Aneurysm of artery of upper extremity	Upper extremity aneurysm
ICD443	Other peripheral vascular disease	Other peripheral vascular disease
ICD446	Polyarteritis nodosa	Polyarteritis nodosa
ICD447	Arteriovenous fistula, acquired	Acq arterioven fistula
ICD448	Hereditary hemorrhagic telangiectasia	Heredit hemorr telangiec
ICD449	Septic arterial embolism	Septic arterial embolism
ICD451	Phlebitis and thrombophlebitis of superficial vessels of lower extremities	Superfic phlebitis-leg
ICD452	Portal vein thrombosis	Portal vein thrombosis
ICD453	Budd-chiari syndrome	Budd-chiari syndrome
ICD454	Varicose veins of lower extremities with ulcer	Leg varicosity w ulcer
ICD455	Internal hemorrhoids without mention of complication	Int hemorrhoid w/o compl
ICD456	Esophageal varices with bleeding	Esophag varices w bleed
ICD457	Postmastectomy lymphedema syndrome	Postmastect lymphedema
ICD458	Orthostatic hypotension	Orthostatic hypotension
ICD459	Hemorrhage, unspecified	Hemorrhage NOS
ICD460	Acute nasopharyngitis [common cold]	Acute nasopharyngitis
ICD461	Acute maxillary sinusitis	Ac maxillary sinusitis
ICD462	Acute pharyngitis	Acute pharyngitis
ICD463	Acute tonsillitis	Acute tonsillitis
ICD464	Acute laryngitis without mention of obstruction	Ac laryngitis w/o obst
ICD465	Acute laryngopharyngitis	Acute laryngopharyngitis
ICD466	Acute bronchitis	Acute bronchitis
ICD470	Deviated nasal septum	Deviated nasal septum
ICD471	Polyp of nasal cavity	Polyp of nasal cavity
ICD472	Chronic rhinitis	Chronic rhinitis
ICD473	Chronic maxillary sinusitis	Chr maxillary sinusitis
ICD474	Chronic tonsillitis	Chronic tonsillitis
ICD475	Peritonsillar abscess	Peritonsillar abscess
ICD476	Chronic laryngitis	Chronic laryngitis
ICD477	Allergic rhinitis due to pollen	Rhinitis due to pollen
ICD478	Hypertrophy of nasal turbinates	Hypertrph nasal turbinat
ICD480	Pneumonia due to adenovirus	Adenoviral pneumonia
ICD481	Pneumococcal pneumonia [Streptococcus pneumoniae pneumonia]	Pneumococcal pneumonia
ICD482	Pneumonia due to Klebsiella pneumoniae	K. pneumoniae pneumonia
ICD483	Pneumonia due to mycoplasma pneumoniae	Pneu mycplsm pneumoniae
ICD485	Bronchopneumonia, organism unspecified	Bronchopneumonia org NOS
ICD486	Pneumonia, organism unspecified	Pneumonia, organism NOS
ICD487	Influenza with pneumonia	Influenza with pneumonia
ICD490	Bronchitis, not specified as acute or chronic	Bronchitis NOS
ICD491	Simple chronic bronchitis	Simple chr bronchitis
ICD492	Emphysematous bleb	Emphysematous bleb
ICD493	Extrinsic asthma, unspecified	Extrinsic asthma NOS
ICD494	Bronchiectasis without acute exacerbation	Bronchiectas w/o ac exac
ICD495	Farmers' lung	Farmers' lung
ICD496	Chronic airway obstruction, not elsewhere classified	Chr airway obstruct NEC
ICD500	Coal workers' pneumoconiosis	Coal workers' pneumocon
ICD501	Asbestosis	Asbestosis
ICD502	Pneumoconiosis due to other silica or silicates	Silica pneumocon NEC
ICD503	Pneumoconiosis due to other inorganic dust	Inorg dust pneumocon NEC
ICD504	Pneumonopathy due to inhalation of other dust	Dust pneumonopathy NEC
ICD505	Pneumoconiosis, unspecified	Pneumoconiosis NOS
ICD506	Bronchitis and pneumonitis due to fumes and vapors	Fum/vapor bronc/pneumon
ICD507	Pneumonitis due to inhalation of food or vomitus	Food/vomit pneumonitis
ICD508	Acute pulmonary manifestations due to radiation	Ac pul manif d/t radiat
ICD510	Empyema with fistula	Empyema with fistula
ICD511	Pleurisy without mention of effusion or current tuberculosis	Pleurisy w/o effus or TB
ICD512	Spontaneous tension pneumothorax	Spont tens pneumothorax
ICD513	Abscess of lung	Abscess of lung
ICD514	Pulmonary congestion and hypostasis	Pulm congest/hypostasis
ICD515	Postinflammatory pulmonary fibrosis	Postinflam pulm fibrosis
ICD516	Pulmonary alveolar proteinosis	Pul alveolar proteinosis
ICD518	Pulmonary collapse	Pulmonary collapse
ICD519	Tracheostomy complication, unspecified	Tracheostomy comp NOS
ICD520	Anodontia	Anodontia
ICD521	Dental caries, unspecified	Dental caries NOS
ICD522	Pulpitis	Pulpitis
ICD523	Acute gingivitis, plaque induced	Acute gingititis, plaque
ICD524	Major anomalies of jaw size, unspecified anomaly	Unspcf anomaly jaw size
ICD525	Exfoliation of teeth due to systemic causes	Exfoliation of teeth
ICD526	Developmental odontogenic cysts	Devel odontogenic cysts
ICD527	Atrophy of salivary gland	Salivary gland atrophy
ICD528	Stomatitis and mucositis, unspecified	Stomatitis/mucositis NOS
ICD529	Glossitis	Glossitis
ICD530	Achalasia and cardiospasm	Achalasia & cardiospasm
ICD531	Acute gastric ulcer with hemorrhage, without mention of obstruction	Ac stomach ulcer w hem
ICD532	Acute duodenal ulcer with hemorrhage, without mention of obstruction	Ac duodenal ulcer w hem
ICD533	Acute peptic ulcer of unspecified site with hemorrhage, without mention of obstruction	Ac peptic ulcer w hemorr
ICD534	Acute gastrojejunal ulcer with hemorrhage, without mention of obstruction	Ac marginal ulcer w hem
ICD535	Acute gastritis, without mention of hemorrhage	Acute gastrtis w/o hmrhg
ICD536	Achlorhydria	Achlorhydria
ICD537	Acquired hypertrophic pyloric stenosis	Acq pyloric stenosis
ICD538	Gastrointestinal mucositis (ulcerative)	GI mucositis (ulceratve)
ICD540	Acute appendicitis with generalized peritonitis	Ac append w peritonitis
ICD541	Appendicitis, unqualified	Appendicitis NOS
ICD542	Other appendicitis	Other appendicitis
ICD543	Hyperplasia of appendix (lymphoid)	Hyperplasia of appendix
ICD550	Inguinal hernia, with gangrene, unilateral or unspecified (not specified as recurrent)	Unilat ing hernia w gang
ICD551	Femoral hernia with gangrene, unilateral or unspecified (not specified as recurrent)	Unil femoral hern w gang
ICD552	Femoral hernia with obstruction, unilateral or unspecified (not specified as recurrent)	Unil femoral hern w obst
ICD553	Femoral hernia without mention of obstruction of gangrene, unilateral or unspecified(not specified as recurrent)	Unilat femoral hernia
ICD555	Regional enteritis of small intestine	Reg enteritis, sm intest
ICD556	Ulcerative (chronic) enterocolitis	Ulcerative enterocolitis
ICD557	Acute vascular insufficiency of intestine	Ac vasc insuff intestine
ICD560	Intussusception	Intussusception
ICD562	Diverticulosis of small intestine (without mention of hemorrhage)	Dvrtclo sml int w/o hmrg
ICD564	Constipation, unspecified	Constipation NOS
ICD565	Anal fissure	Anal fissure
ICD566	Abscess of anal and rectal regions	Anal & rectal abscess
ICD567	Peritonitis in infectious diseases classified elsewhere	Peritonitis in infec dis
ICD568	Peritoneal adhesions (postoperative) (postinfection)	Peritoneal adhesions
ICD569	Anal and rectal polyp	Anal & rectal polyp
ICD570	Acute and subacute necrosis of liver	Acute necrosis of liver
ICD571	Alcoholic fatty liver	Alcoholic fatty liver
ICD572	Abscess of liver	Abscess of liver
ICD573	Chronic passive congestion of liver	Chr passiv congest liver
ICD574	Calculus of gallbladder with acute cholecystitis, without mention of obstruction	Cholelith w ac cholecyst
ICD575	Acute cholecystitis	Acute cholecystitis
ICD576	Postcholecystectomy syndrome	Postcholecystectomy synd
ICD577	Acute pancreatitis	Acute pancreatitis
ICD578	Hematemesis	Hematemesis
ICD579	Celiac disease	Celiac disease
ICD580	Acute glomerulonephritis with lesion of proliferative glomerulonephritis	Ac proliferat nephritis
ICD581	Nephrotic syndrome with lesion of proliferative glomerulonephritis	Nephrotic syn, prolifer
ICD582	Chronic glomerulonephritis with lesion of proliferative glomerulonephritis	Chr proliferat nephritis
ICD583	Nephritis and nephropathy, not specified as acute or chronic, with lesion of proliferative glomerulonephritis	Proliferat nephritis NOS
ICD586	Renal failure, unspecified	Renal failure NOS
ICD587	Renal sclerosis, unspecified	Renal sclerosis NOS
ICD588	Renal osteodystrophy	Renal osteodystrophy
ICD589	Unilateral small kidney	Unilateral small kidney
ICD590	Chronic pyelonephritis without lesion of renal medullary necrosis	Chr pyelonephritis NOS
ICD591	Hydronephrosis	Hydronephrosis
ICD592	Calculus of kidney	Calculus of kidney
ICD593	Nephroptosis	Nephroptosis
ICD594	Calculus in diverticulum of bladder	Blad diverticulum calcul
ICD595	Acute cystitis	Acute cystitis
ICD596	Bladder neck obstruction	Bladder neck obstruction
ICD597	Urethral abscess	Urethral abscess
ICD598	Urethral stricture due to unspecified infection	Urethr strict:infect NOS
ICD599	Urinary tract infection, site not specified	Urin tract infection NOS
ICD600	Hypertrophy (benign) of prostate without urinary obstruction and other lower urinary tract symptom (LUTS)	BPH w/o urinary obs/LUTS
ICD601	Acute prostatitis	Acute prostatitis
ICD602	Calculus of prostate	Calculus of prostate
ICD603	Encysted hydrocele	Encysted hydrocele
ICD604	Orchitis, epididymitis, and epididymo-orchitis, with abscess	Orchitis with abscess
ICD605	Redundant prepuce and phimosis	Redun prepuce & phimosis
ICD606	Azoospermia	Azoospermia
ICD607	Leukoplakia of penis	Leukoplakia of penis
ICD608	Seminal vesiculitis	Seminal vesiculitis
ICD610	Solitary cyst of breast	Solitary cyst of breast
ICD611	Inflammatory disease of breast	Inflam disease of breast
ICD612	Deformity of reconstructed breast	Deformity reconst breast
ICD614	Acute salpingitis and oophoritis	Ac salpingo-oophoritis
ICD615	Acute inflammatory diseases of uterus, except cervix	Ac uterine inflammation
ICD616	Cervicitis and endocervicitis	Cervicitis
ICD617	Endometriosis of uterus	Uterine endometriosis
ICD618	Unspecified prolapse of vaginal walls	Vaginal wall prolpse NOS
ICD619	Urinary-genital tract fistula, female	Urin-genital fistul, fem
ICD620	Follicular cyst of ovary	Follicular cyst of ovary
ICD621	Polyp of corpus uteri	Polyp of corpus uteri
ICD622	Erosion and ectropion of cervix	Erosion/ectropion cervix
ICD623	Dysplasia of vagina	Dysplasia of vagina
ICD625	Dyspareunia	Dyspareunia
ICD626	Absence of menstruation	Absence of menstruation
ICD627	Premenopausal menorrhagia	Premenopause menorrhagia
ICD628	Infertility, female, associated with anovulation	Infertility-anovulation
ICD629	Hematocele, female, not elsewhere classified	Hematocele, female NEC
ICD630	Hydatidiform mole	Hydatidiform mole
ICD631	Inappropriate change in quantitative human chorionic gonadotropin (hCG) in early pregnancy	Inapp chg hCG early preg
ICD632	Missed abortion	Missed abortion
ICD633	Abdominal pregnancy without intrauterine pregnancy	Abd preg w/o intrau preg
ICD634	Spontaneous abortion, complicated by genital tract and pelvic infection, unspecified	Spon abor w pel inf-unsp
ICD635	Legally induced abortion, complicated by genital tract and pelvic infection, unspecified	Leg abor w pelv inf-unsp
ICD636	Illegally induced abortion, complicated by genital tract and pelvic infection, unspecified	Illeg ab w pelv inf-unsp
ICD637	Unspecified abortion, complicated by genital tract and pelvic infection, unspecified	Abort NOS w pel inf-unsp
ICD638	Failed attempted abortion complicated by genital tract and pelvic infection	Attem abort w pelvic inf
ICD639	Genital tract and pelvic infection following abortion or ectopic and molar pregnancies	Postabortion gu infect
ICD640	Threatened abortion, unspecified as to episode of care or not applicable	Threatened abort-unspec
ICD641	Placenta previa without hemorrhage, unspecified as to episode of care or not applicable	Placenta previa-unspec
ICD642	Benign essential hypertension complicating pregnancy, childbirth, and the puerperium, unspecified as to episode of care or not applicable	Essen hyperten preg-unsp
ICD643	Mild hyperemesis gravidarum, unspecified as to episode of care or not applicable	Mild hyperem grav-unspec
ICD644	Threatened premature labor, unspecified as to episode of care or not applicable	Threat prem labor-unspec
ICD646	Papyraceous fetus, unspecified as to episode of care or not applicable	Papyraceous fetus-unspec
ICD647	Syphilis of mother, complicating pregnancy, childbirth, or the puerperium, unspecified as to episode of care or not applicable	Syphilis in preg-unspec
ICD648	Diabetes mellitus of mother, complicating pregnancy, childbirth, or the puerperium, unspecified as to episode of care or not applicable	Diabetes in preg-unspec
ICD649	Tobacco use disorder complicating pregnancy, childbirth, or the puerperium, unspecified as to episode of care or not applicable	Tobacco use disord-unsp
ICD650	Normal delivery	Normal delivery
ICD651	Twin pregnancy, unspecified as to episode of care or not applicable	Twin pregnancy-unspec
ICD652	Unstable lie, unspecified as to episode of care or not applicable	Unstable lie-unspecified
ICD653	Major abnormality of bony pelvis, not further specified, unspecified as to episode of care or not applicable	Pelvic deform NOS-unspec
ICD654	Congenital abnormalities of uterus, unspecified as to episode of care or not applicable	Cong abn uter preg-unsp
ICD655	Central nervous system malformation in fetus, unspecified as to episode of care or not applicable	Fetal cns malform-unspec
ICD656	Fetal-maternal hemorrhage, unspecified as to episode of care or not applicable	Fetal-maternal hem-unsp
ICD657	Polyhydramnios, unspecified as to episode of care or not applicable	Polyhydramnios-unspec
ICD658	Oligohydramnios, unspecified as to episode of care or not applicable	Oligohydramnios-unspec
ICD659	Failed mechanical induction of labor, unspecified as to episode of care or not applicable	Fail mechan induct-unsp
ICD660	Obstruction caused by malposition of fetus at onset of labor, unspecified as to episode of care or not applicable	Obstruct/fet malpos-unsp
ICD661	Primary uterine inertia, unspecified as to episode of care or not applicable	Prim uterine inert-unsp
ICD662	Prolonged first stage of labor, unspecified as to episode of care or not applicable	Prolonged 1st stage-unsp
ICD663	Prolapse of cord complicating labor and delivery, unspecified as to episode of care or not applicable	Cord prolapse-unspec
ICD664	First-degree perineal laceration, unspecified as to episode of care or not applicable	Del w 1 deg lacerat-unsp
ICD665	Rupture of uterus before onset of labor, unspecified as to episode of care or not applicable	Prelabor rupt uter-unsp
ICD666	Third-stage postpartum hemorrhage, unspecified as to episode of care or not applicable	Third-stage hem-unspec
ICD667	Retained placenta without hemorrhage, unspecified as to episode of care or not applicable	Retain placenta NOS-unsp
ICD668	Pulmonary complications of anesthesia or other sedation in labor and delivery, unspecified as to episode of care or not applicable	Pulm compl in del-unspec
ICD669	Maternal distress complicating labor and delivery, unspecified as to episode of care or not applicable	Maternal distress-unspec
ICD670	Major puerperal infection, unspecified as to episode of care or not applicable	Maj puerp inf NOS-unsp
ICD671	Varicose veins of legs complicating pregnancy and the puerperium, unspecified as to episode of care or not applicable	Varic vein leg preg-unsp
ICD672	Pyrexia of unknown origin during the puerperium, unspecified as to episode of care or not applicable	Puerperal pyrexia-unspec
ICD673	Obstetrical air embolism, unspecified as to episode of care or not applicable	Ob air embolism-unspec
ICD674	Cerebrovascular disorders in the puerperium, unspecified as to episode of care or not applicable	Puerp cerebvasc dis-unsp
ICD675	Infections of nipple associated with childbirth, unspecified as to episode of care or not applicable	Infect nipple preg-unsp
ICD676	Retracted nipple associated with childbirth, unspecified as to episode of care or not applicable	Retract nipple preg-unsp
ICD677	Late effect of complication of pregnancy, childbirth, and the puerperium	Late effct cmplcatn preg
ICD678	Fetal hematologic conditions, unspecified as to episode of care or not applicable	Fetal hematologic-unspec
ICD679	Maternal complications from in utero procedure, unspecified as to episode of care or not applicable	Mat comp in utero-unsp
ICD680	Carbuncle and furuncle of face	Carbuncle of face
ICD681	Cellulitis and abscess of finger, unspecified	Cellulitis, finger NOS
ICD682	Cellulitis and abscess of face	Cellulitis of face
ICD683	Acute lymphadenitis	Acute lymphadenitis
ICD684	Impetigo	Impetigo
ICD685	Pilonidal cyst with abscess	Pilonidal cyst w abscess
ICD686	Pyoderma, unspecified	Pyoderma NOS
ICD691	Diaper or napkin rash	Diaper or napkin rash
ICD692	Contact dermatitis and other eczema due to detergents	Detergent dermatitis
ICD693	Dermatitis due to drugs and medicines taken internally	Drug dermatitis NOS
ICD694	Dermatitis herpetiformis	Dermatitis herpetiformis
ICD695	Toxic erythema	Toxic erythema
ICD696	Psoriatic arthropathy	Psoriatic arthropathy
ICD697	Lichen planus	Lichen planus
ICD698	Pruritus ani	Pruritus ani
ICD700	Corns and callosities	Corns and callosities
ICD701	Circumscribed scleroderma	Circumscribe scleroderma
ICD702	Actinic keratosis	Actinic keratosis
ICD703	Ingrowing nail	Ingrowing nail
ICD704	Alopecia, unspecified	Alopecia NOS
ICD705	Anhidrosis	Anhidrosis
ICD706	Acne varioliformis	Acne varioliformis
ICD707	Pressure ulcer, unspecified site	Pressure ulcer, site NOS
ICD708	Allergic urticaria	Allergic urticaria
ICD709	Dyschromia, unspecified	Dyschromia, unspecified
ICD710	Systemic lupus erythematosus	Syst lupus erythematosus
ICD711	Pyogenic arthritis, site unspecified	Pyogen arthritis-unspec
ICD713	Arthropathy associated with other endocrine and metabolic disorders	Arthrop w endocr/met dis
ICD714	Rheumatoid arthritis	Rheumatoid arthritis
ICD715	Osteoarthrosis, generalized, site unspecified	General osteoarthrosis
ICD716	Kaschin-Beck disease, site unspecified	Kaschin-beck dis-unspec
ICD717	Old bucket handle tear of medial meniscus	Old bucket tear med men
ICD718	Articular cartilage disorder, site unspecified	Artic cartil dis-unspec
ICD719	Effusion of joint, site unspecified	Joint effusion-unspec
ICD720	Ankylosing spondylitis	Ankylosing spondylitis
ICD721	Cervical spondylosis without myelopathy	Cervical spondylosis
ICD722	Displacement of cervical intervertebral disc without myelopathy	Cervical disc displacmnt
ICD723	Spinal stenosis in cervical region	Cervical spinal stenosis
ICD724	Spinal stenosis, unspecified region	Spinal stenosis NOS
ICD725	Polymyalgia rheumatica	Polymyalgia rheumatica
ICD726	Adhesive capsulitis of shoulder	Adhesive capsulit shlder
ICD727	Synovitis and tenosynovitis, unspecified	Synovitis NOS
ICD728	Infective myositis	Infective myositis
ICD729	Rheumatism, unspecified and fibrositis	Rheumatism NOS
ICD730	Acute osteomyelitis, site unspecified	Ac osteomyelitis-unspec
ICD731	Osteitis deformans without mention of bone tumor	Osteitis deformans NOS
ICD732	Juvenile osteochondrosis of spine	Juv osteochondros spine
ICD733	Osteoporosis, unspecified	Osteoporosis NOS
ICD734	Flat foot	Flat foot
ICD735	Hallux valgus (acquired)	Hallux valgus
ICD736	Unspecified deformity of forearm, excluding fingers	Forearm deformity NOS
ICD737	Adolescent postural kyphosis	Adoles postural kyphosis
ICD738	Acquired deformity of nose	Acq nose deformity
ICD739	Nonallopathic lesions, head region	Somat dys head region
ICD740	Anencephalus	Anencephalus
ICD741	Spina bifida with hydrocephalus, unspecified region	Spin bif w hydroceph NOS
ICD742	Encephalocele	Encephalocele
ICD743	Clinical anophthalmos, unspecified	Clinic anophthalmos NOS
ICD744	Unspecified anomaly of ear with impairment of hearing	Ear anom NOS/impair hear
ICD745	Common truncus	Common truncus
ICD746	Congenital pulmonary valve anomaly, unspecified	Pulmonary valve anom NOS
ICD747	Patent ductus arteriosus	Patent ductus arteriosus
ICD748	Choanal atresia	Choanal atresia
ICD749	Cleft palate, unspecified	Cleft palate NOS
ICD750	Tongue tie	Tongue tie
ICD751	Meckel's diverticulum	Meckel's diverticulum
ICD752	Anomalies of ovaries	Anomalies of ovaries
ICD753	Renal agenesis and dysgenesis	Renal agenesis
ICD754	Congenital musculoskeletal deformities of skull, face, and jaw	Cong skull/face/jaw def
ICD755	Polydactyly, unspecified digits	Polydactyly NOS
ICD756	Anomalies of skull and face bones	Anomal skull/face bones
ICD757	Hereditary edema of legs	Hereditary edema of legs
ICD758	Down's syndrome	Down's syndrome
ICD759	Anomalies of spleen	Anomalies of spleen
ICD760	Maternal hypertensive disorders affecting fetus or newborn	Matern hyperten aff NB
ICD761	Incompetent cervix affecting fetus or newborn	Incompetnt cervix aff NB
ICD762	Placenta previa affecting fetus or newborn	Placenta previa aff NB
ICD763	Breech delivery and extraction affecting fetus or newborn	Breech del/extrac aff NB
ICD764	"Light-for-dates" without mention of fetal malnutrition, unspecified [weight]	Light-for-dates wtNOS
ICD765	Extreme immaturity, unspecified [weight]	Extreme immatur wtNOS
ICD766	Exceptionally large baby	Exceptionally large baby
ICD767	Subdural and cerebral hemorrhage	Cerebral hem at birth
ICD768	Fetal death from asphyxia or anoxia before onset of labor or at unspecified time	Fetal death-anoxia NOS
ICD769	Respiratory distress syndrome in newborn	Respiratory distress syn
ICD770	Congenital pneumonia	Congenital pneumonia
ICD771	Congenital rubella	Congenital rubella
ICD772	Fetal blood loss	NB fetal blood loss NEC
ICD773	Hemolytic disease of fetus or newborn due to Rh isoimmunization	NB hemolyt dis:rh isoimm
ICD774	Perinatal jaundice from hereditary hemolytic anemias	Perinat jaund-hered anem
ICD775	Syndrome of "infant of a diabetic mother"	Infant diabet mother syn
ICD776	Hemorrhagic disease of newborn	NB hemorrhagic disease
ICD778	Hydrops fetalis not due to isoimmunization	Hydrops fetalis no isoim
ICD779	Convulsions in newborn	Convulsions in newborn
ICD781	Abnormal involuntary movements	Abn involun movement NEC
ICD782	Disturbance of skin sensation	Skin sensation disturb
ICD783	Anorexia	Anorexia
ICD784	Headache	Headache
ICD785	Tachycardia, unspecified	Tachycardia NOS
ICD786	Respiratory abnormality, unspecified	Respiratory abnorm NOS
ICD788	Renal colic	Renal colic
ICD789	Abdominal pain, unspecified site	Abdmnal pain unspcf site
ICD791	Proteinuria	Proteinuria
ICD792	Nonspecific abnormal findings in cerebrospinal fluid	Abn fnd-cerebrospinal fl
ICD793	Nonspecific (abnormal) findings on radiological and other examination of skull and head	Nonsp abn fd-skull/head
ICD794	Abnormal function study of brain and central nervous system, unspecified	Abn cns funct study NOS
ICD795	Abnormal glandular Papanicolaou smear of cervix	Abn glandular pap smear
ICD796	Nonspecific abnormal toxicological findings	Abn toxicologic finding
ICD797	Senility without mention of psychosis	Senility w/o psychosis
ICD798	Sudden infant death syndrome	Sudden infant death synd
ICD800	Closed fracture of vault of skull without mention of intracranial injury, unspecified state of consciousness	Closed skull vault fx
ICD801	Closed fracture of base of skull without mention of intra cranial injury, unspecified state of consciousness	Clos skull base fracture
ICD802	Closed fracture of nasal bones	Nasal bone fx-closed
ICD803	Other closed skull fracture without mention of intracranial injury, unspecified state of consciousness	Close skull fracture NEC
ICD804	Closed fractures involving skull or face with other bones, without mention of intracranial injury, unspecified state of consciousness	Cl skul fx w oth bone fx
ICD805	Closed fracture of cervical vertebra, unspecified level	Fx cervical vert NOS-cl
ICD806	Closed fracture of C1-C4 level with unspecified spinal cord injury	C1-c4 fx-cl/cord inj NOS
ICD807	Closed fracture of rib(s), unspecified	Fracture rib NOS-closed
ICD808	Closed fracture of acetabulum	Fracture acetabulum-clos
ICD809	Fracture of bones of trunk, closed	Fracture trunk bone-clos
ICD810	Closed fracture of clavicle, unspecified part	Fx clavicle NOS-closed
ICD811	Closed fracture of scapula, unspecified part	Fx scapula NOS-closed
ICD812	Closed fracture of unspecified part of upper end of humerus	Fx up end humerus NOS-cl
ICD813	Closed fracture of upper end of forearm, unspecified	Fx upper forearm NOS-cl
ICD814	Closed fracture of carpal bone, unspecified	Fx carpal bone NOS-close
ICD815	Closed fracture of metacarpal bone(s), site unspecified	Fx metacarpal NOS-closed
ICD816	Closed fracture of phalanx or phalanges of hand, unspecified	Fx phalanx, hand NOS-cl
ICD817	Multiple closed fractures of hand bones	Multiple fx hand-closed
ICD818	Ill-defined closed fractures of upper limb	Fx arm mult/NOS-closed
ICD819	Multiple closed fractures involving both upper limbs, and upper limb with rib(s) and sternum	Fx arms w rib/sternum-cl
ICD820	Closed fracture of intracapsular section of neck of femur, unspecified	Fx femur intrcaps NOS-cl
ICD821	Closed fracture of unspecified part of femur	Fx femur NOS-closed
ICD822	Closed fracture of patella	Fracture patella-closed
ICD823	Closed fracture of upper end of tibia alone	Fx upper end tibia-close
ICD824	Fracture of medial malleolus, closed	Fx medial malleolus-clos
ICD825	Fracture of calcaneus, closed	Fracture calcaneus-close
ICD826	Closed fracture of one or more phalanges of foot	Fx phalanx, foot-closed
ICD827	Other, multiple and ill-defined fractures of lower limb, closed	Fx lower limb NEC-closed
ICD828	Closed multiple fractures involving both lower limbs, lower with upper limb, and lower limb(s) with rib(s) and sternum	Fx legs w arm/rib-closed
ICD829	Fracture of unspecified bone, closed	Fracture NOS-closed
ICD830	Closed dislocation of jaw	Dislocation jaw-closed
ICD831	Closed dislocation of shoulder, unspecified	Disloc shoulder NOS-clos
ICD832	Closed dislocation of elbow, unspecified	Dislocat elbow NOS-close
ICD833	Closed dislocation of wrist, unspecified part	Disloc wrist NOS-closed
ICD834	Closed dislocation of finger, unspecified part	Disl finger NOS-closed
ICD835	Closed dislocation of hip, unspecified site	Dislocat hip NOS-closed
ICD836	Tear of medial cartilage or meniscus of knee, current	Tear med menisc knee-cur
ICD837	Closed dislocation of ankle	Dislocation ankle-closed
ICD838	Closed dislocation of foot, unspecified	Dislocat foot NOS-closed
ICD839	Closed dislocation, cervical vertebra, unspecified	Disloc cerv vert NOS-cl
ICD840	Acromioclavicular (joint) (ligament) sprain	Sprain acromioclavicular
ICD841	Radial collateral ligament sprain	Sprain radial collat lig
ICD842	Sprain of wrist, unspecified site	Sprain of wrist NOS
ICD843	Iliofemoral (ligament) sprain	Sprain iliofemoral
ICD844	Sprain of lateral collateral ligament of knee	Sprain lateral coll lig
ICD845	Sprain of ankle, unspecified site	Sprain of ankle NOS
ICD846	Sprain of lumbosacral (joint) (ligament)	Sprain lumbosacral
ICD847	Sprain of neck	Sprain of neck
ICD848	Sprain of septal cartilage of nose	Sprain of nasal septum
ICD850	Concussion with no loss of consciousness	Concussion w/o coma
ICD851	Cortex (cerebral) contusion without mention of open intracranial wound, unspecified state of consciousness	Cerebral cortx contusion
ICD852	Subarachnoid hemorrhage following injury without mention of open intracranial wound, unspecified state of consciousness	Traum subarachnoid hem
ICD853	Other and unspecified intracranial hemorrhage following injury without mention of open intracranial wound, unspecified state of consciousness	Traumatic brain hem NEC
ICD854	Intracranial injury of other and unspecified nature without mention of open intracranial wound, unspecified state of consciousness	Brain injury NEC
ICD860	Traumatic pneumothorax without mention of open wound into thorax	Traum pneumothorax-close
ICD861	Unspecified injury of heart without mention of open wound into thorax	Heart injury NOS-closed
ICD862	Injury to diaphragm, without mention of open wound into cavity	Diaphragm injury-closed
ICD863	Injury to stomach, without mention of open wound into cavity	Stomach injury-closed
ICD864	Injury to liver without mention of open wound into cavity, unspecified injury	Liver injury NOS-closed
ICD865	Injury to spleen without mention of open wound into cavity, unspecified injury	Spleen injury NOS-closed
ICD866	Injury to kidney without mention of open wound into cavity, unspecified injury	Kidney injury NOS-closed
ICD867	Injury to bladder and urethra, without mention of open wound into cavity	Bladder/urethra inj-clos
ICD868	Injury to other intra-abdominal organs without mention of open wound into cavity, unspecified intra-abdominal organ	Intra-abdom inj NOS-clos
ICD869	Internal injury to unspecified or ill-defined organs without mention of open wound into cavity	Internal inj NOS-closed
ICD870	Laceration of skin of eyelid and periocular area	Lac eyelid skn/perioculr
ICD871	Ocular laceration without prolapse of intraocular tissue	Ocular lac w/o prolapse
ICD872	Open wound of external ear, unspecified site, without mention of complication	Opn wound extern ear NOS
ICD873	Open wound of scalp, without mention of complication	Open wound of scalp
ICD874	Open wound of larynx with trachea, without mention of complication	Opn wnd larynx w trachea
ICD875	Open wound of chest (wall), without mention of complication	Open wound of chest
ICD876	Open wound of back, without mention of complication	Open wound of back
ICD877	Open wound of buttock, without mention of complication	Open wound of buttock
ICD878	Open wound of penis, without mention of complication	Open wound of penis
ICD879	Open wound of breast, without mention of complication	Open wound of breast
ICD880	Open wound of shoulder region, without mention of complication	Open wound of shoulder
ICD881	Open wound of forearm, without mention of complication	Open wound of forearm
ICD882	Open wound of hand except finger(s) alone, without mention of complication	Open wound of hand
ICD883	Open wound of finger(s), without mention of complication	Open wound of finger
ICD884	Multiple and unspecified open wound of upper limb, without mention of complication	Open wound arm mult/NOS
ICD885	Traumatic amputation of thumb (complete)(partial), without mention of complication	Amputation thumb
ICD886	Traumatic amputation of other finger(s) (complete) (partial), without mention of complication	Amputation finger
ICD887	Traumatic amputation of arm and hand (complete) (partial), unilateral, below elbow, without mention of complication	Amput below elb, unilat
ICD890	Open wound of hip and thigh, without mention of complication	Open wound of hip/thigh
ICD891	Open wound of knee, leg [except thigh], and ankle, without mention of complication	Open wnd knee/leg/ankle
ICD892	Open wound of foot except toe(s) alone, without mention of complication	Open wound of foot
ICD893	Open wound of toe(s), without mention of complication	Open wound of toe
ICD894	Multiple and unspecified open wound of lower limb, without mention of complication	Open wound of leg NEC
ICD895	Traumatic amputation of toe(s) (complete) (partial), without mention of complication	Amputation toe
ICD896	Traumatic amputation of foot (complete) (partial), unilateral, without mention of complication	Amputation foot, unilat
ICD897	Traumatic amputation of leg(s) (complete) (partial), unilateral, below knee, without mention of complication	Amput below knee, unilat
ICD900	Injury to carotid artery, unspecified	Injur carotid artery NOS
ICD901	Injury to thoracic aorta	Injury thoracic aorta
ICD902	Injury to abdominal aorta	Injury abdominal aorta
ICD903	Injury to axillary vessel(s), unspecified	Inj axillary vessel NOS
ICD904	Injury to common femoral artery	Inj common femoral arter
ICD905	Late effect of fracture of skull and face bones	Late effec skull/face fx
ICD906	Late effect of open wound of head, neck, and trunk	Lt eff opn wnd head/trnk
ICD907	Late effect of intracranial injury without mention of skull fracture	Lt eff intracranial inj
ICD908	Late effect of internal injury to chest	Late eff int injur chest
ICD909	Late effect of poisoning due to drug, medicinal or biological substance	Late eff drug poisoning
ICD910	Abrasion or friction burn of face, neck, and scalp except eye, without mention of infection	Abrasion head
ICD911	Abrasion or friction burn of trunk, without mention of infection	Abrasion trunk
ICD912	Abrasion or friction burn of shoulder and upper arm, without mention of infection	Abrasion shoulder/arm
ICD913	Abrasion or friction burn of elbow, forearm, and wrist, without mention of infection	Abrasion forearm
ICD914	Abrasion or friction burn of hand(s) except finger(s) alone, without mention of infection	Abrasion hand
ICD915	Abrasion or friction burn of finger(s), without mention of infection	Abrasion finger
ICD916	Abrasion or friction burn of hip, thigh, leg, and ankle, without mention of infection	Abrasion hip & leg
ICD917	Abrasion or friction burn of foot and toe(s), without mention of infection	Abrasion foot & toe
ICD918	Superficial injury of eyelids and periocular area	Superfic inj periocular
ICD919	Abrasion or friction burn of other, multiple, and unspecified sites, without mention of infection	Abrasion NEC
ICD920	Contusion of face, scalp, and neck except eye(s)	Contusion face/scalp/nck
ICD921	Black eye, not otherwise specified	Black eye NOS
ICD922	Contusion of breast	Contusion of breast
ICD923	Contusion of shoulder region	Contusion shoulder reg
ICD924	Contusion of thigh	Contusion of thigh
ICD926	Crushing injury of external genitalia	Crush inj ext genitalia
ICD927	Crushing injury of shoulder region	Crush inj shoulder reg
ICD928	Crushing injury of thigh	Crushing injury thigh
ICD929	Crushing injury of multiple sites, not elsewhere classified	Crush inj mult site NEC
ICD930	Corneal foreign body	Corneal foreign body
ICD931	Foreign body in ear	Foreign body in ear
ICD932	Foreign body in nose	Foreign body in nose
ICD933	Foreign body in pharynx	Foreign body in pharynx
ICD934	Foreign body in trachea	Foreign body in trachea
ICD935	Foreign body in mouth	Foreign body in mouth
ICD936	Foreign body in intestine and colon	FB in intestine & colon
ICD937	Foreign body in anus and rectum	Foreign body anus/rectum
ICD938	Foreign body in digestive system, unspecified	Foreign body GI NOS
ICD939	Foreign body in bladder and urethra	FB bladder & urethra
ICD940	Chemical burn of eyelids and periocular area	Chemical burn periocular
ICD941	Burn of unspecified degree of face and head, unspecified site	Burn NOS head-unspec
ICD942	Burn of unspecified degree of trunk, unspecified site	Burn NOS trunk-unspec
ICD943	Burn of unspecified degree of upper limb, except wrist and hand, unspecified site	Burn NOS arm-unspec
ICD944	Burn of unspecified degree of hand, unspecified site	Burn NOS hand-unspec
ICD945	Burn of unspecified degree of lower limb [leg], unspecified site	Burn NOS leg-unspec
ICD946	Burns of multiple specified sites, unspecified degree	Burn NOS multiple site
ICD947	Burn of mouth and pharynx	Burn of mouth & pharynx
ICD948	Burn [any degree] involving less than 10 percent of body surface with third degree burn, less than 10 percent or unspecified	Bdy brn < 10%/3d deg NOS
ICD949	Burn of unspecified site, unspecified degree	Burn NOS
ICD950	Optic nerve injury	Optic nerve injury
ICD951	Injury to oculomotor nerve	Injury oculomotor nerve
ICD952	C1-C4 level with unspecified spinal cord injury	C1-c4 spin cord inj NOS
ICD953	Injury to cervical nerve root	Cervical root injury
ICD954	Injury to cervical sympathetic nerve, excluding shoulder and pelvic girdles	Inj cerv sympath nerve
ICD955	Injury to axillary nerve	Injury axillary nerve
ICD956	Injury to sciatic nerve	Injury sciatic nerve
ICD957	Injury to superficial nerves of head and neck	Inj superf nerv head/nck
ICD958	Air embolism	Air embolism
ICD960	Poisoning by penicillins	Poisoning-penicillins
ICD961	Poisoning by sulfonamides	Poisoning-sulfonamides
ICD962	Poisoning by adrenal cortical steroids	Pois-corticosteroids
ICD963	Poisoning by antiallergic and antiemetic drugs	Pois-antiallrg/antiemet
ICD964	Poisoning by iron and its compounds	Poisoning-iron/compounds
ICD965	Poisoning by opium (alkaloids), unspecified	Poisoning-opium NOS
ICD966	Poisoning by oxazolidine derivatives	Poison-oxazolidine deriv
ICD967	Poisoning by barbiturates	Poisoning-barbiturates
ICD968	Poisoning by central nervous system muscle-tone depressants	Pois-cns muscle depress
ICD969	Poisoning by antidepressant, unspecified	Poison-antidepresnt NOS
ICD970	Poisoning by analeptics	Poisoning-analeptics
ICD971	Poisoning by parasympathomimetics (cholinergics)	Pois-parasympathomimetic
ICD972	Poisoning by cardiac rhythm regulators	Pois-card rhythm regulat
ICD973	Poisoning by antacids and antigastric secretion drugs	Pois-antacid/antigastric
ICD974	Poisoning by mercurial diuretics	Pois-mercurial diuretics
ICD975	Poisoning by oxytocic agents	Poisoning-oxytocic agent
ICD976	Poisoning by local anti-infectives and anti-inflammatory drugs	Pois-local anti-infect
ICD977	Poisoning by dietetics	Poisoning-dietetics
ICD978	Poisoning by BCG vaccine	Poisoning-bcg vaccine
ICD979	Poisoning by smallpox vaccine	Poison-smallpox vaccine
ICD980	Toxic effect of ethyl alcohol	Toxic eff ethyl alcohol
ICD981	Toxic effect of petroleum products	Toxic eff petroleum prod
ICD982	Toxic effect of benzene and homologues	Toxic effect benzene
ICD983	Toxic effect of corrosive aromatics	Tox eff corrosive aromat
ICD984	Toxic effect of inorganic lead compounds	Tx eff inorg lead compnd
ICD985	Toxic effect of mercury and its compounds	Toxic effect mercury
ICD986	Toxic effect of carbon monoxide	Tox eff carbon monoxide
ICD987	Toxic effect of liquefied petroleum gases	Toxic eff liq petrol gas
ICD988	Toxic effect of fish and shellfish eaten as food	Toxic eff fish/shellfish
ICD989	Toxic effect of hydrocyanic acid and cyanides	Toxic effect cyanides
ICD990	Effects of radiation, unspecified	Effects radiation NOS
ICD991	Frostbite of face	Frostbite of face
ICD992	Heat stroke and sunstroke	Heat stroke & sunstroke
ICD993	Barotrauma, otitic	Barotrauma, otitic
ICD994	Effects of lightning	Effects of lightning
ICD995	Other anaphylactic reaction	Other anaphylactic react
ICD996	Mechanical complication of unspecified cardiac device, implant, and graft	Malfunc card dev/grf NOS
ICD997	Nervous system complication, unspecified	Nervous syst complc NOS
ICD998	Postoperative shock, unspecified	Postoperative shock, NOS
ICD999	Generalized vaccinia as a complication of medical care, not elsewhere classified	Generalized vaccinia
ICDE00	Civilian activity done for income or pay	Civilian activity-income
ICDE01	Activity involving exercise machines primarily for muscle strengthening	Muscle strength mach
ICDE03	Unspecified activity	Activity NOS
ICDE80	Railway accident involving collision with rolling stock and injuring railway employee	RR collision NOS-employ
ICDE81	Motor vehicle traffic accident involving collision with train injuring driver of motor vehicle other than motorcycle	Mv-train coll-driver
ICDE82	Nontraffic accident involving motor-driven snow vehicle injuring driver of motor vehicle other than motorcycle	Snow veh acc-driver
ICDE83	Accident to watercraft causing submersion injuring occupant of small boat, unpowered	Boat acc w submers-unpow
ICDE84	Accident to powered aircraft at takeoff or landing injuring occupant of spacecraft	Tk off/land-spcrft
ICDE85	Accidental poisoning by heroin	Acc poison-heroin
ICDE86	Accidental poisoning by alcoholic beverages	Acc poisn-alcohol bevrag
ICDE87	Accidental cut, puncture, perforation or hemorrhage during surgical operation	Acc cut/hem in surgery
ICDE88	Accidental fall on or from escalator	Fall on escalator
ICDE89	Explosion caused by conflagration in private dwelling	Privat dwell fire-explos
ICDE90	Accident caused by excessive heat due to weather conditions	Excessive heat: weather
ICDE91	Accidental drowning and submersion while water-skiing	Water-skiing accident
ICDE92	Accidents caused by powered lawn mower	Acc-powered lawn mower
ICDE93	Penicillins causing adverse effects in therapeutic use	Adv eff penicillins
ICDE94	Analeptics causing adverse effects in therapeutic use	Adv eff analeptics
ICDE95	Suicide and self-inflicted poisoning by analgesics, antipyretics, and antirheumatics	Poison-analgesics
ICDE96	Unarmed fight or brawl	Unarmed fight or brawl
ICDE97	Injury due to legal intervention by firearms	Legal intervent-firearm
ICDE98	Poisoning by analgesics, antipyretics, and antirheumatics, undetermined whether accidentally or purposely inflicted	Undeterm pois-analgesics
ICDE99	Injury due to war operations from gasoline bomb	War inj:gasoline bomb
ICDV01	Contact with or exposure to cholera	Cholera contact
ICDV02	Carrier or suspected carrier of cholera	Cholera carrier
ICDV03	Need for prophylactic vaccination and inoculation against cholera alone	Vaccin for cholera
ICDV04	Need for prophylactic vaccination and inoculation against poliomyelitis	Vaccin for poliomyelitis
ICDV05	Need for prophylactic vaccination and inoculation against arthropod-borne viral encephalitis	Arbovirus enceph vaccin
ICDV06	Need for prophylactic vaccination and inoculation against cholera with typhoid-paratyphoid [cholera + TAB]	Vaccin for cholera + tab
ICDV07	Need for isolation	Prophylactic isolation
ICDV08	Asymptomatic human immunodeficiency virus [HIV] infection status	Asymp hiv infectn status
ICDV09	Infection with microorganisms resistant to penicillins	Inf mcrg rstn pncllins
ICDV10	Personal history of malignant neoplasm of gastrointestinal tract, unspecified	Hx of GI malignancy NOS
ICDV11	Personal history of schizophrenia	Hx of schizophrenia
ICDV12	Personal history of unspecified infectious and parasitic disease	Prsnl hst unsp nfct prst
ICDV13	Personal history of unspecified urinary disorder	Prsnl hst urnr dsrd unsp
ICDV14	Personal history of allergy to penicillin	Hx-penicillin allergy
ICDV16	Family history of malignant neoplasm of gastrointestinal tract	Family hx-gi malignancy
ICDV17	Family history of psychiatric condition	Fam hx-psychiatric cond
ICDV18	Family history of diabetes mellitus	Fam hx-diabetes mellitus
ICDV19	Family history of blindness or visual loss	Family hx-blindness
ICDV20	Health supervision of foundling	Foundling health care
ICDV21	Period of rapid growth in childhood	Rapid childhood growth
ICDV22	Supervision of normal first pregnancy	Supervis normal 1st preg
ICDV23	Supervision of high-risk pregnancy with history of infertility	Preg w hx of infertility
ICDV24	Postpartum care and examination immediately after delivery	Postpart care after del
ICDV26	Tuboplasty or vasoplasty after previous sterilization	Tuboplasty or vasoplasty
ICDV27	Outcome of delivery, single liveborn	Deliver-single liveborn
ICDV28	Antenatal screening for chromosomal anomalies by amniocentesis	Screening-chromosom anom
ICDV29	Observation for suspected infectious condition	NB obsrv suspct infect
ICDV30	Single liveborn, born in hospital, delivered without mention of cesarean section	Single lb in-hosp w/o cs
ICDV31	Twin birth, mate liveborn, born in hospital, delivered without mention of cesarean section	Twin-mate lb-hosp w/o cs
ICDV32	Twin birth, mate stillborn, born in hospital, delivered without mention of cesarean section	Twin-mate sb-hosp w/o cs
ICDV33	Twin birth, unspecified whether mate liveborn or stillborn, born in hospital, delivered without mention of cesarean section	Twin-NOS-in hosp w/o cs
ICDV34	Other multiple birth (three or more), mates all liveborn, born in hospital, delivered without mention of cesarean section	Oth mult lb-hosp w/o cs
ICDV35	Other multiple birth (three or more), mates all still born, born in hospital, delivered without mention of cesarean section	Oth mult sb-hosp w/o cs
ICDV36	Other multiple birth (three or more), mates liveborn and stillborn, born in hospital, delivered without mention of cesarean section	Mult lb/sb-in hos w/o cs
ICDV37	Other multiple birth (three or more), unspecified whether mates liveborn or stillborn, born in hospital, delivered without mention of cesarean section	Mult brth NOS-hos w/o cs
ICDV39	Liveborn, unspecified whether single, twin or multiple, born in hospital, delivered without mention of cesarean section	Liveborn NOS-hosp w/o cs
ICDV40	Mental and behavioral problems with learning	Problems with learning
ICDV41	Problems with sight	Problems with sight
ICDV42	Kidney replaced by transplant	Kidney transplant status
ICDV43	Eye globe replaced by other means	Eye replacement NEC
ICDV44	Tracheostomy status	Tracheostomy status
ICDV45	Unspecified cardiac device in situ	Status cardc dvce unspcf
ICDV46	Dependence on aspirator	Dependence on aspirator
ICDV47	Deficiencies of internal organs	Intern organ deficiency
ICDV48	Deficiencies of head	Deficiencies of head
ICDV49	Deficiencies of limbs	Deficiencies of limbs
ICDV50	Elective hair transplant for purposes other than remedying health states	Hair transplant
ICDV51	Encounter for breast reconstruction following mastectomy	Brst reconst fol mastect
ICDV52	Fitting and adjustment of artificial arm (complete) (partial)	Fitting artificial arm
ICDV55	Attention to tracheostomy	Atten to tracheostomy
ICDV56	Encounter for extracorporeal dialysis	Renal dialysis encounter
ICDV57	Care involving breathing exercises	Breathing exercises
ICDV58	Encounter for radiotherapy	Radiotherapy encounter
ICDV60	Lack of housing	Lack of housing
ICDV62	Unemployment	Unemployment
ICDV63	Residence remote from hospital or other health care facility	Home remote from hospitl
ICDV64	Vaccination not carried out, unspecified reason	No vaccination NOS
ICDV65	Healthy person accompanying sick person	Healthy person w sick
ICDV66	Convalescence following surgery	Surgical convalescence
ICDV67	Follow-up examination, following surgery, unspecified	Follow-up surgery NOS
ICDV69	Lack of physical exercise	Lack of physical exercse
ICDV70	Routine general medical examination at a health care facility	Routine medical exam
ICDV72	Examination of eyes and vision	Eye & vision examination
ICDV73	Screening examination for poliomyelitis	Screening-poliomyelitis
ICDV74	Screening examination for cholera	Screening for cholera
ICDV75	Screening examination for rickettsial diseases	Screen-rickettsial dis
ICDV76	Special screening for malignant neoplasms of respiratory organs	Screen mal neop-resp org
ICDV77	Screening for thyroid disorders	Screen-thyroid disorder
ICDV78	Screening for iron deficiency anemia	Screen-iron defic anemia
ICDV79	Screening for depression	Screening for depression
ICDV81	Screening for ischemic heart disease	Scrn-ischemic heart dis
ICDV82	Screening for skin conditions	Screen for skin cond
ICDV85	Body Mass Index less than 19, adult	BMI less than 19,adult
ICDV86	Estrogen receptor positive status [ER+]	Estrogen recep pstv stat
ICDV91	Twin gestation, unspecified number of placenta, unspecified number of amniotic sacs	Twin gest-plac/sac NOS
KO	Cholera due to vibrio cholerae el tor	Cholera d/t vib el tor
KO	Cholera, unspecified	Cholera NOS
KO	Paratyphoid fever A	Paratyphoid fever a
KO	Paratyphoid fever B	Paratyphoid fever b
KO	Paratyphoid fever C	Paratyphoid fever c
KO	Paratyphoid fever, unspecified	Paratyphoid fever NOS
KO	Salmonella septicemia	Salmonella septicemia
KO	Localized salmonella infection, unspecified	Local salmonella inf NOS
KO	Salmonella meningitis	Salmonella meningitis
KO	Salmonella pneumonia	Salmonella pneumonia
KO	Salmonella arthritis	Salmonella arthritis
KO	Salmonella osteomyelitis	Salmonella osteomyelitis
KO	Other localized salmonella infections	Local salmonella inf NEC
KO	Other specified salmonella infections	Salmonella infection NEC
KO	Salmonella infection, unspecified	Salmonella infection NOS
KO	Shigella flexneri	Shigella flexneri
KO	Shigella boydii	Shigella boydii
KO	Shigella sonnei	Shigella sonnei
KO	Other specified shigella infections	Shigella infection NEC
KO	Shigellosis, unspecified	Shigellosis NOS
KO	Botulism food poisoning	Botulism food poisoning
KO	Food poisoning due to Clostridium perfringens (C. welchii)	Food pois d/t c. perfrin
KO	Food poisoning due to other Clostridia	Food pois: clostrid NEC
KO	Food poisoning due to Vibrio parahaemolyticus	Food pois: v. parahaem
KO	Food poisoning due to Vibrio vulnificus	Food poisn d/t v. vulnif
KO	Other bacterial food poisoning	Bact food poisoning NEC
KO	Food poisoning, unspecified	Food poisoning NOS
KO	Chronic intestinal amebiasis without mention of abscess	Chr amebiasis w/o absces
KO	Amebic nondysenteric colitis	Amebic nondysent colitis
KO	Amebic liver abscess	Amebic liver abscess
KO	Amebic lung abscess	Amebic lung abscess
KO	Amebic brain abscess	Amebic brain abscess
KO	Amebic skin ulceration	Amebic skin ulceration
KO	Amebic infection of other sites	Amebic infection NEC
KO	Amebiasis, unspecified	Amebiasis NOS
KO	Giardiasis	Giardiasis
KO	Coccidiosis	Coccidiosis
KO	Intestinal trichomoniasis	Intest trichomoniasis
KO	Cryptosporidiosis	Cryptosporidiosis
KO	Cyclosporiasis	Cyclosporiasis
KO	Other specified protozoal intestinal diseases	Protozoal intest dis NEC
KO	Unspecified protozoal intestinal disease	Protozoal intest dis NOS
KO	Intestinal infection due to enteropathogenic E. coli	Int inf e coli entrpath
KO	Intestinal infection due to enterotoxigenic E. coli	Int inf e coli entrtoxgn
KO	Intestinal infection due to enteroinvasive E. coli	Int inf e coli entrnvsv
KO	Intestinal infection due to enterohemorrhagic E. coli	Int inf e coli entrhmrg
KO	Intestinal infection due to other intestinal E. coli infections	Int inf e coli spcf NEC
KO	Intestinal infection due to arizona group of paracolon bacilli	Arizona enteritis
KO	Intestinal infection due to aerobacter aerogenes	Aerobacter enteritis
KO	Intestinal infection due to proteus (mirabilis) (morganii)	Proteus enteritis
KO	Intestinal infection due to staphylococcus	Staphylococc enteritis
KO	Intestinal infection due to pseudomonas	Pseudomonas enteritis
KO	Intestinal infection due to campylobacter	Int infec campylobacter
KO	Intestinal infection due to yersinia enterocolitica	Int inf yrsnia entrcltca
KO	Intestinal infection due to Clostridium difficile	Int inf clstrdium dfcile
KO	Intestinal infection due to other anaerobes	Intes infec oth anerobes
KO	Intestinal infection due to other gram-negative bacteria	Int inf oth grm neg bctr
KO	Intestinal infection due to other organisms	Bacterial enteritis NEC
KO	Bacterial enteritis, unspecified	Bacterial enteritis NOS
KO	Enteritis due to rotavirus	Intes infec rotavirus
KO	Enteritis due to adenovirus	Intes infec adenovirus
KO	Enteritis due to norwalk virus	Int inf norwalk virus
KO	Enteritis due to other small round viruses [SRV's]	Int inf oth sml rnd vrus
KO	Enteritis due to calicivirus	Enteritis d/t calicivirs
KO	Enteritis due to astrovirus	Intes infec astrovirus
KO	Enteritis due to enterovirus nec	Int inf enterovirus NEC
KO	Enteritis due to other viral enteritis	Other viral intes infec
KO	Intestinal infection due to other organism, not elsewhere classified	Viral enteritis NOS
KO	Colitis, enteritis, and gastroenteritis of presumed infectious origin	Enteritis of infect orig
KO	Infectious diarrhea	Infectious diarrhea NOS
KO	Diarrhea of presumed infectious origin	Diarrhea of infect orig
KO	Primary tuberculous infection, bacteriological or histological examination not done	Prim TB complex-no exam
KO	Primary tuberculous infection, bacteriological or histological examination unknown (at present)	Prim TB complex-exm unkn
KO	Primary tuberculous infection, tubercle bacilli found (in sputum) by microscopy	Prim TB complex-micro dx
KO	Primary tuberculous infection, tubercle bacilli not found (in sputum) by microscopy, but found by bacterial culture	Prim TB complex-cult dx
KO	Primary tuberculous infection, tubercle bacilli not found by bacteriological examination, but tuberculosis confirmed histologically	Prim TB complex-histo dx
KO	Primary tuberculous infection, tubercle bacilli not found by bacteriological or histological examination, but tuberculosis confirmed by other methods [inoculation of animals]	Prim TB complex-oth test
KO	Tuberculous pleurisy in primary progressive tuberculosis, unspecified	Prim TB pleurisy-unspec
KO	Tuberculous pleurisy in primary progressive tuberculosis, bacteriological or histological examination not done	Prim TB pleurisy-no exam
KO	Tuberculous pleurisy in primary progressive tuberculosis, bacteriological or histological examination unknown (at present)	Prim TB pleur-exam unkn
KO	Tuberculous pleurisy in primary progressive tuberculosis, tubercle bacilli found (in sputum) by microscopy	Prim TB pleuris-micro dx
KO	Tuberculous pleurisy in primary progressive tuberculosis, tubercle bacilli not found (in sputum) by microscopy, but found by bacterial culture	Prim TB pleurisy-cult dx
KO	Tuberculous pleurisy in primary progressive tuberculosis, tubercle bacilli not found by bacteriological examination, but tuberculosis confirmed histologically	Prim TB pleuris-histo dx
KO	Tuberculous pleurisy in primary progressive tuberculosis, tubercle bacilli not found by bacteriological or histological examination, but tuberculosis confirmed by other methods [inoculation of animals]	Prim TB pleuris-oth test
KO	Other primary progressive tuberculosis, unspecified	Prim prog TB NEC-unspec
KO	Other primary progressive tuberculosis, bacteriological or histological examination not done	Prim prog TB NEC-no exam
KO	Other primary progressive tuberculosis, bacteriological or histological examination unknown (at present)	Prim pr TB NEC-exam unkn
KO	Other primary progressive tuberculosis, tubercle bacilli found (in sputum) by microscopy	Prim prg TB NEC-micro dx
KO	Other primary progressive tuberculosis, tubercle bacilli not found (in sputum) by microscopy, but found by bacterial culture	Prim prog TB NEC-cult dx
KO	Other primary progressive tuberculosis, tubercle bacilli not found by bacteriological examination, but tuberculosis confirmed histologically	Prim prg TB NEC-histo dx
KO	Other primary progressive tuberculosis, tubercle bacilli not found by bacteriological or histological examination, but tuberculosis confirmed by other methods [inoculation of animals]	Prim prg TB NEC-oth test
KO	Primary tuberculous infection, unspecified, unspecified	Primary TB NOS-unspec
KO	Primary tuberculous infection, unspecified, bacteriological or histological examination not done	Primary TB NOS-no exam
KO	Primary tuberculous infection, unspecified, bacteriological or histological examination unknown (at present)	Primary TB NOS-exam unkn
KO	Primary tuberculous infection, unspecified, tubercle bacilli found (in sputum) by microscopy	Primary TB NOS-micro dx
KO	Primary tuberculous infection, unspecified, tubercle bacilli not found (in sputum) by microscopy, but found by bacterial culture	Primary TB NOS-cult dx
KO	Primary tuberculous infection, unspecified, tubercle bacilli not found by bacteriological examination, but tuberculosis confirmed histologically	Primary TB NOS-histo dx
KO	Primary tuberculous infection, unspecified, tubercle bacilli not found by bacteriological or histological examination, but tuberculosis confirmed by other methods [inoculation of animals]	Primary TB NOS-oth test
KO	Tuberculosis of lung, infiltrative, bacteriological or histological examination not done	TB lung infiltr-no exam
KO	Tuberculosis of lung, infiltrative, bacteriological or histological examination unknown (at present)	TB lung infiltr-exm unkn
KO	Tuberculosis of lung, infiltrative, tubercle bacilli found (in sputum) by microscopy	TB lung infiltr-micro dx
KO	Tuberculosis of lung, infiltrative, tubercle bacilli not found (in sputum) by microscopy, but found by bacterial culture	TB lung infiltr-cult dx
KO	Tuberculosis of lung, infiltrative, tubercle bacilli not found by bacteriological examination, but tuberculosis confirmed histologically	TB lung infiltr-histo dx
KO	Tuberculosis of lung, infiltrative, tubercle bacilli not found bacteriological or histological examination, but tuberculosis confirmed by other methods [inoculation of animals]	TB lung infiltr-oth test
KO	Tuberculosis of lung, nodular, unspecified	TB lung nodular-unspec
KO	Tuberculosis of lung, nodular, bacteriological or histological examination not done	TB lung nodular-no exam
KO	Tuberculosis of lung, nodular, bacteriological or histological examination unknown (at present)	TB lung nodul-exam unkn
KO	Tuberculosis of lung, nodular, tubercle bacilli found (in sputum) by microscopy	TB lung nodular-micro dx
KO	Tuberculosis of lung, nodular, tubercle bacilli not found (in sputum) by microscopy, but found by bacterial culture	TB lung nodular-cult dx
KO	Tuberculosis of lung, nodular, tubercle bacilli not found by bacteriological examination, but tuberculosis confirmed histologically	TB lung nodular-histo dx
KO	Tuberculosis of lung, nodular, tubercle bacilli not found by bacteriological or histological examination, but tuberculosis confirmed by other methods [inoculation of animals]	TB lung nodular-oth test
KO	Tuberculosis of lung with cavitation, unspecified	TB lung w cavity-unspec
KO	Tuberculosis of lung with cavitation, bacteriological or histological examination not done	TB lung w cavity-no exam
KO	Tuberculosis of lung with cavitation, bacteriological or histological examination unknown (at present)	TB lung cavity-exam unkn
KO	Tuberculosis of lung with cavitation, tubercle bacilli found (in sputum) by microscopy	TB lung w cavit-micro dx
KO	Tuberculosis of lung with cavitation, tubercle bacilli not found (in sputum) by microscopy, but found by bacterial culture	TB lung w cavity-cult dx
KO	Tuberculosis of lung with cavitation, tubercle bacilli not found by bacteriological examination, but tuberculosis confirmed histologically	TB lung w cavit-histo dx
KO	Tuberculosis of lung with cavitation, tubercle bacilli not found by bacteriological or histological examination, but tuberculosis confirmed by other methods [inoculation of animals]	TB lung w cavit-oth test
KO	Tuberculosis of bronchus, unspecified	TB of bronchus-unspec
KO	Tuberculosis of bronchus, bacteriological or histological examination not done	TB of bronchus-no exam
KO	Tuberculosis of bronchus, bacteriological or histological examination unknown (at present)	TB of bronchus-exam unkn
KO	Tuberculosis of bronchus, tubercle bacilli found (in sputum) by microscopy	TB of bronchus-micro dx
KO	Tuberculosis of bronchus, tubercle bacilli not found (in sputum) by microscopy, but found in bacterial culture	TB of bronchus-cult dx
KO	Tuberculosis of bronchus, tubercle bacilli not found by bacteriological examination, but tuberculosis confirmed histologically	TB of bronchus-histo dx
KO	Tuberculosis of bronchus, tubercle bacilli not found by bacteriological or histological examination, but tuberculosis confirmed by other methods [inoculation of animals]	TB of bronchus-oth test
KO	Tuberculous fibrosis of lung, unspecified	TB lung fibrosis-unspec
KO	Tuberculous fibrosis of lung, bacteriological or histological examination not done	TB lung fibrosis-no exam
KO	Tuberculous fibrosis of lung, bacteriological or histological examination unknown (at present)	TB lung fibros-exam unkn
KO	Tuberculous fibrosis of lung, tubercle bacilli found (in sputum) by microscopy	TB lung fibros-micro dx
KO	Tuberculous fibrosis of lung, tubercle bacilli not found (in sputum) by microscopy, but found by bacterial culture	TB lung fibrosis-cult dx
KO	Tuberculous fibrosis of lung, tubercle bacilli not found by bacteriological examination, but tuberculosis confirmed histologically	TB lung fibros-histo dx
KO	Tuberculous fibrosis of lung, tubercle bacilli not found by bacteriological or histological examination, but tuberculosis confirmed by other methods [inoculation of animals]	TB lung fibros-oth test
KO	Tuberculous bronchiectasis, unspecified	TB bronchiectasis-unspec
KO	Tuberculous bronchiectasis, bacteriological or histological examination not done	TB bronchiect-no exam
KO	Tuberculous bronchiectasis, bacteriological or histological examination unknown (at present)	TB bronchiect-exam unkn
KO	Tuberculous bronchiectasis, tubercle bacilli found (in sputum) by microscopy	TB bronchiect-micro dx
KO	Tuberculous bronchiectasis, tubercle bacilli not found (in sputum) by microscopy, but found by bacterial culture	TB bronchiect-cult dx
KO	Tuberculous bronchiectasis, tubercle bacilli not found by bacteriological examination, but tuberculosis confirmed histologically	TB bronchiect-histo dx
KO	Tuberculous bronchiectasis, tubercle bacilli not found by bacteriological or histological examination, but tuberculosis confirmed by other methods [inoculation of animals]	TB bronchiect-oth test
KO	Tuberculous pneumonia [any form], unspecified	TB pneumonia-unspec
KO	Tuberculous pneumonia [any form], bacteriological or histological examination not done	TB pneumonia-no exam
KO	Tuberculous pneumonia [any form], bacteriological or histological examination unknown (at present)	TB pneumonia-exam unkn
KO	Tuberculous pneumonia [any form], tubercle bacilli found (in sputum) by microscopy	TB pneumonia-micro dx
KO	Tuberculous pneumonia [any form], tubercle bacilli not found (in sputum) by microscopy, but found by bacterial culture	TB pneumonia-cult dx
KO	Tuberculous pneumonia [any form], tubercle bacilli not found by bacteriological examination, but tuberculosis confirmed histologically	TB pneumonia-histo dx
KO	Tuberculous pneumonia [any form], tubercle bacilli not found by bacteriological or histological examination, but tuberculosis confirmed by other methods [inoculation of animals]	TB pneumonia-oth test
KO	Tuberculous pneumothorax, unspecified	TB pneumothorax-unspec
KO	Tuberculous pneumothorax, bacteriological or histological examination not done	TB pneumothorax-no exam
KO	Tuberculous pneumothorax, bacteriological or histological examination unknown (at present)	TB pneumothorx-exam unkn
KO	Tuberculous pneumothorax, tubercle bacilli found (in sputum) by microscopy	TB pneumothorax-micro dx
KO	Tuberculous pneumothorax, tubercle bacilli not found (in sputum) by microscopy, but found by bacterial culture	TB pneumothorax-cult dx
KO	Tuberculous pneumothorax, tubercle bacilli not found by bacteriological examination, but tuberculosis confirmed histologically	TB pneumothorax-histo dx
KO	Tuberculous pneumothorax, tubercle bacilli not found by bacteriological or histological examination, but tuberculosis confirmed by other methods [inoculation of animals]	TB pneumothorax-oth test
KO	Other specified pulmonary tuberculosis, unspecified	Pulmonary TB NEC-unspec
KO	Other specified pulmonary tuberculosis, bacteriological or histological examination not done	Pulmonary TB NEC-no exam
KO	Other specified pulmonary tuberculosis, bacteriological or histological examination unknown (at present)	Pulmon TB NEC-exam unkn
KO	Other specified pulmonary tuberculosis, tubercle bacilli found (in sputum) by microscopy	Pulmon TB NEC-micro dx
KO	Other specified pulmonary tuberculosis, tubercle bacilli not found (in sputum) by microscopy, but found by bacterial culture	Pulmon TB NEC-cult dx
KO	Other specified pulmonary tuberculosis, tubercle bacilli not found by bacteriological examination, but tuberculosis confirmed histologically	Pulmon TB NEC-histo dx
KO	Other specified pulmonary tuberculosis, tubercle bacilli not found by bacteriological or histological examination, but tuberculosis confirmed by other methods [inoculation of animals]	Pulmon TB NEC-oth test
KO	Pulmonary tuberculosis, unspecified, unspecified	Pulmonary TB NOS-unspec
KO	Pulmonary tuberculosis, unspecified, bacteriological or histological examination not done	Pulmonary TB NOS-no exam
KO	Pulmonary tuberculosis, unspecified, bacteriological or histological examination unknown (at present)	Pulmon TB NOS-exam unkn
KO	Pulmonary tuberculosis, unspecified, tubercle bacilli found (in sputum) by microscopy	Pulmon TB NOS-micro dx
KO	Pulmonary tuberculosis, unspecified, tubercle bacilli not found (in sputum) by microscopy, but found by bacterial culture	Pulmon TB NOS-cult dx
KO	Pulmonary tuberculosis, unspecified, tubercle bacilli not found by bacteriological examination, but tuberculosis confirmed histologically	Pulmon TB NOS-histo dx
KO	Pulmonary tuberculosis, unspecified, tubercle bacilli not found by bacteriological or histological examination, but tuberculosis confirmed by other methods [inoculation of animals]	Pulmon TB NOS-oth test
KO	Tuberculous pleurisy, bacteriological or histological examination not done	TB pleurisy-no exam
KO	Tuberculous pleurisy, bacteriological or histological examination unknown (at present)	TB pleurisy-exam unkn
KO	Tuberculous pleurisy, tubercle bacilli found (in sputum) by microscopy	TB pleurisy-micro dx
KO	Tuberculous pleurisy, tubercle bacilli not found (in sputum) by microscopy, but found by bacterial culture	TB pleurisy-cult dx
KO	Tuberculous pleurisy, tubercle bacilli not found by bacteriological examination, but tuberculosis confirmed histologically	TB pleurisy-histolog dx
KO	Tuberculous pleurisy, tubercle bacilli not found by bacteriological or histological examination, but tuberculosis confirmed by other methods [inoculation of animals]	TB pleurisy-oth test
KO	Tuberculosis of intrathoracic lymph nodes, unspecified	TB thoracic nodes-unspec
KO	Tuberculosis of intrathoracic lymph nodes, bacteriological or histological examination not done	TB thorax node-no exam
KO	Tuberculosis of intrathoracic lymph nodes, bacteriological or histological examination unknown (at present)	TB thorax node-exam unkn
KO	Tuberculosis of intrathoracic lymph nodes, tubercle bacilli found (in sputum) by microscopy	TB thorax node-micro dx
KO	Tuberculosis of intrathoracic lymph nodes, tubercle bacilli not found (in sputum) by microscopy, but found by bacterial culture	TB thorax node-cult dx
KO	Tuberculosis of intrathoracic lymph nodes, tubercle bacilli not found by bacteriological examination, but tuberculosis confirmed histologically	TB thorax node-histo dx
KO	Tuberculosis of intrathoracic lymph nodes, tubercle bacilli not found by bacteriological or histological examination, but tuberculosis confirmed by other methods [inoculation of animals]	TB thorax node-oth test
KO	Isolated tracheal or bronchial tuberculosis, unspecified	Isol tracheal tb-unspec
KO	Isolated tracheal or bronchial tuberculosis, bacteriological or histological examination not done	Isol tracheal tb-no exam
KO	Isolated tracheal or bronchial tuberculosis, bacteriological or histological examination unknown (at present)	Isol trach tb-exam unkn
KO	Isolated tracheal or bronchial tuberculosis, tubercle bacilli found (in sputum) by microscopy	Isolat trach tb-micro dx
KO	Isolated tracheal or bronchial tuberculosis, tubercle bacilli not found (in sputum) by microscopy, but found by bacterial culture	Isol tracheal tb-cult dx
KO	Isolated tracheal or bronchial tuberculosis, tubercle bacilli not found by bacteriological examination, but tuberculosis confirmed histologically	Isolat trach tb-histo dx
KO	Isolated tracheal or bronchial tuberculosis, tubercle bacilli not found by bacteriological or histological examination, but tuberculosis confirmed by other methods [inoculation of animals]	Isolat trach tb-oth test
KO	Tuberculous laryngitis, unspecified	TB laryngitis-unspec
KO	Tuberculous laryngitis, bacteriological or histological examination not done	TB laryngitis-no exam
KO	Tuberculous laryngitis, bacteriological or histological examination unknown (at present)	TB laryngitis-exam unkn
KO	Tuberculous laryngitis, tubercle bacilli found (in sputum) by microscopy	TB laryngitis-micro dx
KO	Tuberculous laryngitis, tubercle bacilli not found (in sputum) by microscopy, but found by bacterial culture	TB laryngitis-cult dx
KO	Tuberculous laryngitis, tubercle bacilli not found by bacteriological examination, but tuberculosis confirmed histologically	TB laryngitis-histo dx
KO	Tuberculous laryngitis, tubercle bacilli not found by bacteriological or histological examination, but tuberculosis confirmed by other methods [inoculation of animals]	TB laryngitis-oth test
KO	Other specified respiratory tuberculosis, unspecified	Resp TB NEC-unspec
KO	Other specified respiratory tuberculosis, bacteriological or histological examination not done	Resp TB NEC-no exam
KO	Other specified respiratory tuberculosis, bacteriological or histological examination unknown (at present)	Resp TB NEC-exam unkn
KO	Other specified respiratory tuberculosis, tubercle bacilli found (in sputum) by microscopy	Resp TB NEC-micro dx
KO	Other specified respiratory tuberculosis, tubercle bacilli not found (in sputum) by microscopy, but found by bacterial culture	Resp TB NEC-cult dx
KO	Other specified respiratory tuberculosis, tubercle bacilli not found by bacteriological examination, but tuberculosis confirmed histologically	Resp TB NEC-histo dx
KO	Other specified respiratory tuberculosis, tubercle bacilli not found by bacteriological or histological examination, but tuberculosis confirmed by other methods [inoculation of animals]	Resp TB NEC-oth test
KO	Tuberculous meningitis, bacteriological or histological examination not done	TB meningitis-no exam
KO	Tuberculous meningitis, bacteriological or histological examination unknown (at present)	TB meningitis-exam unkn
KO	Tuberculous meningitis, tubercle bacilli found (in sputum) by microscopy	TB meningitis-micro dx
KO	Tuberculous meningitis, tubercle bacilli not found (in sputum) by microscopy, but found by bacterial culture	TB meningitis-cult dx
KO	Tuberculous meningitis, tubercle bacilli not found by bacteriological examination, but tuberculosis confirmed histologically	TB meningitis-histo dx
KO	Tuberculous meningitis, tubercle bacilli not found by bacteriological or histological examination, but tuberculosis confirmed by other methods [inoculation of animals]	TB meningitis-oth test
KO	Tuberculoma of meninges, unspecified	Tubrclma meninges-unspec
KO	Tuberculoma of meninges, bacteriological or histological examination not done	Tubrclma mening-no exam
KO	Tuberculoma of meninges, bacteriological or histological examination unknown (at present)	Tubrclma menin-exam unkn
KO	Tuberculoma of meninges, tubercle bacilli found (in sputum) by microscopy	Tubrclma mening-micro dx
KO	Tuberculoma of meninges, tubercle bacilli not found (in sputum) by microscopy, but found by bacterial culture	Tubrclma mening-cult dx
KO	Tuberculoma of meninges, tubercle bacilli not found by bacteriological examination, but tuberculosis confirmed histologically	Tubrclma mening-histo dx
KO	Tuberculoma of meninges, tubercle bacilli not found by bacteriological or histological examination, but tuberculosis confirmed by other methods [inoculation of animals]	Tubrclma mening-oth test
KO	Tuberculoma of brain, unspecified	Tuberculoma brain-unspec
KO	Tuberculoma of brain, bacteriological or histological examination not done	Tubrcloma brain-no exam
KO	Tuberculoma of brain, bacteriological or histological examination unknown (at present)	Tubrclma brain-exam unkn
KO	Tuberculoma of brain, tubercle bacilli found (in sputum) by microscopy	Tubrcloma brain-micro dx
KO	Tuberculoma of brain, tubercle bacilli not found (in sputum) by microscopy, but found by bacterial culture	Tubrcloma brain-cult dx
KO	Tuberculoma of brain, tubercle bacilli not found by bacteriological examination, but tuberculosis confirmed histologically	Tubrcloma brain-histo dx
KO	Tuberculoma of brain, tubercle bacilli not found by bacteriological or histological examination, but tuberculosis confirmed by other methods [inoculation of animals]	Tubrcloma brain-oth test
KO	Tuberculous abscess of brain, unspecified	TB brain abscess-unspec
KO	Tuberculous abscess of brain, bacteriological or histological examination not done	TB brain abscess-no exam
KO	Tuberculous abscess of brain, bacteriological or histological examination unknown (at present)	TB brain absc-exam unkn
KO	Tuberculous abscess of brain, tubercle bacilli found (in sputum) by microscopy	TB brain absc-micro dx
KO	Tuberculous abscess of brain, tubercle bacilli not found (in sputum) by microscopy, but found by bacterial culture	TB brain abscess-cult dx
KO	Tuberculous abscess of brain, tubercle bacilli not found by bacteriological examination, but tuberculosis confirmed histologically	TB brain absc-histo dx
KO	Tuberculous abscess of brain, tubercle bacilli not found by bacteriological or histological examination, but tuberculosis confirmed by other methods [inoculation of animals]	TB brain absc-oth test
KO	Tuberculoma of spinal cord, unspecified	Tubrclma sp cord-unspec
KO	Tuberculoma of spinal cord, bacteriological or histological examination not done	Tubrclma sp cord-no exam
KO	Tuberculoma of spinal cord, bacteriological or histological examination unknown (at present)	Tubrclma sp cd-exam unkn
KO	Tuberculoma of spinal cord, tubercle bacilli found (in sputum) by microscopy	Tubrclma sp crd-micro dx
KO	Tuberculoma of spinal cord, tubercle bacilli not found (in sputum) by microscopy, but found by bacterial culture	Tubrclma sp cord-cult dx
KO	Tuberculoma of spinal cord, tubercle bacilli not found by bacteriological examination, but tuberculosis confirmed histologically	Tubrclma sp crd-histo dx
KO	Tuberculoma of spinal cord, tubercle bacilli not found by bacteriological or histological examination, but tuberculosis confirmed by other methods [inoculation of animals]	Tubrclma sp crd-oth test
KO	Tuberculous abscess of spinal cord, unspecified	TB sp crd abscess-unspec
KO	Tuberculous abscess of spinal cord, bacteriological or histological examination not done	TB sp crd absc-no exam
KO	Tuberculous abscess of spinal cord, bacteriological or histological examination unknown (at present)	TB sp crd absc-exam unkn
KO	Tuberculous abscess of spinal cord, tubercle bacilli found (in sputum) by microscopy	TB sp crd absc-micro dx
KO	Tuberculous abscess of spinal cord, tubercle bacilli not found (in sputum) by microscopy, but found by bacterial culture	TB sp crd absc-cult dx
KO	Tuberculous abscess of spinal cord, tubercle bacilli not found by bacteriological examination, but tuberculosis confirmed histologically	TB sp crd absc-histo dx
KO	Tuberculous abscess of spinal cord, tubercle bacilli not found by bacteriological or histological examination, but tuberculosis confirmed by other methods [inoculation of animals]	TB sp crd absc-oth test
KO	Tuberculous encephalitis or myelitis, unspecified	TB encephalitis-unspec
KO	Tuberculous encephalitis or myelitis, bacteriological or histological examination not done	TB encephalitis-no exam
KO	Tuberculous encephalitis or myelitis, bacteriological or histological examination unknown (at present)	TB encephalit-exam unkn
KO	Tuberculous encephalitis or myelitis, tubercle bacilli found (in sputum) by microscopy	TB encephalitis-micro dx
KO	Tuberculous encephalitis or myelitis, tubercle bacilli not found (in sputum) by microscopy, but found by bacterial culture	TB encephalitis-cult dx
KO	Tuberculous encephalitis or myelitis, tubercle bacilli not found by bacteriological examination, but tuberculosis confirmed histologically	TB encephalitis-histo dx
KO	Tuberculous encephalitis or myelitis, tubercle bacilli not found by bacteriological or histological examination, but tuberculosis confirmed by other methods [inoculation of animals]	TB encephalitis-oth test
KO	Other specified tuberculosis of central nervous system, unspecified	Cns TB NEC-unspec
KO	Other specified tuberculosis of central nervous system, bacteriological or histological examination not done	Cns TB NEC-no exam
KO	Other specified tuberculosis of central nervous system, bacteriological or histological examination unknown (at present)	Cns TB NEC-exam unkn
KO	Other specified tuberculosis of central nervous system, tubercle bacilli found (in sputum) by microscopy	Cns TB NEC-micro dx
KO	Other specified tuberculosis of central nervous system, tubercle bacilli not found (in sputum) by microscopy, but found by bacterial culture	Cns TB NEC-cult dx
KO	Other specified tuberculosis of central nervous system, tubercle bacilli not found by bacteriological examination, but tuberculosis confirmed histologically	Cns TB NEC-histo dx
KO	Other specified tuberculosis of central nervous system, tubercle bacilli not found by bacteriological or histological examination, but tuberculosis confirmed by other methods [inoculation of animals]	Cns TB NEC-oth test
KO	Unspecified tuberculosis of central nervous system, unspecified	Cns TB NOS-unspec
KO	Unspecified tuberculosis of central nervous system, bacteriological or histological examination not done	Cns TB NOS-no exam
KO	Unspecified tuberculosis of central nervous system, bacteriological or histological examination unknown (at present)	Cns TB NOS-exam unkn
KO	Unspecified tuberculosis of central nervous system, tubercle bacilli found (in sputum) by microscopy	Cns TB NOS-micro dx
KO	Unspecified tuberculosis of central nervous system, tubercle bacilli not found (in sputum) by microscopy, but found by bacterial culture	Cns TB NOS-cult dx
KO	Unspecified tuberculosis of central nervous system, tubercle bacilli not found by bacteriological examination, but tuberculosis confirmed histologically	Cns TB NOS-histo dx
KO	Unspecified tuberculosis of central nervous system, tubercle bacilli not found by bacteriological or histological examination, but tuberculosis confirmed by other methods [inoculation of animals]	Cns TB NOS-oth test
KO	Tuberculous peritonitis, bacteriological or histological examination not done	TB peritonitis-no exam
KO	Tuberculous peritonitis, bacteriological or histological examination unknown (at present)	TB peritonitis-exam unkn
KO	Tuberculous peritonitis, tubercle bacilli found (in sputum) by microscopy	TB peritonitis-micro dx
KO	Tuberculous peritonitis, tubercle bacilli not found (in sputum) by microscopy, but found by bacterial culture	TB peritonitis-cult dx
KO	Tuberculous peritonitis, tubercle bacilli not found by bacteriological examination, but tuberculosis confirmed histologically	TB peritonitis-histo dx
KO	Tuberculous peritonitis, tubercle bacilli not found by bacteriological or histological examination, but tuberculosis confirmed by other methods [inoculation of animals]	TB peritonitis-oth test
KO	Other tuberculosis of intestines, peritoneum, and mesenteric glands, unspecified	Intestinal TB NEC-unspec
KO	Other tuberculosis of intestines, peritoneum, and mesenteric glands, bacteriological or histological examination not done	Intestin TB NEC-no exam
KO	Other tuberculosis of intestines, peritoneum, and mesenteric glands, bacteriological or histological examination unknown (at present)	Intest TB NEC-exam unkn
KO	Other tuberculosis of intestines, peritoneum, and mesenteric glands, tubercle bacilli found (in sputum) by microscopy	Intestin TB NEC-micro dx
KO	Other tuberculosis of intestines, peritoneum, and mesenteric glands, tubercle bacilli not found (in sputum) by microscopy, but found by bacterial culture	Intestin TB NEC-cult dx
KO	Other tuberculosis of intestines, peritoneum, and mesenteric glands, tubercle bacilli not found by bacteriological examination, but tuberculosis confirmed histologically	Intestin TB NEC-histo dx
KO	Other tuberculosis of intestines, peritoneum, and mesenteric glands, tubercle bacilli not found by bacteriological or histological examination, but tuberculosis confirmed by other methods [inoculation of animals]	Intestin TB NEC-oth test
KO	Tuberculosis of vertebral column, bacteriological or histological examination not done	TB of vertebra-no exam
KO	Tuberculosis of vertebral column, bacteriological or histological examination unknown (at present)	TB of vertebra-exam unkn
KO	Tuberculosis of vertebral column, tubercle bacilli found (in sputum) by microscopy	TB of vertebra-micro dx
KO	Tuberculosis of vertebral column, tubercle bacilli not found (in sputum) by microscopy, but found by bacterial culture	TB of vertebra-cult dx
KO	Tuberculosis of vertebral column, tubercle bacilli not found by bacteriological examination, but tuberculosis confirmed histologically	TB of vertebra-histo dx
KO	Tuberculosis of vertebral column, tubercle bacilli not found by bacteriological or histological examination, but tuberculosis confirmed by other methods [inoculation of animals]	TB of vertebra-oth test
KO	Tuberculosis of hip, unspecified	TB of hip-unspec
KO	Tuberculosis of hip, bacteriological or histological examination not done	TB of hip-no exam
KO	Tuberculosis of hip, bacteriological or histological examination unknown (at present)	TB of hip-exam unkn
KO	Tuberculosis of hip, tubercle bacilli found (in sputum) by microscopy	TB of hip-micro dx
KO	Tuberculosis of hip, tubercle bacilli not found (in sputum) by microscopy, but found by bacterial culture	TB of hip-cult dx
KO	Tuberculosis of hip, tubercle bacilli not found by bacteriological examination, but tuberculosis confirmed histologically	TB of hip-histo dx
KO	Tuberculosis of hip, tubercle bacilli not found by bacteriological or histological examination, but tuberculosis confirmed by other methods [inoculation of animals]	TB of hip-oth test
KO	Tuberculosis of knee, unspecified	TB of knee-unspec
KO	Tuberculosis of knee, bacteriological or histological examination not done	TB of knee-no exam
KO	Tuberculosis of knee, bacteriological or histological examination unknown (at present)	TB of knee-exam unkn
KO	Tuberculosis of knee, tubercle bacilli found (in sputum) by microscopy	TB of knee-micro dx
KO	Tuberculosis of knee, tubercle bacilli not found (in sputum) by microscopy, but found by bacterial culture	TB of knee-cult dx
KO	Tuberculosis of knee, tubercle bacilli not found by bacteriological examination, but tuberculosis confirmed histologically	TB of knee-histo dx
KO	Tuberculosis of knee, tubercle bacilli not found by bacteriological or histological examination, but tuberculosis confirmed by other methods [inoculation of animals]	TB of knee-oth test
KO	Tuberculosis of limb bones, unspecified	TB of limb bones-unspec
KO	Tuberculosis of limb bones, bacteriological or histological examination not done	TB limb bones-no exam
KO	Tuberculosis of limb bones, bacteriological or histological examination unknown (at present)	TB limb bones-exam unkn
KO	Tuberculosis of limb bones, tubercle bacilli found (in sputum) by microscopy	TB limb bones-micro dx
KO	Tuberculosis of limb bones, tubercle bacilli not found (in sputum) by microscopy, but found by bacterial culture	TB limb bones-cult dx
KO	Tuberculosis of limb bones, tubercle bacilli not found by bacteriological examination, but tuberculosis confirmed histologically	TB limb bones-histo dx
KO	Tuberculosis of limb bones, tubercle bacilli not found by bacteriological or histological examination, but tuberculosis confirmed by other methods [inoculation of animals]	TB limb bones-oth test
KO	Tuberculosis of mastoid, unspecified	TB of mastoid-unspec
KO	Tuberculosis of mastoid, bacteriological or histological examination not done	TB of mastoid-no exam
KO	Tuberculosis of mastoid, bacteriological or histological examination unknown (at present)	TB of mastoid-exam unkn
KO	Tuberculosis of mastoid, tubercle bacilli found (in sputum) by microscopy	TB of mastoid-micro dx
KO	Tuberculosis of mastoid, tubercle bacilli not found (in sputum) by microscopy, but found by bacterial culture	TB of mastoid-cult dx
KO	Tuberculosis of mastoid, tubercle bacilli not found by bacteriological examination, but tuberculosis confirmed histologically	TB of mastoid-histo dx
KO	Tuberculosis of mastoid, tubercle bacilli not found by bacteriological or histological examination, but tuberculosis confirmed by other methods [inoculation of animals]	TB of mastoid-oth test
KO	Tuberculosis of other specified bone, unspecified	TB of bone NEC-unspec
KO	Tuberculosis of other specified bone, bacteriological or histological examination not done	TB of bone NEC-no exam
KO	Tuberculosis of other specified bone, bacteriological or histological examination unknown (at present)	TB of bone NEC-exam unkn
KO	Tuberculosis of other specified bone, tubercle bacilli found (in sputum) by microscopy	TB of bone NEC-micro dx
KO	Tuberculosis of other specified bone, tubercle bacilli not found (in sputum) by microscopy, but found by bacterial culture	TB of bone NEC-cult dx
KO	Tuberculosis of other specified bone, tubercle bacilli not found by bacteriological examination, but tuberculosis confirmed histologically	TB of bone NEC-histo dx
KO	Tuberculosis of other specified bone, tubercle bacilli not found by bacteriological or histological examination, but tuberculosis confirmed by other methods [inoculation of animals]	TB of bone NEC-oth test
KO	Tuberculosis of other specified joint, unspecified	TB of joint NEC-unspec
KO	Tuberculosis of other specified joint, bacteriological or histological examination not done	TB of joint NEC-no exam
KO	Tuberculosis of other specified joint, bacteriological or histological examination unknown (at present)	TB joint NEC-exam unkn
KO	Tuberculosis of other specified joint, tubercle bacilli found (in sputum) by microscopy	TB of joint NEC-micro dx
KO	Tuberculosis of other specified joint, tubercle bacilli not found (in sputum) by microscopy, but found by bacterial culture	TB of joint NEC-cult dx
KO	Tuberculosis of other specified joint, tubercle bacilli not found by bacteriological examination, but tuberculosis confirmed histologically	TB of joint NEC-histo dx
KO	Tuberculosis of other specified joint, tubercle bacilli not found by bacteriological or histological examination, but tuberculosis confirmed by other methods [inoculation of animals]	TB of joint NEC-oth test
KO	Tuberculosis of unspecified bones and joints, unspecified	TB bone/joint NOS-unspec
KO	Tuberculosis of unspecified bones and joints, bacteriological or histological examination not done	TB bone/jt NOS-no exam
KO	Tuberculosis of unspecified bones and joints, bacteriological or histological examination unknown (at present)	TB bone/jt NOS-exam unkn
KO	Tuberculosis of unspecified bones and joints, tubercle bacilli found (in sputum) by microscopy	TB bone/jt NOS-micro dx
KO	Tuberculosis of unspecified bones and joints, tubercle bacilli not found (in sputum) by microscopy, but found by bacterial culture	TB bone/jt NOS-cult dx
KO	Tuberculosis of unspecified bones and joints, tubercle bacilli not found by bacteriological examination, but tuberculosis confirmed histologically	TB bone/jt NOS-histo dx
KO	Tuberculosis of unspecified bones and joints, tubercle bacilli not found by bacteriological or histological examination, but tuberculosis confirmed by other methods [inoculation of animals]	TB bone/jt NOS-oth test
KO	Tuberculosis of kidney, bacteriological or histological examination not done	TB of kidney-no exam
KO	Tuberculosis of kidney, bacteriological or histological examination unknown (at present)	TB of kidney-exam unkn
KO	Tuberculosis of kidney, tubercle bacilli found (in sputum) by microscopy	TB of kidney-micro dx
KO	Tuberculosis of kidney, tubercle bacilli not found (in sputum) by microscopy, but found by bacterial culture	TB of kidney-cult dx
KO	Tuberculosis of kidney, tubercle bacilli not found by bacteriological examination, but tuberculosis confirmed histologically	TB of kidney-histo dx
KO	Tuberculosis of kidney, tubercle bacilli not found by bacteriological or histological examination, but tuberculosis confirmed by other methods [inoculation of animals]	TB of kidney-oth test
KO	Tuberculosis of bladder, unspecified	TB of bladder-unspec
KO	Tuberculosis of bladder, bacteriological or histological examination not done	TB of bladder-no exam
KO	Tuberculosis of bladder, bacteriological or histological examination unknown (at present)	TB of bladder-exam unkn
KO	Tuberculosis of bladder, tubercle bacilli found (in sputum) by microscopy	TB of bladder-micro dx
KO	Tuberculosis of bladder, tubercle bacilli not found (in sputum) by microscopy, but found by bacterial culture	TB of bladder-cult dx
KO	Tuberculosis of bladder, tubercle bacilli not found by bacteriological examination, but tuberculosis confirmed histologically	TB of bladder-histo dx
KO	Tuberculosis of bladder, tubercle bacilli not found by bacteriological or histological examination, but tuberculosis confirmed by other methods [inoculation of animals]	TB of bladder-oth test
KO	Tuberculosis of ureter, unspecified	TB of ureter-unspec
KO	Tuberculosis of ureter, bacteriological or histological examination not done	TB of ureter-no exam
KO	Tuberculosis of ureter, bacteriological or histological examination unknown (at present)	TB of ureter-exam unkn
KO	Tuberculosis of ureter, tubercle bacilli found (in sputum) by microscopy	TB of ureter-micro dx
KO	Tuberculosis of ureter, tubercle bacilli not found (in sputum) by microscopy, but found by bacterial culture	TB of ureter-cult dx
KO	Tuberculosis of ureter, tubercle bacilli not found by bacteriological examination, but tuberculosis confirmed histologically	TB of ureter-histo dx
KO	Tuberculosis of ureter, tubercle bacilli not found by bacteriological or histological examination, but tuberculosis confirmed by other methods [inoculation of animals]	TB of ureter-oth test
KO	Tuberculosis of other urinary organs, unspecified	TB urinary NEC-unspec
KO	Tuberculosis of other urinary organs, bacteriological or histological examination not done	TB urinary NEC-no exam
KO	Tuberculosis of other urinary organs, bacteriological or histological examination unknown (at present)	TB urinary NEC-exam unkn
KO	Tuberculosis of other urinary organs, tubercle bacilli found (in sputum) by microscopy	TB urinary NEC-micro dx
KO	Tuberculosis of other urinary organs, tubercle bacilli not found (in sputum) by microscopy, but found by bacterial culture	TB urinary NEC-cult dx
KO	Tuberculosis of other urinary organs, tubercle bacilli not found by bacteriological examination, but tuberculosis confirmed histologically	TB urinary NEC-histo dx
KO	Tuberculosis of other urinary organs, tubercle bacilli not found by bacteriological or histological examination, but tuberculosis confirmed by other methods [inoculation of animals]	TB urinary NEC-oth test
KO	Tuberculosis of epididymis, unspecified	TB epididymis-unspec
KO	Tuberculosis of epididymis, bacteriological or histological examination not done	TB epididymis-no exam
KO	Tuberculosis of epididymis, bacteriological or histological examination unknown (at present)	TB epididymis-exam unkn
KO	Tuberculosis of epididymis, tubercle bacilli found (in sputum) by microscopy	TB epididymis-micro dx
KO	Tuberculosis of epididymis, tubercle bacilli not found (in sputum) by microscopy, but found by bacterial culture	TB epididymis-cult dx
KO	Tuberculosis of epididymis, tubercle bacilli not found by bacteriological examination, but tuberculosis confirmed histologically	TB epididymis-histo dx
KO	Tuberculosis of epididymis, tubercle bacilli not found by bacteriological or histological examination, but tuberculosis confirmed by other methods [inoculation of animals]	TB epididymis-oth test
KO	Tuberculosis of other male genital organs, unspecified	TB male genit NEC-unspec
KO	Tuberculosis of other male genital organs, bacteriological or histological examination not done	TB male gen NEC-no exam
KO	Tuberculosis of other male genital organs, bacteriological or histological examination unknown (at present)	TB male gen NEC-ex unkn
KO	Tuberculosis of other male genital organs, tubercle bacilli found (in sputum) by microscopy	TB male gen NEC-micro dx
KO	Tuberculosis of other male genital organs, tubercle bacilli not found (in sputum) by microscopy, but found by bacterial culture	TB male gen NEC-cult dx
KO	Tuberculosis of other male genital organs, tubercle bacilli not found by bacteriological examination, but tuberculosis confirmed histologically	TB male gen NEC-histo dx
KO	Tuberculosis of other male genital organs, tubercle bacilli not found by bacteriological or histological examination, but tuberculosis confirmed by other methods [inoculation of animals]	TB male gen NEC-oth test
KO	Tuberculous oophoritis and salpingitis, unspecified	TB ovary & tube-unspec
KO	Tuberculous oophoritis and salpingitis, bacteriological or histological examination not done	TB ovary & tube-no exam
KO	Tuberculous oophoritis and salpingitis, bacteriological or histological examination unknown (at present)	TB ovary/tube-exam unkn
KO	Tuberculous oophoritis and salpingitis, tubercle bacilli found (in sputum) by microscopy	TB ovary & tube-micro dx
KO	Tuberculous oophoritis and salpingitis, tubercle bacilli not found (in sputum) by microscopy, but found by bacterial culture	TB ovary & tube-cult dx
KO	Tuberculous oophoritis and salpingitis, tubercle bacilli not found by bacteriological examination, but tuberculosis confirmed histologically	TB ovary & tube-histo dx
KO	Tuberculous oophoritis and salpingitis, tubercle bacilli not found by bacteriological or histological examination, but tuberculosis confirmed by other methods [inoculation of animals]	TB ovary & tube-oth test
KO	Tuberculosis of other female genital organs, unspecified	TB female gen NEC-unspec
KO	Tuberculosis of other female genital organs, bacteriological or histological examination not done	TB fem gen NEC-no exam
KO	Tuberculosis of other female genital organs, bacteriological or histological examination unknown (at present)	TB fem gen NEC-exam unkn
KO	Tuberculosis of other female genital organs, tubercle bacilli found (in sputum) by microscopy	TB fem gen NEC-micro dx
KO	Tuberculosis of other female genital organs, tubercle bacilli not found (in sputum) by microscopy, but found by bacterial culture	TB fem gen NEC-cult dx
KO	Tuberculosis of other female genital organs, tubercle bacilli not found by bacteriological examination, but tuberculosis confirmed histologically	TB fem gen NEC-histo dx
KO	Tuberculosis of other female genital organs, tubercle bacilli not found by bacteriological or histological examination, but tuberculosis confirmed by other methods [inoculation of animals]	TB fem gen NEC-oth test
KO	Genitourinary tuberculosis, unspecified, unspecified	Gu TB NOS-unspec
KO	Genitourinary tuberculosis, unspecified, bacteriological or histological examination not done	Gu TB NOS-no exam
KO	Genitourinary tuberculosis, unspecified, bacteriological or histological examination unknown (at present)	Gu TB NOS-exam unkn
KO	Genitourinary tuberculosis, unspecified, tubercle bacilli found (in sputum) by microscopy	Gu TB NOS-micro dx
KO	Genitourinary tuberculosis, unspecified, tubercle bacilli not found (in sputum) by microscopy, but found by bacterial culture	Gu TB NOS-cult dx
KO	Genitourinary tuberculosis, unspecified, tubercle bacilli not found by bacteriological examination, but tuberculosis confirmed histologically	Gu TB NOS-histo dx
KO	Genitourinary tuberculosis, unspecified, tubercle bacilli not found by bacteriological or histological examination, but tuberculosis confirmed by other methods [inoculation of animals]	Gu TB NOS-oth test
KO	Tuberculosis of skin and subcutaneous cellular tissue, bacteriological or histological examination not done	TB skin/subcut-no exam
KO	Tuberculosis of skin and subcutaneous cellular tissue, bacteriological or histological examination unknown (at present)	TB skin/subcut-exam unkn
KO	Tuberculosis of skin and subcutaneous cellular tissue, tubercle bacilli found (in sputum) by microscopy	TB skin/subcut-micro dx
KO	Tuberculosis of skin and subcutaneous cellular tissue, tubercle bacilli not found (in sputum) by microscopy, but found by bacterial culture	TB skin/subcut-cult dx
KO	Tuberculosis of skin and subcutaneous cellular tissue, tubercle bacilli not found by bacteriological examination, but tuberculosis confirmed histologically	TB skin/subcut-histo dx
KO	Tuberculosis of skin and subcutaneous cellular tissue, tubercle bacilli not found by bacteriological or histological examination, but tuberculosis confirmed by other methods [inoculation of animals]	TB skin/subcut-oth test
KO	Erythema nodosum with hypersensitivity reaction in tuberculosis, unspecified	Erythema nodos tb-unspec
KO	Erythema nodosum with hypersensitivity reaction in tuberculosis, bacteriological or histological examination not done	Erythem nodos tb-no exam
KO	Erythema nodosum with hypersensitivity reaction in tuberculosis, bacteriological or histological examination unknown (at present)	Erythem nod tb-exam unkn
KO	Erythema nodosum with hypersensitivity reaction in tuberculosis, tubercle bacilli found (in sputum) by microscopy	Erythem nod tb-micro dx
KO	Erythema nodosum with hypersensitivity reaction in tuberculosis, tubercle bacilli not found (in sputum) by microscopy, but found by bacterial culture	Erythem nodos tb-cult dx
KO	Erythema nodosum with hypersensitivity reaction in tuberculosis, tubercle bacilli not found by bacteriological examination, but tuberculosis confirmed histologically	Erythem nod tb-histo dx
KO	Erythema nodosum with hypersensitivity reaction in tuberculosis, tubercle bacilli not found by bacteriological or histological examination, but tuberculosis confirmed by other methods [inoculation of animals]	Erythem nod tb-oth test
KO	Tuberculosis of peripheral lymph nodes, unspecified	TB periph lymph-unspec
KO	Tuberculosis of peripheral lymph nodes, bacteriological or histological examination not done	TB periph lymph-no exam
KO	Tuberculosis of peripheral lymph nodes, bacteriological or histological examination unknown (at present)	TB periph lymph-exam unk
KO	Tuberculosis of peripheral lymph nodes, tubercle bacilli found (in sputum) by microscopy	TB periph lymph-micro dx
KO	Tuberculosis of peripheral lymph nodes, tubercle bacilli not found (in sputum) by microscopy, but found by bacterial culture	TB periph lymph-cult dx
KO	Tuberculosis of peripheral lymph nodes, tubercle bacilli not found by bacteriological examination, but tuberculosis confirmed histologically	TB periph lymph-histo dx
KO	Tuberculosis of peripheral lymph nodes, tubercle bacilli not found by bacteriological or histological examination, but tuberculosis confirmed by other methods [inoculation of animals]	TB periph lymph-oth test
KO	Tuberculosis of eye, unspecified	TB of eye-unspec
KO	Tuberculosis of eye, bacteriological or histological examination not done	TB of eye-no exam
KO	Tuberculosis of eye, bacteriological or histological examination unknown (at present)	TB of eye-exam unkn
KO	Tuberculosis of eye, tubercle bacilli found (in sputum) by microscopy	TB of eye-micro dx
KO	Tuberculosis of eye, tubercle bacilli not found (in sputum) by microscopy, but found by bacterial culture	TB of eye-cult dx
KO	Tuberculosis of eye, tubercle bacilli not found by bacteriological examination, but tuberculosis confirmed histologically	TB of eye-histo dx
KO	Tuberculosis of eye, tubercle bacilli not found by bacteriological or histological examination, but tuberculosis confirmed by other methods [inoculation of animals]	TB of eye-oth test
KO	Tuberculosis of ear, unspecified	TB of ear-unspec
KO	Tuberculosis of ear, bacteriological or histological examination not done	TB of ear-no exam
KO	Tuberculosis of ear, bacteriological or histological examination unknown (at present)	TB of ear-exam unkn
KO	Tuberculosis of ear, tubercle bacilli found (in sputum) by microscopy	TB of ear-micro dx
KO	Tuberculosis of ear, tubercle bacilli not found (in sputum) by microscopy, but found by bacterial culture	TB of ear-cult dx
KO	Tuberculosis of ear, tubercle bacilli not found by bacteriological examination, but tuberculosis confirmed histologically	TB of ear-histo dx
KO	Tuberculosis of ear, tubercle bacilli not found by bacteriological or histological examination, but tuberculosis confirmed by other methods [inoculation of animals]	TB of ear-oth test
KO	Tuberculosis of thyroid gland, unspecified	TB of thyroid-unspec
KO	Tuberculosis of thyroid gland, bacteriological or histological examination not done	TB of thyroid-no exam
KO	Tuberculosis of thyroid gland, bacteriological or histological examination unknown (at present)	TB of thyroid-exam unkn
KO	Tuberculosis of thyroid gland, tubercle bacilli found (in sputum) by microscopy	TB of thyroid-micro dx
KO	Tuberculosis of thyroid gland, tubercle bacilli not found (in sputum) by microscopy, but found by bacterial culture	TB of thyroid-cult dx
KO	Tuberculosis of thyroid gland, tubercle bacilli not found by bacteriological examination, but tuberculosis confirmed histologically	TB of thyroid-histo dx
KO	Tuberculosis of thyroid gland, tubercle bacilli not found by bacteriological or histological examination, but tuberculosis confirmed by other methods [inoculation of animals]	TB of thyroid-oth test
KO	Tuberculosis of adrenal glands, unspecified	TB of adrenal-unspec
KO	Tuberculosis of adrenal glands, bacteriological or histological examination not done	TB of adrenal-no exam
KO	Tuberculosis of adrenal glands, bacteriological or histological examination unknown (at present)	TB of adrenal-exam unkn
KO	Tuberculosis of adrenal glands, tubercle bacilli found (in sputum) by microscopy	TB of adrenal-micro dx
KO	Tuberculosis of adrenal glands, tubercle bacilli not found (in sputum) by microscopy, but found by bacterial culture	TB of adrenal-cult dx
KO	Tuberculosis of adrenal glands, tubercle bacilli not found by bacteriological examination, but tuberculosis confirmed histologically	TB of adrenal-histo dx
KO	Tuberculosis of adrenal glands, tubercle bacilli not found by bacteriological or histological examination, but tuberculosis confirmed by other methods [inoculation of animals]	TB of adrenal-oth test
KO	Tuberculosis of spleen, unspecified	TB of spleen-unspec
KO	Tuberculosis of spleen, bacteriological or histological examination not done	TB of spleen-no exam
KO	Tuberculosis of spleen, bacteriological or histological examination unknown (at present)	TB of spleen-exam unkn
KO	Tuberculosis of spleen, tubercle bacilli found (in sputum) by microscopy	TB of spleen-micro dx
KO	Tuberculosis of spleen, tubercle bacilli not found (in sputum) by microscopy, but found by bacterial culture	TB of spleen-cult dx
KO	Tuberculosis of spleen, tubercle bacilli not found by bacteriological examination, but tuberculosis confirmed histologically	TB of spleen-histo dx
KO	Tuberculosis of spleen, tubercle bacilli not found by bacteriological or histological examination, but tuberculosis confirmed by other methods [inoculation of animals]	TB of spleen-oth test
KO	Tuberculosis of esophagus, unspecified	TB esophagus-unspec
KO	Tuberculosis of esophagus, bacteriological or histological examination not done	TB esophagus-no exam
KO	Tuberculosis of esophagus, bacteriological or histological examination unknown (at present)	TB esophagus-exam unkn
KO	Tuberculosis of esophagus, tubercle bacilli found (in sputum) by microscopy	TB esophagus-micro dx
KO	Tuberculosis of esophagus, tubercle bacilli not found (in sputum) by microscopy, but found by bacterial culture	TB esophagus-cult dx
KO	Tuberculosis of esophagus, tubercle bacilli not found by bacteriological examination, but tuberculosis confirmed histologically	TB esophagus-histo dx
KO	Tuberculosis of esophagus, tubercle bacilli not found by bacteriological or histological examination, but tuberculosis confirmed by other methods [inoculation of animals]	TB esophagus-oth test
KO	Tuberculosis of other specified organs, unspecified	TB of organ NEC-unspec
KO	Tuberculosis of other specified organs, bacteriological or histological examination not done	TB of organ NEC-no exam
KO	Tuberculosis of other specified organs, bacteriological or histological examination unknown (at present)	TB organ NEC-exam unkn
KO	Tuberculosis of other specified organs, tubercle bacilli found (in sputum) by microscopy	TB of organ NEC-micro dx
KO	Tuberculosis of other specified organs, tubercle bacilli not found (in sputum) by microscopy, but found by bacterial culture	TB of organ NEC-cult dx
KO	Tuberculosis of other specified organs, tubercle bacilli not found by bacteriological examination, but tuberculosis confirmed histologically	TB of organ NEC-histo dx
KO	Tuberculosis of other specified organs, tubercle bacilli not found by bacteriological or histological examination, but tuberculosis confirmed by other methods [inoculation of animals]	TB of organ NEC-oth test
KO	Acute miliary tuberculosis, bacteriological or histological examination not done	Acute miliary tb-no exam
KO	Acute miliary tuberculosis, bacteriological or histological examination unknown (at present)	Ac miliary tb-exam unkn
KO	Acute miliary tuberculosis, tubercle bacilli found (in sputum) by microscopy	Ac miliary tb-micro dx
KO	Acute miliary tuberculosis, tubercle bacilli not found (in sputum) by microscopy, but found by bacterial culture	Acute miliary tb-cult dx
KO	Acute miliary tuberculosis, tubercle bacilli not found by bacteriological examination, but tuberculosis confirmed histologically	Ac miliary tb-histo dx
KO	Acute miliary tuberculosis, tubercle bacilli not found by bacteriological or histological examination, but tuberculosis confirmed by other methods [inoculation of animals]	Ac miliary tb-oth test
KO	Other specified miliary tuberculosis, unspecified	Miliary TB NEC-unspec
KO	Other specified miliary tuberculosis, bacteriological or histological examination not done	Miliary TB NEC-no exam
KO	Other specified miliary tuberculosis, bacteriological or histological examination unknown (at present)	Miliary TB NEC-exam unkn
KO	Other specified miliary tuberculosis, tubercle bacilli found (in sputum) by microscopy	Miliary TB NEC-micro dx
KO	Other specified miliary tuberculosis, tubercle bacilli not found (in sputum) by microscopy, but found by bacterial culture	Miliary TB NEC-cult dx
KO	Other specified miliary tuberculosis, tubercle bacilli not found by bacteriological examination, but tuberculosis confirmed histologically	Miliary TB NEC-histo dx
KO	Other specified miliary tuberculosis, tubercle bacilli not found by bacteriological or histological examination, but tuberculosis confirmed by other methods [inoculation of animals]	Miliary TB NEC-oth test
KO	Miliary tuberculosis, unspecified, unspecified	Miliary TB NOS-unspec
KO	Miliary tuberculosis, unspecified, bacteriological or histological examination not done	Miliary TB NOS-no exam
KO	Miliary tuberculosis, unspecified, bacteriological or histological examination unknown (at present)	Miliary TB NOS-exam unkn
KO	Miliary tuberculosis, unspecified, tubercle bacilli found (in sputum) by microscopy	Miliary TB NOS-micro dx
KO	Miliary tuberculosis, unspecified, tubercle bacilli not found (in sputum) by microscopy, but found by bacterial culture	Miliary TB NOS-cult dx
KO	Miliary tuberculosis, unspecified, tubercle bacilli not found by bacteriological examination, but tuberculosis confirmed histologically	Miliary TB NOS-histo dx
KO	Miliary tuberculosis, unspecified, tubercle bacilli not found by bacteriological or histological examination, but tuberculosis confirmed by other methods [inoculation of animals]	Miliary TB NOS-oth test
KO	Cellulocutaneous plague	Cellulocutaneous plague
KO	Septicemic plague	Septicemic plague
KO	Primary pneumonic plague	Primary pneumonic plague
KO	Secondary pneumonic plague	Secondary pneumon plague
KO	Pneumonic plague, unspecified	Pneumonic plague NOS
KO	Other specified types of plague	Other types of plague
KO	Plague, unspecified	Plague NOS
KO	Enteric tularemia	Enteric tularemia
KO	Pulmonary tularemia	Pulmonary tularemia
KO	Oculoglandular tularemia	Oculoglandular tularemia
KO	Other specified tularemia	Tularemia NEC
KO	Unspecified tularemia	Tularemia NOS
KO	Pulmonary anthrax	Pulmonary anthrax
KO	Gastrointestinal anthrax	Gastrointestinal anthrax
KO	Anthrax septicemia	Anthrax septicemia
KO	Other specified manifestations of anthrax	Other anthrax manifest
KO	Anthrax, unspecified	Anthrax NOS
KO	Brucella abortus	Brucella abortus
KO	Brucella suis	Brucella suis
KO	Brucella canis	Brucella canis
KO	Other brucellosis	Brucellosis NEC
KO	Brucellosis, unspecified	Brucellosis NOS
KO	Streptobacillary fever	Streptobacillary fever
KO	Unspecified rat-bite fever	Rat-bite fever NOS
KO	Erysipelothrix infection	Erysipelothrix infection
KO	Pasteurellosis	Pasteurellosis
KO	Other specified zoonotic bacterial diseases	Zoonotic bact dis NEC
KO	Unspecified zoonotic bacterial disease	Zoonotic bact dis NOS
KO	Tuberculoid leprosy [type T]	Tuberculoid leprosy
KO	Indeterminate leprosy [group I]	Indeterminate leprosy
KO	Borderline leprosy [group B]	Borderline leprosy
KO	Other specified leprosy	Leprosy NEC
KO	Leprosy, unspecified	Leprosy NOS
KO	Cutaneous diseases due to other mycobacteria	Cutaneous mycobacteria
KO	Disseminated due to other mycobacteria	DMAC bacteremia
KO	Other specified mycobacterial diseases	Mycobacterial dis NEC
KO	Unspecified diseases due to mycobacteria	Mycobacterial dis NOS
KO	Nasopharyngeal diphtheria	Nasopharynx diphtheria
KO	Anterior nasal diphtheria	Ant nasal diphtheria
KO	Laryngeal diphtheria	Laryngeal diphtheria
KO	Conjunctival diphtheria	Conjunctival diphtheria
KO	Diphtheritic myocarditis	Diphtheritic myocarditis
KO	Diphtheritic peritonitis	Diphtheritic peritonitis
KO	Diphtheritic cystitis	Diphtheritic cystitis
KO	Cutaneous diphtheria	Cutaneous diphtheria
KO	Other specified diphtheria	Diphtheria NEC
KO	Diphtheria, unspecified	Diphtheria NOS
KO	Whooping cough due to bordetella parapertussis [B. parapertussis]	Bordetella parapertussis
KO	Whooping cough due to other specified organism	Whooping cough NEC
KO	Whooping cough, unspecified organism	Whooping cough NOS
KO	Scarlet fever	Scarlet fever
KO	Meningococcal encephalitis	Meningococc encephalitis
KO	Meningococcemia	Meningococcemia
KO	Waterhouse-Friderichsen syndrome, meningococcal	Meningococc adrenal synd
KO	Meningococcal carditis, unspecified	Meningococc carditis NOS
KO	Meningococcal pericarditis	Meningococc pericarditis
KO	Meningococcal endocarditis	Meningococc endocarditis
KO	Meningococcal myocarditis	Meningococc myocarditis
KO	Meningococcal optic neuritis	Meningococc optic neurit
KO	Meningococcal arthropathy	Meningococc arthropathy
KO	Other specified meningococcal infections	Meningococcal infect NEC
KO	Meningococcal infection, unspecified	Meningococcal infect NOS
KO	Staphylococcal septicemia, unspecified	Staphylcocc septicem NOS
KO	Methicillin susceptible Staphylococcus aureus septicemia	Meth susc Staph aur sept
KO	Methicillin resistant Staphylococcus aureus septicemia	MRSA septicemia
KO	Other staphylococcal septicemia	Staphylcocc septicem NEC
KO	Pneumococcal septicemia [Streptococcus pneumoniae septicemia]	Pneumococcal septicemia
KO	Septicemia due to anaerobes	Anaerobic septicemia
KO	Septicemia due to gram-negative organism, unspecified	Gram-neg septicemia NOS
KO	Septicemia due to hemophilus influenzae [H. influenzae]	H. influenae septicemia
KO	Septicemia due to escherichia coli [E. coli]	E coli septicemia
KO	Septicemia due to pseudomonas	Pseudomonas septicemia
KO	Septicemia due to serratia	Serratia septicemia
KO	Other septicemia due to gram-negative organisms	Gram-neg septicemia NEC
KO	Other specified septicemias	Septicemia NEC
KO	Unspecified septicemia	Septicemia NOS
KO	Pulmonary actinomycotic infection	Pulmonary actinomycosis
KO	Abdominal actinomycotic infection	Abdominal actinomycosis
KO	Cervicofacial actinomycotic infection	Cervicofac actinomycosis
KO	Madura foot	Madura foot
KO	Actinomycotic infection of other specified sites	Actinomycosis NEC
KO	Actinomycotic infection of unspecified site	Actinomycosis NOS
KO	Rhinoscleroma	Rhinoscleroma
KO	Whipple's disease	Whipple's disease
KO	Necrobacillosis	Necrobacillosis
KO	Infant botulism	Infant botulism
KO	Wound botulism	Wound botulism
KO	Tropical pyomyositis	Tropical pyomyositis
KO	Toxic shock syndrome	Toxic shock syndrome
KO	Other specified bacterial diseases	Bacterial diseases NEC
KO	Streptococcus infection in conditions classified elsewhere and of unspecified site, streptococcus, group A	Streptococcus group a
KO	Streptococcus infection in conditions classified elsewhere and of unspecified site, streptococcus, group B	Streptococcus group b
KO	Streptococcus infection in conditions classified elsewhere and of unspecified site, streptococcus, group C	Streptococcus group c
KO	Streptococcus infection in conditions classified elsewhere and of unspecified site, streptococcus, group D [Enterococcus]	Enterococcus group d
KO	Streptococcus infection in conditions classified elsewhere and of unspecified site, streptococcus, group G	Streptococcus group g
KO	Streptococcus infection in conditions classified elsewhere and of unspecified site, other streptococcus	Other streptococcus
KO	Staphylococcus infection in conditions classified elsewhere and of unspecified site, staphylococcus, unspecified	Staphylococcus unspcfied
KO	Methicillin susceptible Staphylococcus aureus in conditions classified elsewhere and of unspecified site	Mth sus Stph aur els/NOS
KO	Methicillin resistant Staphylococcus aureus in conditions classified elsewhere and of unspecified site	MRSA elsewhere/NOS
KO	Staphylococcus infection in conditions classified elsewhere and of unspecified site, other staphylococcus	Other staphylococcus
KO	Pneumococcus infection in conditions classified elsewhere and of unspecified site	Pneumococcus infect NOS
KO	Friedländer's bacillus infection in conditions classified elsewhere and of unspecified site	Klebsiella pneumoniae
KO	Shiga toxin-producing Escherichia coli [E. coli] (STEC) O157	Shiga txn-produce E.coli
KO	Other specified Shiga toxin-producing Escherichia coli [E. coli] (STEC)	Shga txn prod E.coli NEC
KO	Shiga toxin-producing Escherichia coli [E. coli] (STEC), unspecified	Shga txn prod E.coli NOS
KO	Other and unspecified Escherichia coli [E. coli]	E.coli infection NEC/NOS
KO	Hemophilus influenzae [H. influenzae] infection in conditions classified elsewhere and of unspecified site	H. influenzae infect NOS
KO	Proteus (mirabilis) (morganii) infection in conditions classified elsewhere and of unspecified site	Proteus infection NOS
KO	Pseudomonas infection in conditions classified elsewhere and of unspecified site	Pseudomonas infect NOS
KO	Other specified bacterial infections in conditions classified elsewhere and of unspecified site, mycoplasma	Mycoplasma
KO	Bacteroides fragilis	Bacteroides fragilis
KO	Other specified bacterial infections in conditions classified elsewhere and of unspecified site, Clostridium perfringens	Clostridium perfringens
KO	Other specified bacterial infections in conditions classified elsewhere and of unspecified site, other anaerobes	Other anaerobes
KO	Other specified bacterial infections in conditions classified elsewhere and of unspecified site, other gram-negative organisms	Oth gram negatv bacteria
KO	Helicobacter pylori [H. pylori]	Helicobacter pylori
KO	Other specified bacterial infections in conditions classified elsewhere and of unspecified site, other specified bacteria	Oth specf bacteria
KO	Bacterial infection, unspecified, in conditions classified elsewhere and of unspecified site	Bacterial infection NOS
KO	Acute paralytic poliomyelitis specified as bulbar, poliovirus type I	Ac bulbar polio-type 1
KO	Acute paralytic poliomyelitis specified as bulbar, poliovirus type II	Ac bulbar polio-type 2
KO	Acute paralytic poliomyelitis specified as bulbar, poliovirus type III	Ac bulbar polio-type 3
KO	Acute poliomyelitis with other paralysis, poliovirus, unspecified type	Paral polio NEC-type NOS
KO	Acute poliomyelitis with other paralysis, poliovirus type I	Paral polio NEC-type 1
KO	Acute poliomyelitis with other paralysis, poliovirus type II	Paral polio NEC-type 2
KO	Acute poliomyelitis with other paralysis, poliovirus type III	Paral polio NEC-type 3
KO	Acute nonparalytic poliomyelitis, poliovirus, unspecified type	Nonparaly polio-type NOS
KO	Acute nonparalytic poliomyelitis, poliovirus type I	Nonparalyt polio-type 1
KO	Acute nonparalytic poliomyelitis, poliovirus type II	Nonparalyt polio-type 2
KO	Acute nonparalytic poliomyelitis, poliovirus type III	Nonparalyt polio-type 3
KO	Acute poliomyelitis, unspecified, poliovirus, unspecified type	Ac polio NOS-type NOS
KO	Acute poliomyelitis, unspecified, poliovirus type I	Ac polio NOS-type 1
KO	Acute poliomyelitis, unspecified, poliovirus type II	Ac polio NOS-type 2
KO	Acute poliomyelitis, unspecified, poliovirus type III	Ac polio NOS-type 3
KO	Variant Creutzfeldt-Jakob disease	Varnt Creutzfeldt-Jakob
KO	Other and unspecified Creutzfeldt-Jakob disease	Creutzfldt-Jakob NEC/NOS
KO	Subacute sclerosing panencephalitis	Subac scleros panenceph
KO	Progressive multifocal leukoencephalopathy	Prog multifoc leukoencep
KO	Gerstmann-Sträussler-Scheinker syndrome	Gerstmn-Straus-Schnk syn
KO	Fatal familial insomnia	Fatal familial insomnia
KO	Other and unspecified prion disease of central nervous system	Prion dis of CNS NEC/NOS
KO	Other specified slow virus infection of central nervous system	Cns slow virus infec NEC
KO	Unspecified slow virus infection of central nervous system	Cns slow virus infec NOS
KO	Meningitis due to echo virus	Echo virus meningitis
KO	Other specified viral meningitis	Viral meningitis NEC
KO	Unspecified viral meningitis	Viral meningitis NOS
KO	Meningitis due to adenovirus	Adenoviral meningitis
KO	Other specified non-arthropod-borne viral diseases of central nervous system	Viral encephalitis NEC
KO	Unspecified non-arthropod-borne viral diseases of central nervous system	Viral encephalitis NOS
KO	Alastrim	Alastrim
KO	Modified smallpox	Modified smallpox
KO	Smallpox, unspecified	Smallpox NOS
KO	Cowpox	Cowpox
KO	Vaccinia not from vaccination	Vaccinia n/f vaccination
KO	Pseudocowpox	Pseudocowpox
KO	Contagious pustular dermatitis	Contagious pustular derm
KO	Paravaccinia, unspecified	Paravaccinia NOS
KO	Varicella (hemorrhagic) pneumonitis	Varicella pneumonitis
KO	Postvaricella myelitis	Postvaricella myelitis
KO	Chickenpox with other specified complications	Varicella complicat NEC
KO	Chickenpox with unspecified complication	Varicella complicat NOS
KO	Varicella without mention of complication	Varicella uncomplicated
KO	Herpes zoster with unspecified nervous system complication	H zoster nerv syst NOS
KO	Geniculate herpes zoster	Geniculate herpes zoster
KO	Postherpetic trigeminal neuralgia	Postherpes trigem neural
KO	Postherpetic polyneuropathy	Postherpes polyneuropath
KO	Herpes zoster myelitis	Herpes zoster myelitis
KO	Herpes zoster with other nervous system complications	H zoster nerv syst NEC
KO	Herpes zoster dermatitis of eyelid	Herpes zoster of eyelid
KO	Herpes zoster keratoconjunctivitis	H zoster keratoconjunct
KO	Herpes zoster iridocyclitis	H zoster iridocyclitis
KO	Herpes zoster with other ophthalmic complications	Herpes zoster of eye NEC
KO	Otitis externa due to herpes zoster	H zoster otitis externa
KO	Herpes zoster with other specified complications	H zoster complicated NEC
KO	Herpes zoster with unspecified complication	H zoster complicated NOS
KO	Herpes zoster without mention of complication	Herpes zoster NOS
KO	Genital herpes, unspecified	Genital herpes NOS
KO	Herpetic vulvovaginitis	Herpetic vulvovaginitis
KO	Herpetic ulceration of vulva	Herpetic ulcer of vulva
KO	Herpetic infection of penis	Herpetic infect of penis
KO	Other genital herpes	Genital herpes NEC
KO	Herpetic gingivostomatitis	Herpetic gingivostomat
KO	Herpetic meningoencephalitis	Herpetic encephalitis
KO	Herpes simplex with unspecified ophthalmic complication	Herpes simplex eye NOS
KO	Herpes simplex dermatitis of eyelid	Herpes simplex of eyelid
KO	Dendritic keratitis	Dendritic keratitis
KO	Herpes simplex disciform keratitis	H simplex keratitis
KO	Herpes simplex iridocyclitis	H simplex iridocyclitis
KO	Herpes simplex with other ophthalmic complications	Herpes simplex eye NEC
KO	Herpetic septicemia	Herpetic septicemia
KO	Herpetic whitlow	Herpetic whitlow
KO	Visceral herpes simplex	Visceral herpes simplex
KO	Herpes simplex meningitis	H simplex meningitis
KO	Herpes simplex otitis externa	H simplex otitis externa
KO	Herpes simplex myelitis	Herpes simplex myelitis
KO	Herpes simplex with other specified complications	H simplex complicat NEC
KO	Herpes simplex with unspecified complication	H simplex complicat NOS
KO	Herpes simplex without mention of complication	Herpes simplex NOS
KO	Postmeasles pneumonia	Postmeasles pneumonia
KO	Postmeasles otitis media	Postmeasles otitis media
KO	Measles keratoconjunctivitis	Measles keratitis
KO	Measles with other specified complications	Measles complication NEC
KO	Measles with unspecified complication	Measles complication NOS
KO	Measles without mention of complication	Measles uncomplicated
KO	Encephalomyelitis due to rubella	Rubella encephalitis
KO	Rubella with other neurological complications	Rubella nerve compl NEC
KO	Arthritis due to rubella	Arthritis due to rubella
KO	Rubella with other specified complications	Rubella complication NEC
KO	Rubella with unspecified complications	Rubella complication NOS
KO	Rubella without mention of complication	Rubella uncomplicated
KO	Other specified viral exanthemata	Viral exanthemata NEC
KO	Viral exanthem, unspecified	Viral exanthemata NOS
KO	Roseola infantum, unspecified	Roseola infantum NOS
KO	Roseola infantum due to human herpesvirus 6	Roseola infant d/t HHV-6
KO	Roseola infantum due to human herpesvirus 7	Roseola infant d/t HHV-7
KO	Human herpesvirus 6 encephalitis	Human herpesvir 6 enceph
KO	Other human herpesvirus encephalitis	Human herpesvr encph NEC
KO	Human herpesvirus 6 infection	Human herpesvirus 6 infc
KO	Human herpesvirus 7 infection	Human herpesvirus 7 infc
KO	Other human herpesvirus infection	Human herpesvirs inf NEC
KO	Monkeypox	Monkeypox
KO	Other orthopoxvirus infections	Orthopoxvirus infect NEC
KO	Parapoxvirus infection, unspecified	Parapoxvirus infectn NOS
KO	Bovine stomatitis	Bovine stomatitis
KO	Sealpox	Sealpox
KO	Other parapoxvirus infections	Parapoxvirus infectn NEC
KO	Yatapoxvirus infection, unspecified	Yatapoxvirus infectn NOS
KO	Tanapox	Tanapox
KO	Yaba monkey tumor virus	Yaba monkey tumor virus
KO	Other poxvirus infections	Poxvirus infections NEC
KO	Poxvirus infections, unspecified	Poxvirus infection NOS
KO	Urban yellow fever	Urban yellow fever
KO	Yellow fever, unspecified	Yellow fever NOS
KO	Western equine encephalitis	West equine encephalitis
KO	Eastern equine encephalitis	East equine encephalitis
KO	St. Louis encephalitis	St Louis encephalitis
KO	Australian encephalitis	Australian encephalitis
KO	California virus encephalitis	California encephalitis
KO	Other specified mosquito-borne viral encephalitis	Mosquit-borne enceph NEC
KO	Mosquito-borne viral encephalitis, unspecified	Mosquit-borne enceph NOS
KO	Louping ill	Louping ill
KO	Central european encephalitis	Cent Europe encephalitis
KO	Other specified tick-borne viral encephalitis	Tick-borne enceph NEC
KO	Tick-borne viral encephalitis, unspecified	Tick-borne enceph NOS
KO	Omsk hemorrhagic fever	Omsk hemorrhagic fever
KO	Kyasanur forest disease	Kyasanur forest disease
KO	Other tick-borne hemorrhagic fever	Tick-borne hem fever NEC
KO	Mosquito-borne hemorrhagic fever	Mosquito-borne hem fever
KO	Other specified arthropod-borne hemorrhagic fever	Arthropod hem fever NEC
KO	Arthropod-borne hemorrhagic fever, unspecified	Arthropod hem fever NOS
KO	Tick-borne fever	Tick-borne fever
KO	Venezuelan equine fever	Venezuelan equine fever
KO	Other mosquito-borne fever	Mosquito-borne fever NEC
KO	West Nile Fever, unspecified	West Nile Fever NOS
KO	West Nile Fever with encephalitis	West Nile Fever w/enceph
KO	West Nile Fever with other neurologic manifestation	West Nile neuro man NEC
KO	West Nile Fever with other complications	West Nile w complic NEC
KO	Other specified arthropod-borne viral diseases	Arthropod virus NEC
KO	Arthropod-borne viral disease, unspecified	Arthropod virus NOS
KO	Viral hepatitis A without mention of hepatic coma	Hepatitis A w/o coma
KO	Viral hepatitis B with hepatic coma, acute or unspecified, without mention of hepatitis delta	Hpt B acte coma wo dlta
KO	Viral hepatitis B with hepatic coma, acute or unspecified, with hepatitis delta	Hpt B acte coma w dlta
KO	Chronic viral hepatitis B with hepatic coma without hepatitis delta	Hpt B chrn coma wo dlta
KO	Chronic viral hepatitis B with hepatic coma with hepatitis delta	Hpt B chrn coma w dlta
KO	Viral hepatitis B without mention of hepatic coma, acute or unspecified, without mention of hepatitis delta	Hpt B acte wo cm wo dlta
KO	Viral hepatitis B without mention of hepatic coma, acute or unspecified, with hepatitis delta	Hpt B acte wo cm w dlta
KO	Chronic viral hepatitis B without mention of hepatic coma without mention of hepatitis delta	Hpt B chrn wo cm wo dlta
KO	Chronic viral hepatitis B without mention of hepatic coma with hepatitis delta	Hpt B chrn wo cm w dlta
KO	Acute hepatitis C with hepatic coma	Hpt C acute w hepat Coma
KO	Hepatitis delta without mention of active hepatitis B disease with hepatic coma	Hpt dlt wo b w hpt coma
KO	Hepatitis E with hepatic coma	Hpt E w hepat Coma
KO	Chronic hepatitis C with hepatic coma	Chrnc hpt C w hepat Coma
KO	Other specified viral hepatitis with hepatic coma	Oth vrl hepat w hpt coma
KO	Acute hepatitis C without mention of hepatic coma	Hpt C acute wo hpat coma
KO	Hepatitis delta without mention of active hepatitis B disease or hepatic coma	Hpt dlt wo b wo hpt coma
KO	Hepatitis E without mention of hepatic coma	Hpt E wo hepat Coma
KO	Chronic hepatitis C without mention of hepatic coma	Chrnc hpt C wo hpat coma
KO	Other specified viral hepatitis without mention of hepatic coma	Oth vrl hpat wo hpt coma
KO	Unspecified viral hepatitis with hepatic coma	Viral hepat NOS w coma
KO	Unspecified viral hepatitis C without hepatic coma	Hpt C w/o hepat coma NOS
KO	Unspecified viral hepatitis C with hepatic coma	Hpt C w hepatic coma NOS
KO	Unspecified viral hepatitis without mention of hepatic coma	Viral hepat NOS w/o coma
KO	Mumps meningitis	Mumps meningitis
KO	Mumps encephalitis	Mumps encephalitis
KO	Mumps pancreatitis	Mumps pancreatitis
KO	Mumps hepatitis	Mumps hepatitis
KO	Mumps polyneuropathy	Mumps polyneuropathy
KO	Other mumps with other specified complications	Mumps complication NEC
KO	Mumps with unspecified complication	Mumps complication NOS
KO	Mumps without mention of complication	Mumps uncomplicated
KO	Ornithosis with other specified complications	Ornithosis complicat NEC
KO	Ornithosis with unspecified complication	Ornithosis complicat NOS
KO	Ornithosis, unspecified	Ornithosis NOS
KO	Epidemic pleurodynia	Epidemic pleurodynia
KO	Coxsackie carditis, unspecified	Coxsackie carditis NOS
KO	Coxsackie pericarditis	Coxsackie pericarditis
KO	Coxsackie endocarditis	Coxsackie endocarditis
KO	Coxsackie myocarditis	Coxsackie myocarditis
KO	Hand, foot, and mouth disease	Hand, foot & mouth dis
KO	Other specified diseases due to Coxsackie virus	Coxsackie virus NEC
KO	Trachoma, active stage	Trachoma, active stage
KO	Trachoma, unspecified	Trachoma NOS
KO	Epidemic keratoconjunctivitis	Epidem keratoconjunctiv
KO	Pharyngoconjunctival fever	Pharyngoconjunct fever
KO	Other adenoviral conjunctivitis	Adenoviral conjunct NEC
KO	Epidemic hemorrhagic conjunctivitis	Epidem hem conjunctivit
KO	Other viral conjunctivitis	Viral conjunctivitis NEC
KO	Unspecified diseases of conjunctiva due to chlamydiae	Unsp ds conjuc chlamydia
KO	Unspecified diseases of conjunctiva due to viruses	Unsp ds conjuc viruses
KO	Viral warts, unspecified	Viral warts NOS
KO	Condyloma acuminatum	Condyloma acuminatum
KO	Plantar wart	Plantar wart
KO	Other specified viral warts	Oth specfd viral warts
KO	Sweating fever	Sweating fever
KO	Cat-scratch disease	Cat-scratch disease
KO	Foot and mouth disease	Foot & mouth disease
KO	Cytomegaloviral disease	Cytomegaloviral disease
KO	Hemorrhagic nephrosonephritis	Hem nephrosonephritis
KO	Arenaviral hemorrhagic fever	Arenaviral hem fever
KO	Epidemic vertigo	Epidemic vertigo
KO	Epidemic vomiting syndrome	Epidemic vomiting synd
KO	Other specified diseases due to chlamydiae	Oth spec dis chlamydiae
KO	Other specified diseases due to viruses	Oth spec dis viruses
KO	Echo virus infection in conditions classified elsewhere and of unspecified site	Echo virus infect NOS
KO	Coxsackie virus infection in conditions classified elsewhere and of unspecified site	Coxsackie virus inf NOS
KO	Rhinovirus infection in conditions classified elsewhere and of unspecified site	Rhinovirus infect NOS
KO	Human papillomavirus in conditions classified elsewhere and of unspecified site	Human papillomavirus
KO	Retrovirus, unspecified	Retrovirus, unspecified
KO	Human T-cell lymphotrophic virus, type I [HTLV-I]	Htlv-1 infection oth dis
KO	Human T-cell lymphotrophic virus, type II [HTLV-II]	Htlv-ii infectn oth dis
KO	Human immunodeficiency virus, type 2 [HIV-2]	Hiv-2 infection oth dis
KO	Other specified retrovirus	Oth specfied retrovirus
KO	Respiratory syncytial virus (RSV)	Resprtry syncytial virus
KO	Hantavirus infection	Hantavirus infection
KO	SARS-associated coronavirus	SARS assoc coronavirus
KO	Parvovirus B19	Parvovirus B19
KO	Other specified chlamydial infection	Oth spcf chlamydial infc
KO	Other specified viral infection	Oth specf viral infectn
KO	Unspecified chlamydial infection	Chlamydial infection NOS
KO	Unspecified viral infection	Viral infection NOS
KO	Brill's disease	Brill's disease
KO	Scrub typhus	Scrub typhus
KO	Typhus, unspecified	Typhus NOS
KO	Boutonneuse fever	Boutonneuse fever
KO	North Asian tick fever	North asian tick fever
KO	Queensland tick typhus	Queensland tick typhus
KO	Ehrlichiosis, unspecified	Ehrlichiosis NOS
KO	Ehrlichiosis chafeensis [E. chafeensis]	Ehrlichiosis chafeensis
KO	Other ehrlichiosis	Ehrlichiosis NEC
KO	Other specified tick-borne rickettsioses	Tick-borne ricketts NEC
KO	Tick-borne rickettsiosis, unspecified	Tick-borne ricketts NOS
KO	Trench fever	Trench fever
KO	Rickettsialpox	Rickettsialpox
KO	Other specified rickettsioses	Rickettsioses NEC
KO	Rickettsiosis, unspecified	Rickettsiosis NOS
KO	Vivax malaria [benign tertian]	Vivax malaria
KO	Quartan malaria	Quartan malaria
KO	Ovale malaria	Ovale malaria
KO	Other malaria	Malaria NEC
KO	Mixed malaria	Mixed malaria
KO	Malaria, unspecified	Malaria NOS
KO	Induced malaria	Induced malaria
KO	Blackwater fever	Blackwater fever
KO	Other pernicious complications of malaria	Malaria complicated NEC
KO	Cutaneous leishmaniasis, urban	Cutan leishmanias urban
KO	Cutaneous leishmaniasis, Asian desert	Cutan leishmanias asian
KO	Cutaneous leishmaniasis, Ethiopian	Cutan leishmanias ethiop
KO	Cutaneous leishmaniasis, American	Cutan leishmanias amer
KO	Mucocutaneous leishmaniasis, (American)	Mucocutan leishmaniasis
KO	Leishmaniasis, unspecified	Leishmaniasis NOS
KO	Chagas' disease with other organ involvement	Chagas dis of oth organ
KO	Chagas' disease without mention of organ involvement	Chagas disease NOS
KO	Gambian trypanosomiasis	Gambian trypanosomiasis
KO	Rhodesian trypanosomiasis	Rhodesian trypanosomias
KO	African trypanosomiasis, unspecified	African trypanosoma NOS
KO	Trypanosomiasis, unspecified	Trypanosomiasis NOS
KO	Relapsing fever, tick-borne	Tick-borne relaps fever
KO	Relapsing fever, unspecified	Relapsing fever NOS
KO	Lyme Disease	Lyme disease
KO	Babesiosis	Babesiosis
KO	Other specified arthropod-borne diseases, other	Oth arthropod-borne dis
KO	Arthropod-borne disease, unspecified	Arthropod-borne dis NOS
KO	Early congenital syphilis, latent	Early congen syph latent
KO	Early congenital syphilis, unspecified	Early congen syph NOS
KO	Syphilitic interstitial keratitis	Syphilitic keratitis
KO	Juvenile neurosyphilis, unspecified	Juvenile neurosyph NOS
KO	Congenital syphilitic encephalitis	Congen syph encephalitis
KO	Congenital syphilitic meningitis	Congen syph meningitis
KO	Other juvenile neurosyphilis	Juvenile neurosyph NEC
KO	Other late congenital syphilis, symptomatic	Late congen syph symptom
KO	Late congenital syphilis, latent	Late congen syph latent
KO	Late congenital syphilis, unspecified	Late congen syph NOS
KO	Congenital syphilis, unspecified	Congenital syphilis NOS
KO	Primary anal syphilis	Primary anal syphilis
KO	Other primary syphilis	Primary syphilis NEC
KO	Secondary syphilis of skin or mucous membranes	Secondary syph skin
KO	Adenopathy due to secondary syphilis	Syphilitic adenopathy
KO	Syphilitic uveitis, unspecified	Syphilitic uveitis NOS
KO	Syphilitic chorioretinitis (secondary)	Syphilit chorioretinitis
KO	Syphilitic iridocyclitis (secondary)	Syphilitic iridocyclitis
KO	Secondary syphilitic periostitis	Syphilitic periostitis
KO	Secondary syphilitic hepatitis	Syphilitic hepatitis
KO	Secondary syphilis of other viscera	Second syph viscera NEC
KO	Secondary syphilis, relapse	Second syphilis relapse
KO	Acute syphilitic meningitis (secondary)	Acute syphil meningitis
KO	Syphilitic alopecia	Syphilitic alopecia
KO	Other forms of secondary syphilis	Secondary syphilis NEC
KO	Unspecified secondary syphilis	Secondary syphilis NOS
KO	Early syphilis, latent, unspecified	Early syphil latent NOS
KO	Syphilitic aortitis	Syphilitic aortitis
KO	Syphilitic endocarditis of valve, unspecified	Syphil endocarditis NOS
KO	Syphilitic endocarditis of mitral valve	Syphilitic mitral valve
KO	Syphilitic endocarditis of aortic valve	Syphilitic aortic valve
KO	Syphilitic endocarditis of tricuspid valve	Syphil tricuspid valve
KO	Syphilitic endocarditis of pulmonary valve	Syphil pulmonary valve
KO	Syphilitic pericarditis	Syphilitic pericarditis
KO	Syphilitic myocarditis	Syphilitic myocarditis
KO	Other specified cardiovascular syphilis	Cardiovascular syph NEC
KO	Cardiovascular syphilis, unspecified	Cardiovascular syph NOS
KO	General paresis	General paresis
KO	Syphilitic meningitis	Syphilitic meningitis
KO	Asymptomatic neurosyphilis	Asymptomat neurosyphilis
KO	Syphilitic encephalitis	Syphilitic encephalitis
KO	Syphilitic parkinsonism	Syphilitic parkinsonism
KO	Syphilitic disseminated retinochoroiditis	Syph dissem retinitis
KO	Syphilitic optic atrophy	Syphilitic optic atrophy
KO	Syphilitic retrobulbar neuritis	Syph retrobulb neuritis
KO	Syphilitic acoustic neuritis	Syphil acoustic neuritis
KO	Syphilitic ruptured cerebral aneurysm	Syph rupt cereb aneurysm
KO	Other specified neurosyphilis	Neurosyphilis NEC
KO	Neurosyphilis, unspecified	Neurosyphilis NOS
KO	Syphilis of lung	Syphilis of lung
KO	Syphilitic peritonitis	Syphilitic peritonitis
KO	Syphilis of liver	Syphilis of liver
KO	Syphilis of kidney	Syphilis of kidney
KO	Syphilis of bone	Syphilis of bone
KO	Syphilis of muscle	Syphilis of muscle
KO	Syphilis of synovium, tendon, and bursa	Syphilis of tendon/bursa
KO	Other specified forms of late symptomatic syphilis	Late sympt syphilis NEC
KO	Late symptomatic syphilis, unspecified	Late sympt syphilis NOS
KO	Latent syphilis, unspecified	Latent syphilis NOS
KO	Syphilis, unspecified	Syphilis NOS
KO	Gonococcal infection (acute) of upper genitourinary tract, site unspecified	Gc (acute) upper gu NOS
KO	Gonococcal cystitis (acute)	Gc cystitis (acute)
KO	Gonococcal prostatitis (acute)	Gc prostatitis (acute)
KO	Gonococcal epididymo-orchitis (acute)	Gc orchitis (acute)
KO	Gonococcal seminal vesiculitis (acute)	Gc sem vesiculit (acute)
KO	Gonococcal cervicitis (acute)	Gc cervicitis (acute)
KO	Gonococcal endometritis (acute)	Gc endometritis (acute)
KO	Gonococcal salpingitis, specified as acute	Acute gc salpingitis
KO	Other gonococcal infection (acute) of upper genitourinary tract	Gc (acute) upper gu NEC
KO	Gonococcal infection, chronic, of lower genitourinary tract	Chr gc infect lower gu
KO	Chronic gonococcal infection of upper genitourinary tract, site unspecified	Chr gc upper gu NOS
KO	Gonococcal cystitis, chronic	Gc cystitis, chronic
KO	Gonococcal prostatitis, chronic	Gc prostatitis, chronic
KO	Gonococcal epididymo-orchitis, chronic	Gc orchitis, chronic
KO	Gonococcal seminal vesiculitis, chronic	Gc sem vesiculitis, chr
KO	Gonococcal cervicitis, chronic	Gc cervicitis, chronic
KO	Gonococcal endometritis, chronic	Gc endometritis, chronic
KO	Gonococcal salpingitis (chronic)	Gc salpingitis (chronic)
KO	Other chronic gonococcal infection of upper genitourinary tract	Chr gc upper gu NEC
KO	Gonococcal conjunctivitis (neonatorum)	Gonococcal conjunctivit
KO	Gonococcal iridocyclitis	Gonococcal iridocyclitis
KO	Gonococcal endophthalmia	Gonococcal endophthalmia
KO	Gonococcal keratitis	Gonococcal keratitis
KO	Other gonococcal infection of eye	Gonococcal eye NEC
KO	Gonococcal arthritis	Gonococcal arthritis
KO	Gonococcal synovitis and tenosynovitis	Gonococcal synovitis
KO	Gonococcal bursitis	Gonococcal bursitis
KO	Gonococcal spondylitis	Gonococcal spondylitis
KO	Other gonococcal infection of joint	Gc infect joint NEC
KO	Gonococcal infection of pharynx	Gonococcal infec pharynx
KO	Gonococcal infection of anus and rectum	Gc infect anus & rectum
KO	Gonococcal keratosis (blennorrhagica)	Gonococcal keratosis
KO	Gonococcal meningitis	Gonococcal meningitis
KO	Gonococcal pericarditis	Gonococcal pericarditis
KO	Gonococcal endocarditis	Gonococcal endocarditis
KO	Other gonococcal heart disease	Gonococcal heart dis NEC
KO	Gonococcal peritonitis	Gonococcal peritonitis
KO	Gonococcal infection of other specified sites	Gonococcal inf site NEC
KO	Lymphogranuloma venereum	Lymphogranuloma venereum
KO	Granuloma inguinale	Granuloma inguinale
KO	Reiter's disease	Reiter's disease
KO	Other nongonococcal urethritis, unspecified	Unspcf nongnccl urethrts
KO	Other nongonococcal urethritis, chlamydia trachomatis	Chlmyd trachomatis ureth
KO	Other nongonococcal urethritis, other specified organism	Nongc urth oth spf orgsm
KO	Other venereal diseases due to chlamydia trachomatis, unspecified site	Oth VD chlm trch unsp st
KO	Other venereal diseases due to chlamydia trachomatis, pharynx	Oth VD chlm trch pharynx
KO	Other venereal diseases due to chlamydia trachomatis, anus and rectum	Oth VD chlm trch ans rct
KO	Other venereal diseases due to chlamydia trachomatis, lower genitourinary sites	Oth VD chlm trch lowr gu
KO	Other venereal diseases due to chlamydia trachomatis, other genitourinary sites	Oth VD chlm trch oth gu
KO	Other venereal diseases due to chlamydia trachomatis, unspecified genitourinary site	Ot VD chlm trch unspf gu
KO	Other venereal diseases due to chlamydia trachomatis, peritoneum	Ot VD chlm trch prtoneum
KO	Other venereal diseases due to chlamydia trachomatis, other specified site	Oth VD chlm trch spcf st
KO	Other specified venereal diseases	Venereal disease NEC
KO	Venereal disease, unspecified	Venereal disease NOS
KO	Leptospiral meningitis (aseptic)	Leptospiral meningitis
KO	Other specified leptospiral infections	Leptospiral infect NEC
KO	Leptospirosis, unspecified	Leptospirosis NOS
KO	Multiple papillomata due to yaws and wet crab yaws	Multiple papillomata
KO	Other early skin lesions of yaws	Early skin yaws NEC
KO	Hyperkeratosis due to yaws	Hyperkeratosis of yaws
KO	Gummata and ulcers due to yaws	Gummata and ulcers, yaws
KO	Gangosa	Gangosa
KO	Bone and joint lesions due to yaws	Yaws of bone & joint
KO	Other manifestations of yaws	Yaws manifestations NEC
KO	Latent yaws	Latent yaws
KO	Yaws, unspecified	Yaws NOS
KO	Intermediate lesions of pinta	Pinta intermed lesions
KO	Late lesions of pinta	Pinta late lesions
KO	Mixed lesions of pinta	Pinta mixed lesions
KO	Pinta, unspecified	Pinta NOS
KO	Other specified spirochetal infections	Spirochetal infect NEC
KO	Spirochetal infection, unspecified	Spirochetal infect NOS
KO	Dermatophytosis of nail	Dermatophytosis of nail
KO	Dermatophytosis of hand	Dermatophytosis of hand
KO	Dermatophytosis of groin and perianal area	Dermatophytosis of groin
KO	Dermatophytosis of foot	Dermatophytosis of foot
KO	Dermatophytosis of the body	Dermatophytosis of body
KO	Deep seated dermatophytosis	Deep dermatophytosis
KO	Dermatophytosis of other specified sites	Dermatophytosis site NEC
KO	Dermatophytosis of unspecified site	Dermatophytosis site NOS
KO	Tinea nigra	Tinea nigra
[truncated: 12,568 more rows]

## Sheet: Variables
Variables	LONG DESCRIPTION	SHORT DESCRIPTION
ABILIFY
ACETAMINOPHEN
ACYCLOVIR
ADDERALL
ADVAIR
Age
ALBUTEROL
ALLEGRA
ALLOPURINOL
AMBIEN
AMLODIPINE
AMOXIL
ARICEPT
ASPIRIN
ATENOLOL
ATIVAN
AUGMENTIN
AVELOX
AZITHROMYCIN
BACTRIM
BENAZEPRIL
BENICAR
BETAMETHASONE
BMI
CALCIUM
CEFTIN
CELEBREX
CEPHALEXIN
Chantix
CholesterolDX
CIALIS
CIPRO
CITALOPRAM
CLARITIN
CLONIDINE
COREG
CORTISPORIN
COUMADIN
COZAAR
CRESTOR
CYMBALTA
DARVOCET
DEPO
DEXTROMETHORPHAN
Diabetes
DiastolicBP
DIFLUCAN
DIOVAN
DOXYCYCLINE
ECOTRIN
EFFEXOR
ENALAPRIL
FamilyDiabetesHistory
FamilyMetabolicRisk
FERROUS
FIORICET
FISH
FLAGYL
FLEXERIL
FLOMAX
FLONASE
FLUTICASONE
FOSAMAX
FUROSEMIDE
Gender
HighRiskLocation
HYDROCHLOROTHIAZIDE
HypertensionDX
IBUPROFEN
ICD009	Infectious colitis, enteritis, and gastroenteritis	Infectious enteritis NOS
ICD034	Streptococcal sore throat	Strep sore throat
ICD053	Herpes zoster with meningitis	Herpes zoster meningitis
ICD054	Eczema herpeticum	Eczema herpeticum
ICD070	Viral hepatitis A with hepatic coma	Hepatitis A with coma
ICD078	Molluscum contagiosum	Molluscum contagiosum
ICD079	Adenovirus infection in conditions classified elsewhere and of unspecified site	Adenovirus infect NOS
ICD110	Dermatophytosis of scalp and beard	Dermatophyt scalp/beard
ICD112	Candidiasis of mouth	Thrush
ICD216	Benign neoplasm of skin of lip	Benign neo skin lip
ICD238	Neoplasm of uncertain behavior of bone and articular cartilage	Unc behav neo bone
ICD244	Postsurgical hypothyroidism	Postsurgical hypothyroid
ICD250	Diabetes mellitus without mention of complication, type II or unspecified type, not stated as uncontrolled	DMII wo cmp nt st uncntr
ICD257	Testicular hyperfunction	Testicular hyperfunction
ICD266	Ariboflavinosis	Ariboflavinosis
ICD268	Rickets, active	Rickets, active
ICD274	Gouty arthropathy, unspecified	Gouty arthropathy NOS
ICD276	Hyperosmolality and/or hypernatremia	Hyperosmolality
ICD277	Cystic fibrosis without mention of meconium ileus	Cystic fibros w/o ileus
ICD280	Iron deficiency anemia secondary to blood loss (chronic)	Chr blood loss anemia
ICD281	Pernicious anemia	Pernicious anemia
ICD285	Sideroblastic anemia	Sideroblastic anemia
ICD290	Senile dementia, uncomplicated	Senile dementia uncomp
ICD295	Simple type schizophrenia, unspecified	Simpl schizophren-unspec
ICD296	Bipolar I disorder, single manic episode, unspecified	Bipol I single manic NOS
ICD300	Anxiety state, unspecified	Anxiety state NOS
ICD302	Ego-dystonic sexual orientation	Ego-dystonic sex orient
ICD304	Opioid type dependence, unspecified	Opioid dependence-unspec
ICD305	Alcohol abuse, unspecified	Alcohol abuse-unspec
ICD307	Adult onset fluency disorder	Adult onset flncy disord
ICD309	Adjustment disorder with depressed mood	Adjustmnt dis w depressn
ICD311	Depressive disorder, not elsewhere classified	Depressive disorder NEC
ICD314	Attention deficit disorder without mention of hyperactivity	Attn defic nonhyperact
ICD327	Organic insomnia, unspecified	Organic insomnia NOS
ICD333	Other degenerative diseases of the basal ganglia	Degen basal ganglia NEC
ICD338	Central pain syndrome	Central pain syndrome
ICD345	Generalized nonconvulsive epilepsy, without mention of intractable epilepsy	Gen noncv ep w/o intr ep
ICD346	Migraine with aura, without mention of intractable migraine without mention of status migrainosus	Mgrn w aura wo ntrc mgrn
ICD354	Carpal tunnel syndrome	Carpal tunnel syndrome
ICD356	Hereditary peripheral neuropathy	Hered periph neuropathy
ICD366	Nonsenile cataract, unspecified	Nonsenile cataract NOS
ICD372	Acute conjunctivitis, unspecified	Acute conjunctivitis NOS
ICD380	Perichondritis of pinna, unspecified	Perichondritis pinna NOS
ICD381	Acute nonsuppurative otitis media, unspecified	Ac nonsup otitis med NOS
ICD382	Acute suppurative otitis media without spontaneous rupture of eardrum	Ac supp otitis media NOS
ICD386	Ménière's disease, unspecified	Meniere's disease NOS
ICD388	Degenerative and vascular disorders, unspecified	Degen/vascul dis ear NOS
ICD389	Conductive hearing loss, unspecified	Conduct hearing loss NOS
ICD427	Paroxysmal supraventricular tachycardia	Parox atrial tachycardia
ICD428	Congestive heart failure, unspecified	CHF NOS
ICD438	Late effects of cerebrovascular disease, cognitive deficits	Late ef CV dis-cognf def
ICD443	Other peripheral vascular disease	Other peripheral vascular disease
ICD454	Varicose veins of lower extremities with ulcer	Leg varicosity w ulcer
ICD455	Internal hemorrhoids without mention of complication	Int hemorrhoid w/o compl
ICD458	Orthostatic hypotension	Orthostatic hypotension
ICD459	Hemorrhage, unspecified	Hemorrhage NOS
ICD460	Acute nasopharyngitis [common cold]	Acute nasopharyngitis
ICD461	Acute maxillary sinusitis	Ac maxillary sinusitis
ICD462	Acute pharyngitis	Acute pharyngitis
ICD465	Acute laryngopharyngitis	Acute laryngopharyngitis
ICD466	Acute bronchitis	Acute bronchitis
ICD473	Chronic maxillary sinusitis	Chr maxillary sinusitis
ICD477	Allergic rhinitis due to pollen	Rhinitis due to pollen
ICD478	Hypertrophy of nasal turbinates	Hypertrph nasal turbinat
ICD491	Simple chronic bronchitis	Simple chr bronchitis
ICD493	Extrinsic asthma, unspecified	Extrinsic asthma NOS
ICD496	Chronic airway obstruction, not elsewhere classified	Chr airway obstruct NEC
ICD530	Achalasia and cardiospasm	Achalasia & cardiospasm
ICD535	Acute gastritis, without mention of hemorrhage	Acute gastrtis w/o hmrhg
ICD536	Achlorhydria	Achlorhydria
ICD553	Femoral hernia without mention of obstruction of gangrene, unilateral or unspecified(not specified as recurrent)	Unilat femoral hernia
ICD562	Diverticulosis of small intestine (without mention of hemorrhage)	Dvrtclo sml int w/o hmrg
ICD564	Constipation, unspecified	Constipation NOS
ICD569	Anal and rectal polyp	Anal & rectal polyp
ICD585	Chronic kidney disease	Chro kidney dis
ICD592	Calculus of kidney	Calculus of kidney
ICD595	Acute cystitis	Acute cystitis
ICD599	Urinary tract infection, site not specified	Urin tract infection NOS
ICD600	Hypertrophy (benign) of prostate without urinary obstruction and other lower urinary tract symptom (LUTS)	BPH w/o urinary obs/LUTS
ICD607	Leukoplakia of penis	Leukoplakia of penis
ICD611	Inflammatory disease of breast	Inflam disease of breast
ICD616	Cervicitis and endocervicitis	Cervicitis
ICD625	Dyspareunia	Dyspareunia
ICD681	Cellulitis and abscess of finger, unspecified	Cellulitis, finger NOS
ICD682	Cellulitis and abscess of face	Cellulitis of face
ICD691	Diaper or napkin rash	Diaper or napkin rash
ICD692	Contact dermatitis and other eczema due to detergents	Detergent dermatitis
ICD696	Psoriatic arthropathy	Psoriatic arthropathy
ICD698	Pruritus ani	Pruritus ani
ICD702	Actinic keratosis	Actinic keratosis
ICD703	Ingrowing nail	Ingrowing nail
ICD704	Alopecia, unspecified	Alopecia NOS
ICD706	Acne varioliformis	Acne varioliformis
ICD708	Allergic urticaria	Allergic urticaria
ICD714	Rheumatoid arthritis	Rheumatoid arthritis
ICD715	Osteoarthrosis, generalized, site unspecified	General osteoarthrosis
ICD716	Kaschin-Beck disease, site unspecified	Kaschin-beck dis-unspec
ICD717	Old bucket handle tear of medial meniscus	Old bucket tear med men
ICD719	Effusion of joint, site unspecified	Joint effusion-unspec
ICD721	Cervical spondylosis without myelopathy	Cervical spondylosis
ICD722	Displacement of cervical intervertebral disc without myelopathy	Cervical disc displacmnt
ICD723	Spinal stenosis in cervical region	Cervical spinal stenosis
ICD724	Spinal stenosis, unspecified region	Spinal stenosis NOS
ICD726	Adhesive capsulitis of shoulder	Adhesive capsulit shlder
ICD727	Synovitis and tenosynovitis, unspecified	Synovitis NOS
ICD728	Infective myositis	Infective myositis
ICD729	Rheumatism, unspecified and fibrositis	Rheumatism NOS
ICD733	Osteoporosis, unspecified	Osteoporosis NOS
ICD780	Transient alteration of awareness	Trans alter awareness
ICD781	Abnormal involuntary movements	Abn involun movement NEC
ICD782	Disturbance of skin sensation	Skin sensation disturb
ICD783	Anorexia	Anorexia
ICD784	Headache	Headache
ICD785	Tachycardia, unspecified	Tachycardia NOS
ICD787	Nausea with vomiting	Nausea with vomiting
ICD788	Renal colic	Renal colic
ICD789	Abdominal pain, unspecified site	Abdmnal pain unspcf site
ICD790	Precipitous drop in hematocrit	Drop, hematocrit, precip
ICD794	Abnormal function study of brain and central nervous system, unspecified	Abn cns funct study NOS
ICD796	Nonspecific abnormal toxicological findings	Abn toxicologic finding
ICD799	Asphyxia	Asphyxia
ICD840	Acromioclavicular (joint) (ligament) sprain	Sprain acromioclavicular
ICD844	Sprain of lateral collateral ligament of knee	Sprain lateral coll lig
ICD847	Sprain of neck	Sprain of neck
ICD995	Other anaphylactic reaction	Other anaphylactic react
ICDV04	Need for prophylactic vaccination and inoculation against poliomyelitis	Vaccin for poliomyelitis
ICDV06	Need for prophylactic vaccination and inoculation against cholera with typhoid-paratyphoid [cholera + TAB]	Vaccin for cholera + tab
ICDV12	Personal history of unspecified infectious and parasitic disease	Prsnl hst unsp nfct prst
ICDV15	Allergy	Allergy
ICDV17	Family history of psychiatric condition	Fam hx-psychiatric cond
ICDV18	Family history of diabetes mellitus	Fam hx-diabetes mellitus
ICDV22	Supervision of normal first pregnancy	Supervis normal 1st preg
ICDV25	General counseling on prescription of oral contraceptives	Prescrip-oral contracept
ICDV45	Unspecified cardiac device in situ	Status cardc dvce unspcf
ICDV58	Encounter for radiotherapy	Radiotherapy encounter
ICDV65	Healthy person accompanying sick person	Healthy person w sick
ICDV70	Routine general medical examination at a health care facility	Routine medical exam
ICDV72	Examination of eyes and vision	Eye & vision examination
ICDV76	Special screening for malignant neoplasms of respiratory organs	Screen mal neop-resp org
ICDV77	Screening for thyroid disorders	Screen-thyroid disorder
ICDV85	Body Mass Index less than 19, adult	BMI less than 19,adult
KEFLEX
KLONOPIN
LAMISIL
LEVAQUIN
LEVOTHYROXINE
LEVOXYL
LEXAPRO
LIPITOR
LISINOPRIL
LODINE
LORTAB
LOTREL
LOTRISONE
LOVASTATIN
LOVAZA
LYRICA
MEDROL
MetabolicDX
METOPROLOL
MOBIC
MOTRIN
MUCINEX
NAPROSYN
NASONEX
NEURONTIN
NEXIUM
NIASPAN
NORCO
OMEPRAZOLE
OMNICEF
OXYCODONE
PAXIL
PercentAbnormalLabs
PERCOCET
PHENERGAN
PHENTERMINE
PLAVIX
PRAVACHOL
PRAVASTATIN
PREDNISONE
PREVACID
PRILOSEC
PRISTIQ
PROAIR
PROMETHAZINE
PROTONIX
PROZAC
PYRIDIUM
ROBAXIN
ROBITUSSIN
SEPTRA
SEROQUEL
seroquel
SIMVASTATIN
SINGULAIR
SmokingStatus_NISTCode
SOMA
SPIRIVA
State
State Diabetes Rate
SUBOXONE
SYMBICORT
SYNTHROID
SystolicBP
TESSALON
TOPROL
TotalAbnormalLabs
TotalAcute
TotalDiagnosesGeneral
TotalLabs
TotalMeds
TotalRiskFactors
TRAMADOL
TRAZODONE
TRIAMCINOLONE
TRICOR
TRILIPIX
TYLENOL
ULTRAM
VALIUM
VALTREX
VERAPAMIL
VIAGRA
VICODIN
VITAMIN
WELLBUTRIN
XANAX
ZITHROMAX
ZOLOFT
ZYRTEC

## Sheet: variabili pre-analysis
ABILIFY
ACETAMINOPHEN
ACYCLOVIR
ADDERALL
ADVAIR
Age
ALBUTEROL
ALLEGRA
ALLOPURINOL
AMBIEN
AMLODIPINE
AMOXIL
ARICEPT
ASPIRIN
ATENOLOL
ATIVAN
AUGMENTIN
AVELOX
AZITHROMYCIN
BACTRIM
BENAZEPRIL
BENICAR
BETAMETHASONE
BMI
CALCIUM
CEFTIN
CELEBREX
CEPHALEXIN
Chantix
CholesterolDX
CIALIS
CIPRO
CITALOPRAM
CLARITIN
CLONIDINE
COREG
CORTISPORIN
COUMADIN
COZAAR
CRESTOR
CYMBALTA
DARVOCET
DEPO
DEXTROMETHORPHAN
Diabetes
DIFLUCAN
DIOVAN
DOXYCYCLINE
ECOTRIN
EFFEXOR
ENALAPRIL
FamilyDiabetesHistory
FamilyMetabolicRisk
FERROUS
FIORICET
FISH
FLAGYL
FLEXERIL
FLOMAX
FLONASE
FLUTICASONE
FOSAMAX
FUROSEMIDE
Gender
HYDROCHLOROTHIAZIDE
HypertensionDX
IBUPROFEN
ICD009	Infectious colitis, enteritis, and gastroenteritis	Infectious enteritis NOS
ICD034	Streptococcal sore throat	Strep sore throat
ICD053	Herpes zoster with meningitis	Herpes zoster meningitis
ICD054	Eczema herpeticum	Eczema herpeticum
ICD070	Viral hepatitis A with hepatic coma	Hepatitis A with coma
ICD078	Molluscum contagiosum	Molluscum contagiosum
ICD079	Adenovirus infection in conditions classified elsewhere and of unspecified site	Adenovirus infect NOS
ICD110	Dermatophytosis of scalp and beard	Dermatophyt scalp/beard
ICD112	Candidiasis of mouth	Thrush
ICD216	Benign neoplasm of skin of lip	Benign neo skin lip
ICD238	Neoplasm of uncertain behavior of bone and articular cartilage	Unc behav neo bone
ICD244	Postsurgical hypothyroidism	Postsurgical hypothyroid
ICD257	Testicular hyperfunction	Testicular hyperfunction
ICD266	Ariboflavinosis	Ariboflavinosis
ICD268	Rickets, active	Rickets, active
ICD274	Gouty arthropathy, unspecified	Gouty arthropathy NOS
ICD276	Hyperosmolality and/or hypernatremia	Hyperosmolality
ICD277	Cystic fibrosis without mention of meconium ileus	Cystic fibros w/o ileus
ICD280	Iron deficiency anemia secondary to blood loss (chronic)	Chr blood loss anemia
ICD281	Pernicious anemia	Pernicious anemia
ICD285	Sideroblastic anemia	Sideroblastic anemia
ICD290	Senile dementia, uncomplicated	Senile dementia uncomp
ICD295	Simple type schizophrenia, unspecified	Simpl schizophren-unspec
ICD296	Bipolar I disorder, single manic episode, unspecified	Bipol I single manic NOS
ICD300	Anxiety state, unspecified	Anxiety state NOS
ICD302	Ego-dystonic sexual orientation	Ego-dystonic sex orient
ICD304	Opioid type dependence, unspecified	Opioid dependence-unspec
ICD305	Alcohol abuse, unspecified	Alcohol abuse-unspec
ICD309	Adjustment disorder with depressed mood	Adjustmnt dis w depressn
ICD311	Depressive disorder, not elsewhere classified	Depressive disorder NEC
ICD314	Attention deficit disorder without mention of hyperactivity	Attn defic nonhyperact
ICD327	Organic insomnia, unspecified	Organic insomnia NOS
ICD333	Other degenerative diseases of the basal ganglia	Degen basal ganglia NEC
ICD338	Central pain syndrome	Central pain syndrome
ICD345	Generalized nonconvulsive epilepsy, without mention of intractable epilepsy	Gen noncv ep w/o intr ep
ICD346	Migraine with aura, without mention of intractable migraine without mention of status migrainosus	Mgrn w aura wo ntrc mgrn
ICD354	Carpal tunnel syndrome	Carpal tunnel syndrome
ICD356	Hereditary peripheral neuropathy	Hered periph neuropathy
ICD366	Nonsenile cataract, unspecified	Nonsenile cataract NOS
ICD372	Acute conjunctivitis, unspecified	Acute conjunctivitis NOS
ICD380	Perichondritis of pinna, unspecified	Perichondritis pinna NOS
ICD381	Acute nonsuppurative otitis media, unspecified	Ac nonsup otitis med NOS
ICD382	Acute suppurative otitis media without spontaneous rupture of eardrum	Ac supp otitis media NOS
ICD386	Ménière's disease, unspecified	Meniere's disease NOS
ICD388	Degenerative and vascular disorders, unspecified	Degen/vascul dis ear NOS
ICD389	Conductive hearing loss, unspecified	Conduct hearing loss NOS
ICD427	Paroxysmal supraventricular tachycardia	Parox atrial tachycardia
ICD428	Congestive heart failure, unspecified	CHF NOS
ICD438	Late effects of cerebrovascular disease, cognitive deficits	Late ef CV dis-cognf def
ICD443	Other peripheral vascular disease	Other peripheral vascular disease
ICD454	Varicose veins of lower extremities with ulcer	Leg varicosity w ulcer
ICD455	Internal hemorrhoids without mention of complication	Int hemorrhoid w/o compl
ICD458	Orthostatic hypotension	Orthostatic hypotension
ICD459	Hemorrhage, unspecified	Hemorrhage NOS
ICD460	Acute nasopharyngitis [common cold]	Acute nasopharyngitis
ICD461	Acute maxillary sinusitis	Ac maxillary sinusitis
ICD462	Acute pharyngitis	Acute pharyngitis
ICD465	Acute laryngopharyngitis	Acute laryngopharyngitis
ICD466	Acute bronchitis	Acute bronchitis
ICD473	Chronic maxillary sinusitis	Chr maxillary sinusitis
ICD477	Allergic rhinitis due to pollen	Rhinitis due to pollen
ICD478	Hypertrophy of nasal turbinates	Hypertrph nasal turbinat
ICD491	Simple chronic bronchitis	Simple chr bronchitis
ICD493	Extrinsic asthma, unspecified	Extrinsic asthma NOS
ICD496	Chronic airway obstruction, not elsewhere classified	Chr airway obstruct NEC
ICD530	Achalasia and cardiospasm	Achalasia & cardiospasm
ICD535	Acute gastritis, without mention of hemorrhage	Acute gastrtis w/o hmrhg
ICD536	Achlorhydria	Achlorhydria
ICD553	Femoral hernia without mention of obstruction of gangrene, unilateral or unspecified(not specified as recurrent)	Unilat femoral hernia
ICD562	Diverticulosis of small intestine (without mention of hemorrhage)	Dvrtclo sml int w/o hmrg
ICD564	Constipation, unspecified	Constipation NOS
ICD569	Anal and rectal polyp	Anal & rectal polyp
ICD585	Chronic kidney disease	Chro kidney dis
ICD592	Calculus of kidney	Calculus of kidney
ICD595	Acute cystitis	Acute cystitis
ICD599	Urinary tract infection, site not specified	Urin tract infection NOS
ICD600	Hypertrophy (benign) of prostate without urinary obstruction and other lower urinary tract symptom (LUTS)	BPH w/o urinary obs/LUTS
ICD607	Leukoplakia of penis	Leukoplakia of penis
ICD611	Inflammatory disease of breast	Inflam disease of breast
ICD616	Cervicitis and endocervicitis	Cervicitis
ICD625	Dyspareunia	Dyspareunia
ICD681	Cellulitis and abscess of finger, unspecified	Cellulitis, finger NOS
ICD682	Cellulitis and abscess of face	Cellulitis of face
ICD691	Diaper or napkin rash	Diaper or napkin rash
ICD692	Contact dermatitis and other eczema due to detergents	Detergent dermatitis
ICD696	Psoriatic arthropathy	Psoriatic arthropathy
ICD698	Pruritus ani	Pruritus ani
ICD702	Actinic keratosis	Actinic keratosis
ICD703	Ingrowing nail	Ingrowing nail
ICD704	Alopecia, unspecified	Alopecia NOS
ICD706	Acne varioliformis	Acne varioliformis
ICD708	Allergic urticaria	Allergic urticaria
ICD714	Rheumatoid arthritis	Rheumatoid arthritis
ICD715	Osteoarthrosis, generalized, site unspecified	General osteoarthrosis
ICD716	Kaschin-Beck disease, site unspecified	Kaschin-beck dis-unspec
ICD717	Old bucket handle tear of medial meniscus	Old bucket tear med men
ICD719	Effusion of joint, site unspecified	Joint effusion-unspec
ICD721	Cervical spondylosis without myelopathy	Cervical spondylosis
ICD722	Displacement of cervical intervertebral disc without myelopathy	Cervical disc displacmnt
ICD723	Spinal stenosis in cervical region	Cervical spinal stenosis
ICD724	Spinal stenosis, unspecified region	Spinal stenosis NOS
ICD726	Adhesive capsulitis of shoulder	Adhesive capsulit shlder
ICD727	Synovitis and tenosynovitis, unspecified	Synovitis NOS
ICD728	Infective myositis	Infective myositis
ICD729	Rheumatism, unspecified and fibrositis	Rheumatism NOS
ICD733	Osteoporosis, unspecified	Osteoporosis NOS
ICD781	Abnormal involuntary movements	Abn involun movement NEC
ICD782	Disturbance of skin sensation	Skin sensation disturb
ICD783	Anorexia	Anorexia
ICD784	Headache	Headache
ICD785	Tachycardia, unspecified	Tachycardia NOS
ICD787	Nausea with vomiting	Nausea with vomiting
ICD788	Renal colic	Renal colic
ICD789	Abdominal pain, unspecified site	Abdmnal pain unspcf site
ICD790	Precipitous drop in hematocrit	Drop, hematocrit, precip
ICD799	Asphyxia	Asphyxia
ICD840	Acromioclavicular (joint) (ligament) sprain	Sprain acromioclavicular
ICD844	Sprain of lateral collateral ligament of knee	Sprain lateral coll lig
ICD847	Sprain of neck	Sprain of neck
ICD995	Other anaphylactic reaction	Other anaphylactic react
ICDV04	Need for prophylactic vaccination and inoculation against poliomyelitis	Vaccin for poliomyelitis
ICDV06	Need for prophylactic vaccination and inoculation against cholera with typhoid-paratyphoid [cholera + TAB]	Vaccin for cholera + tab
ICDV12	Personal history of unspecified infectious and parasitic disease	Prsnl hst unsp nfct prst
ICDV15	Allergy	Allergy
ICDV17	Family history of psychiatric condition	Fam hx-psychiatric cond
ICDV18	Family history of diabetes mellitus	Fam hx-diabetes mellitus
ICDV25	General counseling on prescription of oral contraceptives	Prescrip-oral contracept
ICDV45	Unspecified cardiac device in situ	Status cardc dvce unspcf
ICDV58	Encounter for radiotherapy	Radiotherapy encounter
ICDV70	Routine general medical examination at a health care facility	Routine medical exam
ICDV72	Examination of eyes and vision	Eye & vision examination
ICDV76	Special screening for malignant neoplasms of respiratory organs	Screen mal neop-resp org
ICDV77	Screening for thyroid disorders	Screen-thyroid disorder
KEFLEX
KLONOPIN
LAMISIL
LEVAQUIN
LEVOTHYROXINE
LEVOXYL
LEXAPRO
LIPITOR
LISINOPRIL
LODINE
LORTAB
LOTREL
LOTRISONE
LOVASTATIN
LOVAZA
LYRICA
MEDROL
MetabolicDX
METOPROLOL
MOBIC
MOTRIN
MUCINEX
NAPROSYN
NASONEX
NEURONTIN
NEXIUM
NIASPAN
NORCO
OMEPRAZOLE
OMNICEF
OXYCODONE
PAXIL
PERCOCET
PHENERGAN
PHENTERMINE
PLAVIX
PRAVACHOL
PRAVASTATIN
PREDNISONE
PREVACID
PRILOSEC
PRISTIQ
PROAIR
PROMETHAZINE
PROTONIX
PROZAC
PYRIDIUM
ROBAXIN
ROBITUSSIN
SEPTRA
SEROQUEL
seroquel
SIMVASTATIN
SINGULAIR
SOMA
SPIRIVA
SUBOXONE
SYMBICORT
SYNTHROID
TESSALON
TOPROL
TRAMADOL
TRAZODONE
TRIAMCINOLONE
TRICOR
TRILIPIX
TYLENOL
ULTRAM
VALIUM
VALTREX
VERAPAMIL
VIAGRA
VICODIN
VITAMIN
WELLBUTRIN
XANAX
ZITHROMAX
ZOLOFT
ZYRTEC

## Sheet: imp_rf
Variable	MeanDecreaseAccuracy			Variable	MeanDecreaseGini
HypertensionDX	50.2426	0.996416		Age	182.311	0.996416
CholesterolDX	39.5162	0.992832		HypertensionDX	114.804	0.992832
LISINOPRIL	33.1642	0.989247		CholesterolDX	90.599	0.989247
ICD585	24.3271	0.985663		BMI	47.6374	0.985663
Age	23.5889	0.982079		ICD585	36.1432	0.982079
LOVASTATIN	22.4042	0.978495		LISINOPRIL	34.3941	0.978495
SIMVASTATIN	20.9047	0.97491		Gender	24.2028	0.97491
ICD428	18.2168	0.971326		SIMVASTATIN	20.2213	0.971326
COZAAR	16.1915	0.967742		ICD715	19.4475	0.967742
ENALAPRIL	15.3475	0.964158		ICD530	19.2932	0.964158
ASPIRIN	15.1741	0.960573		ICDV70	18.7049	0.960573
BENAZEPRIL	14.4333	0.956989		ICD724	18.6712	0.956989
ECOTRIN	13.0459	0.953405		LIPITOR	18.2252	0.953405
ICDV77	12.9126	0.949821		ICD790	17.8049	0.949821
ICD443	12.9041	0.946237		ICD300	17.7878	0.946237
LIPITOR	12.8673	0.942652		ICD285	17.7305	0.942652
ICD790	12.145	0.939068		ASPIRIN	16.9104	0.939068
PRAVASTATIN	11.8939	0.935484		ICD466	16.6859	0.935484
ICD459	11.6273	0.9319		ICD477	16.4241	0.9319
COREG	11.3501	0.928315		ICD782	16.3031	0.928315
PLAVIX	10.7572	0.924731		ICD268	16.0851	0.924731
ICD781	10.6928	0.921147		HYDROCHLOROTHIAZIDE	15.8205	0.921147
ICD733	10.4266	0.917563		ICD244	15.788	0.917563
FUROSEMIDE	10.4217	0.913978		ICD719	15.5665	0.913978
TRICOR	10.2858	0.910394		ICD428	15.2793	0.910394
LYRICA	10.0668	0.90681		ICD599	13.8411	0.90681
BENICAR	9.79028	0.903226		ICD465	13.7767	0.903226
ICD274	9.49112	0.899642		ICD274	13.7279	0.899642
CRESTOR	9.42342	0.896057		ICD443	13.6335	0.896057
DIFLUCAN	9.38381	0.892473		COZAAR	13.5974	0.892473
ICD257	9.08546	0.888889		ICD733	13.0646	0.888889
ICD285	8.83674	0.885305		ICD461	13.0515	0.885305
TOPROL	8.77639	0.88172		ICDV04	12.8319	0.88172
ICDV70	8.54018	0.878136		TOPROL	12.6934	0.878136
Gender	8.40881	0.874552		ICD493	12.6776	0.874552
ICD268	8.2865	0.870968		ICD110	12.4788	0.870968
ICD295	8.27275	0.867384		CRESTOR	12.2774	0.867384
METOPROLOL	7.98962	0.863799		ICD496	12.1946	0.863799
LOTRISONE	7.71126	0.860215		ICD327	12.0749	0.860215
ICD302	7.70376	0.856631		AMLODIPINE	11.976	0.856631
LOVAZA	7.68448	0.853047		ICD427	11.9361	0.853047
PRAVACHOL	7.68164	0.849462		ICD305	11.8802	0.849462
ICD681	7.40309	0.845878		ECOTRIN	11.8371	0.845878
ICD356	7.33805	0.842294		ICD781	11.795	0.842294
LORTAB	7.30563	0.83871		ICD789	11.7413	0.83871
ICD496	7.25603	0.835125		ICD788	11.7283	0.835125
AMLODIPINE	7.11967	0.831541		ICD726	11.6944	0.831541
ICD438	6.62152	0.827957		ICD564	11.5131	0.827957
ICD354	6.44168	0.824373		LOVASTATIN	11.5122	0.824373
TRILIPIX	6.38011	0.820789		ICD682	11.5014	0.820789
ICD427	6.23066	0.817204		ICD600	11.2639	0.817204
HYDROCHLOROTHIAZIDE	6.20659	0.81362		ICD729	11.192	0.81362
ICD703	6.17414	0.810036		VITAMIN	10.9338	0.810036
ICD366	6.14821	0.806452		ICD787	10.6626	0.806452
ICD053	6.02163	0.802867		ICD311	10.3765	0.802867
BETAMETHASONE	5.88866	0.799283		COREG	10.3469	0.799283
ICD698	5.81916	0.795699		DIOVAN	10.2327	0.795699
SOMA	5.51879	0.792115		ZITHROMAX	10.2118	0.792115
DIOVAN	5.47139	0.78853		METOPROLOL	10.2027	0.78853
ADVAIR	5.44011	0.784946		ICD296	10.1409	0.784946
ICD715	5.25418	0.781362		ICD785	9.89178	0.781362
ICD782	5.24718	0.777778		ICD380	9.70446	0.777778
VITAMIN	5.02885	0.774194		ICD356	9.66411	0.774194
XANAX	5.0144	0.770609		ICD607	9.53582	0.770609
BACTRIM	4.93822	0.767025		PRAVASTATIN	9.48563	0.767025
PHENERGAN	4.77066	0.763441		ENALAPRIL	9.39001	0.763441
ICD009	4.74971	0.759857		ICD257	9.37475	0.759857
CLONIDINE	4.65994	0.756272		ICDV72	9.35058	0.756272
ICD466	4.65111	0.752688		ICD784	9.34122	0.752688
ICD530	4.59414	0.749104		TRICOR	9.17258	0.749104
CALCIUM	4.57388	0.74552		FUROSEMIDE	9.1507	0.74552
Chantix	4.48462	0.741935		PLAVIX	9.09615	0.741935
ICD460	4.45037	0.738351		ICD692	9.07608	0.738351
ATENOLOL	4.41928	0.734767		ATENOLOL	8.8766	0.734767
ICD714	4.40569	0.731183		ICD722	8.67145	0.731183
COUMADIN	4.32179	0.727599		BENICAR	8.64831	0.727599
NIASPAN	4.28721	0.724014		ICD276	8.45806	0.724014
PREDNISONE	4.28684	0.72043		ICD728	8.31552	0.72043
ICD682	4.26748	0.716846		LEVOTHYROXINE	8.27687	0.716846
ICDV72	4.22775	0.713262		ICD783	8.10708	0.713262
ICD788	4.20071	0.709677		ICDV15	8.02832	0.709677
ICD995	4.16156	0.706093		ICDV58	7.86797	0.706093
ICD536	4.05597	0.702509		ICD438	7.77441	0.702509
ICD607	3.93772	0.698925		PRAVACHOL	7.73016	0.698925
ICD290	3.85632	0.695341		ICD053	7.46583	0.695341
ICD787	3.85124	0.691756		ICD462	7.45784	0.691756
ICD599	3.78193	0.688172		ICD459	7.4229	0.688172
ICD079	3.74197	0.684588		ICD723	7.412	0.684588
ICD462	3.74091	0.681004		CIPRO	7.39012	0.681004
ICD381	3.66876	0.677419		SYNTHROID	7.35803	0.677419
ICD300	3.66009	0.673835		ICD714	7.23615	0.673835
ZYRTEC	3.64746	0.670251		OMEPRAZOLE	7.06655	0.670251
MetabolicDX	3.46591	0.666667		ICD302	7.06455	0.666667
ICD727	3.463	0.663082		AUGMENTIN	7.03461	0.663082
CEPHALEXIN	3.36699	0.659498		ICDV76	6.99559	0.659498
ZITHROMAX	3.19903	0.655914		ICD536	6.89794	0.655914
ICDV45	3.1887	0.65233		TRILIPIX	6.73233	0.65233
ICDV15	3.16486	0.648746		ICD295	6.59495	0.648746
ICD070	3.14706	0.645161		BACTRIM	6.52994	0.645161
ICD783	3.11322	0.641577		ICD535	6.52712	0.641577
ALLOPURINOL	3.08916	0.637993		ICDV45	6.49356	0.637993
SPIRIVA	3.07493	0.634409		ICD386	6.48293	0.634409
EFFEXOR	3.049	0.630824		LEVAQUIN	6.47874	0.630824
CIALIS	2.97885	0.62724		VICODIN	6.43299	0.62724
LEVAQUIN	2.96946	0.623656		ICD847	6.41424	0.623656
ICD110	2.95157	0.620072		NEXIUM	6.34484	0.620072
ICD726	2.8976	0.616487		ICD681	6.33982	0.616487
VIAGRA	2.88391	0.612903		ICD995	6.33393	0.612903
ICD600	2.86979	0.609319		LYRICA	6.30868	0.609319
CELEBREX	2.86592	0.605735		ICD280	6.29439	0.605735
FERROUS	2.82854	0.602151		ADVAIR	6.20736	0.602151
ICD305	2.75478	0.598566		ICD372	6.20723	0.598566
ICD535	2.70081	0.594982		ICD460	6.1929	0.594982
VERAPAMIL	2.61622	0.591398		ICD346	6.13556	0.591398
ICD847	2.60721	0.587814		ICD716	6.13088	0.587814
ICD244	2.59737	0.584229		ICD281	6.11915	0.584229
DEPO	2.54027	0.580645		BENAZEPRIL	6.03209	0.580645
ICD724	2.52883	0.577061		CELEBREX	5.99996	0.577061
ICD706	2.48534	0.573477		NIASPAN	5.93241	0.573477
AUGMENTIN	2.44747	0.569892		ICD009	5.92668	0.569892
PAXIL	2.43831	0.566308		ICD491	5.87402	0.566308
SYNTHROID	2.41685	0.562724		PREDNISONE	5.82176	0.562724
ICD491	2.40143	0.55914		ICD691	5.81268	0.55914
ICD564	2.38834	0.555556		ICD366	5.79195	0.555556
ACYCLOVIR	2.33373	0.551971		LORTAB	5.6983	0.551971
FOSAMAX	2.30108	0.548387		FLEXERIL	5.65356	0.548387
DOXYCYCLINE	2.26712	0.544803		ICD070	5.63268	0.544803
ICD691	2.23666	0.541219		ICD333	5.61456	0.541219
ICD465	2.23445	0.537634		ICD381	5.61202	0.537634
SEPTRA	2.21833	0.53405		SINGULAIR	5.59007	0.53405
ICD478	2.19808	0.530466		ICD338	5.56085	0.530466
ICD458	2.16685	0.526882		FLONASE	5.48519	0.526882
VALIUM	2.13909	0.523297		LOVAZA	5.45508	0.523297
TYLENOL	2.07095	0.519713		ICD727	5.39172	0.519713
LAMISIL	2.03864	0.516129		XANAX	5.38702	0.516129
AMBIEN	2.01217	0.512545		ICD696	5.38199	0.512545
ICDV25	2.00276	0.508961		ICD592	5.35939	0.508961
ICD327	1.99493	0.505376		ICD706	5.32462	0.505376
ICD296	1.97404	0.501792		TRAMADOL	5.32401	0.501792
ICD692	1.97237	0.498208		LOTRISONE	5.29583	0.498208
FLAGYL	1.93693	0.494624		ICD290	5.15682	0.494624
LOTREL	1.86274	0.491039		ZYRTEC	5.10938	0.491039
ICD386	1.86157	0.487455		ICD354	5.10037	0.487455
ICDV04	1.85544	0.483871		CLONIDINE	5.07727	0.483871
OMEPRAZOLE	1.84696	0.480287		ALLEGRA	5.02892	0.480287
ICD078	1.84633	0.476703		ICD562	5.02063	0.476703
ICD461	1.84263	0.473118		MetabolicDX	5.01799	0.473118
OXYCODONE	1.84191	0.469534		ICD595	5.01165	0.469534
ICD717	1.82337	0.46595		ICD702	4.98039	0.46595
SYMBICORT	1.75583	0.462366		LOTREL	4.96033	0.462366
CLARITIN	1.7466	0.458781		ACETAMINOPHEN	4.93546	0.458781
ICD553	1.71502	0.455197		ICD455	4.85162	0.455197
ICD054	1.70024	0.451613		SEPTRA	4.83491	0.451613
ICD266	1.68446	0.448029		PRILOSEC	4.83419	0.448029
ICD704	1.68076	0.444444		AMBIEN	4.80662	0.444444
ACETAMINOPHEN	1.65028	0.44086		ICD277	4.77388	0.44086
ICD729	1.58661	0.437276		TYLENOL	4.77387	0.437276
NAPROSYN	1.54014	0.433692		ALLOPURINOL	4.74325	0.433692
ICDV58	1.46651	0.430108		ICD840	4.74045	0.430108
MOBIC	1.4279	0.426523		ICD389	4.64483	0.426523
ICD281	1.4249	0.422939		ICD721	4.51828	0.422939
ICD785	1.32882	0.419355		KEFLEX	4.50805	0.419355
ICDV76	1.24438	0.415771		ICD388	4.50608	0.415771
ICD455	1.22215	0.412186		ICD266	4.49754	0.412186
ICD840	1.15856	0.408602		ICD553	4.46191	0.408602
SUBOXONE	1.14238	0.405018		MEDROL	4.43587	0.405018
CORTISPORIN	1.09539	0.401434		ICDV12	4.40193	0.401434
ICD728	1.08802	0.397849		ALBUTEROL	4.35256	0.397849
ICD034	1.05331	0.394265		PROMETHAZINE	4.30222	0.394265
ICD696	1.02816	0.390681		MOBIC	4.28455	0.390681
ICD276	1.00676	0.387097		PERCOCET	4.2503	0.387097
ICD789	1.00512	0.383513		ICD382	4.24697	0.383513
FamilyMetabolicRisk	1.00072	0.379928		ICD079	4.23672	0.379928
PRILOSEC	0.968786	0.376344		ICD454	4.23416	0.376344
DEXTROMETHORPHAN	0.958533	0.37276		FISH	4.22347	0.37276
PERCOCET	0.925347	0.369176		CEPHALEXIN	4.20161	0.369176
ICD333	0.905811	0.365591		ICD703	4.17666	0.365591
ICD304	0.886704	0.362007		AZITHROMYCIN	4.16423	0.362007
ICD238	0.885245	0.358423		ICD799	4.13031	0.358423
FLONASE	0.880212	0.354839		PHENERGAN	4.12042	0.354839
ICD311	0.848162	0.351254		ICD698	4.10217	0.351254
NEXIUM	0.8477	0.34767		NASONEX	4.05686	0.34767
FamilyDiabetesHistory	0.837185	0.344086		ICD458	4.05161	0.344086
LODINE	0.778471	0.340502		ICD717	4.01927	0.340502
VICODIN	0.776095	0.336918		Chantix	4.01184	0.336918
NEURONTIN	0.731809	0.333333		ICD704	3.9907	0.333333
ICD280	0.723214	0.329749		DIFLUCAN	3.96668	0.329749
CIPRO	0.708851	0.326165		CIALIS	3.96495	0.326165
MEDROL	0.669099	0.322581		ICD112	3.93312	0.322581
ICD595	0.635368	0.318996		NAPROSYN	3.8697	0.318996
PROMETHAZINE	0.608306	0.315412		FamilyDiabetesHistory	3.83626	0.315412
LEXAPRO	0.592948	0.311828		ICDV18	3.83607	0.311828
ICD388	0.562631	0.308244		VIAGRA	3.79886	0.308244
MUCINEX	0.555646	0.304659		DOXYCYCLINE	3.76773	0.304659
FLEXERIL	0.550678	0.301075		ICD238	3.68637	0.301075
ICDV06	0.501529	0.297491		CALCIUM	3.67152	0.297491
ICD844	0.497917	0.293907		NEURONTIN	3.66527	0.293907
ICD380	0.480212	0.290323		FLOMAX	3.65756	0.290323
ICD314	0.465373	0.286738		EFFEXOR	3.65388	0.286738
TRAMADOL	0.457578	0.283154		ICD708	3.6536	0.283154
ICD338	0.455098	0.27957		CYMBALTA	3.64159	0.27957
SINGULAIR	0.41134	0.275986		ICD309	3.63298	0.275986
ADDERALL	0.409967	0.272401		ZOLOFT	3.60618	0.272401
ICD784	0.399495	0.268817		ICD054	3.54404	0.268817
ICD345	0.336358	0.265233		FOSAMAX	3.45203	0.265233
ICD723	0.328899	0.261649		ICD034	3.4504	0.261649
ICD277	0.324994	0.258065		ICD345	3.34305	0.258065
ICD346	0.279376	0.25448		LEXAPRO	3.33648	0.25448
ICDV18	0.0633961	0.250896		ICD078	3.28874	0.250896
LEVOTHYROXINE	0.0412084	0.247312		ICD625	3.27571	0.247312
CEFTIN	0.00541406	0.243728		ICDV77	3.23845	0.243728
ABILIFY	0.00309225	0.240143		ICD216	3.20389	0.240143
seroquel	0.00126374	0.236559		ICD473	3.18211	0.236559
ICD372	0.000352433	0.232975		COUMADIN	3.15857	0.232975
PROAIR	-0.0217587	0.229391		TRIAMCINOLONE	3.09788	0.229391
AVELOX	-0.0362834	0.225806		VERAPAMIL	3.07036	0.225806
ROBITUSSIN	-0.0568465	0.222222		CLARITIN	3.05479	0.222222
OMNICEF	-0.0644994	0.218638		SPIRIVA	2.9843	0.218638
ICD112	-0.0908502	0.215054		FERROUS	2.9754	0.215054
ICD493	-0.0989762	0.21147		IBUPROFEN	2.96133	0.21147
ICD719	-0.103963	0.207885		TRAZODONE	2.9492	0.207885
ICD799	-0.151431	0.204301		MUCINEX	2.88758	0.204301
ICD722	-0.165851	0.200717		ICD569	2.86485	0.200717
KEFLEX	-0.172696	0.197133		PROAIR	2.76556	0.197133
NORCO	-0.190359	0.193548		AMOXIL	2.71497	0.193548
FIORICET	-0.190604	0.189964		ICD478	2.68862	0.189964
DARVOCET	-0.203253	0.18638		ICD616	2.67575	0.18638
ICD716	-0.224294	0.182796		MOTRIN	2.57725	0.182796
ICD616	-0.225578	0.179211		AVELOX	2.57563	0.179211
ICD592	-0.261883	0.175627		DEXTROMETHORPHAN	2.575	0.175627
ICDV17	-0.279825	0.172043		CITALOPRAM	2.57251	0.172043
FISH	-0.285728	0.168459		LAMISIL	2.55032	0.168459
ATIVAN	-0.329051	0.164875		BETAMETHASONE	2.52538	0.164875
ICD562	-0.350536	0.16129		SOMA	2.51478	0.16129
AMOXIL	-0.361318	0.157706		ICDV17	2.50026	0.157706
VALTREX	-0.379133	0.154122		PROTONIX	2.46974	0.154122
PREVACID	-0.443302	0.150538		ULTRAM	2.45159	0.150538
ZOLOFT	-0.444473	0.146953		DARVOCET	2.35217	0.146953
KLONOPIN	-0.44614	0.143369		PHENTERMINE	2.24739	0.143369
TRIAMCINOLONE	-0.453842	0.139785		PREVACID	2.22024	0.139785
PYRIDIUM	-0.485954	0.136201		CEFTIN	2.16766	0.136201
ALLEGRA	-0.541416	0.132616		ARICEPT	2.16449	0.132616
MOTRIN	-0.559883	0.129032		FLAGYL	2.12728	0.129032
ICD721	-0.638991	0.125448		CORTISPORIN	2.1109	0.125448
TESSALON	-0.661152	0.121864		ROBITUSSIN	2.09526	0.121864
WELLBUTRIN	-0.664548	0.11828		ICD611	2.01738	0.11828
FLOMAX	-0.720899	0.114695		seroquel	2.00221	0.114695
NASONEX	-0.793789	0.111111		ICD844	1.9851	0.111111
ICD389	-0.869225	0.107527		NORCO	1.96345	0.107527
ROBAXIN	-0.886072	0.103943		PYRIDIUM	1.91182	0.103943
ALBUTEROL	-0.94337	0.100358		ATIVAN	1.78423	0.100358
PHENTERMINE	-0.96904	0.0967742		SYMBICORT	1.76834	0.0967742
CYMBALTA	-1.02559	0.09319		LEVOXYL	1.76787	0.09319
ICD454	-1.02775	0.0896057		ICDV06	1.64179	0.0896057
ICD473	-1.05843	0.0860215		TESSALON	1.63285	0.0860215
IBUPROFEN	-1.11734	0.0824373		FLUTICASONE	1.61516	0.0824373
ICD477	-1.15036	0.078853		PAXIL	1.58684	0.078853
ICD708	-1.2001	0.0752688		WELLBUTRIN	1.5771	0.0752688
ICD309	-1.2359	0.0716846		LODINE	1.57528	0.0716846
ICD611	-1.35963	0.0681004		PROZAC	1.50435	0.0681004
SEROQUEL	-1.36219	0.0645161		ACYCLOVIR	1.49762	0.0645161
ICDV12	-1.44761	0.0609319		PRISTIQ	1.38425	0.0609319
ICD702	-1.55255	0.0573477		OMNICEF	1.3587	0.0573477
ICD625	-1.62832	0.0537634		ICD304	1.24469	0.0537634
FLUTICASONE	-1.84525	0.0501792		VALTREX	1.22222	0.0501792
ICD216	-1.86993	0.046595		ABILIFY	1.13429	0.046595
PRISTIQ	-1.92159	0.0430108		VALIUM	1.11039	0.0430108
ULTRAM	-1.98606	0.0394265		ICD314	1.03767	0.0394265
TRAZODONE	-2.04086	0.0358423		ROBAXIN	1.03495	0.0358423
ARICEPT	-2.0885	0.0322581		DEPO	0.9893	0.0322581
LEVOXYL	-2.40557	0.0286738		FIORICET	0.890715	0.0286738
BMI	-2.44349	0.0250896		SEROQUEL	0.879348	0.0250896
ICD382	-2.44747	0.0215054		OXYCODONE	0.765084	0.0215054
ICD569	-2.47048	0.0179211		ICDV25	0.743461	0.0179211
AZITHROMYCIN	-2.55123	0.0143369		KLONOPIN	0.619978	0.0143369
PROZAC	-3.03783	0.0107527		ADDERALL	0.339494	0.0107527
PROTONIX	-3.07549	0.00716846		SUBOXONE	0.188571	0.00716846
CITALOPRAM	-3.22007	0.00358423		FamilyMetabolicRisk	0.075224	0.00358423

## Sheet: RF pre-logistics
Age
ASPIRIN
BENAZEPRIL
BMI
CholesterolDX
COZAAR
ECOTRIN
ENALAPRIL
Gender
HypertensionDX
ICD428	Congestive heart failure, unspecified	CHF NOS
ICD443	Other peripheral vascular disease	Other peripheral vascular disease
ICD459	Hemorrhage, unspecified	Hemorrhage NOS
ICD530	Achalasia and cardiospasm	Achalasia & cardiospasm
ICD585	Chronic kidney disease	Chro kidney dis
ICD715	Osteoarthrosis, generalized, site unspecified	General osteoarthrosis
ICD724	Spinal stenosis, unspecified region	Spinal stenosis NOS
ICD790	Precipitous drop in hematocrit	Drop, hematocrit, precip
ICDV70	Routine general medical examination at a health care facility	Routine medical exam
ICDV77	Screening for thyroid disorders	Screen-thyroid disorder
LIPITOR
LISINOPRIL
LOVASTATIN
PRAVASTATIN
SIMVASTATIN

## Sheet: lasso pre-logistics
ASPIRIN
BMI
CholesterolDX
COREG
COUMADIN
COZAAR
CRESTOR
DEPO
ECOTRIN
ENALAPRIL
FUROSEMIDE
HypertensionDX
IBUPROFEN
ICD054	Eczema herpeticum	Eczema herpeticum
ICD285	Sideroblastic anemia	Sideroblastic anemia
ICD295	Simple type schizophrenia, unspecified	Simpl schizophren-unspec
ICD300	Anxiety state, unspecified	Anxiety state NOS
ICD302	Ego-dystonic sexual orientation	Ego-dystonic sex orient
ICD314	Attention deficit disorder without mention of hyperactivity	Attn defic nonhyperact
ICD346	Migraine with aura, without mention of intractable migraine without mention of status migrainosus	Mgrn w aura wo ntrc mgrn
ICD428	Congestive heart failure, unspecified	CHF NOS
ICD438	Late effects of cerebrovascular disease, cognitive deficits	Late ef CV dis-cognf def
ICD443	Other peripheral vascular disease	Other peripheral vascular disease
ICD455	Internal hemorrhoids without mention of complication	Int hemorrhoid w/o compl
ICD459	Hemorrhage, unspecified	Hemorrhage NOS
ICD461	Acute maxillary sinusitis	Ac maxillary sinusitis
ICD462	Acute pharyngitis	Acute pharyngitis
ICD477	Allergic rhinitis due to pollen	Rhinitis due to pollen
ICD585	Chronic kidney disease	Chro kidney dis
ICD681	Cellulitis and abscess of finger, unspecified	Cellulitis, finger NOS
ICD715	Osteoarthrosis, generalized, site unspecified	General osteoarthrosis
ICD723	Spinal stenosis in cervical region	Cervical spinal stenosis
ICD724	Spinal stenosis, unspecified region	Spinal stenosis NOS
ICD727	Synovitis and tenosynovitis, unspecified	Synovitis NOS
ICD781	Abnormal involuntary movements	Abn involun movement NEC
ICD782	Disturbance of skin sensation	Skin sensation disturb
ICDV04	Need for prophylactic vaccination and inoculation against poliomyelitis	Vaccin for poliomyelitis
ICDV70	Routine general medical examination at a health care facility	Routine medical exam
ICDV72	Examination of eyes and vision	Eye & vision examination
ICDV77	Screening for thyroid disorders	Screen-thyroid disorder
LEXAPRO
LIPITOR
LISINOPRIL
LODINE
LOVASTATIN
LYRICA
MetabolicDX
OXYCODONE
PHENTERMINE
PREDNISONE
ROBAXIN
SIMVASTATIN
SOMA
TRICOR
VALIUM

## Sheet: summ_rf
Variable	Estimate	Std,Error	z value	Pr(>|z|)	Significance
ICD790	-0.097419	0.10021	-0.972	0.330973
ICD585	0.82287	0.127453	6.456	1.07e-10	***
ICD428	0.677048	0.161649	4.188	2.81e-05	***
ICD443	0.420336	0.164056	2.562	0.010403	*
ICDV77	-1,849,833	0.527436	-3.507	0.000453	***
ICD459	0.460085	0.228882	2.01	0.044416	*
HypertensionDX	0.936692	0.065622	14.274	2e-16	***
CholesterolDX	0.826716	0.062472	13.233	2e-16	***
LISINOPRIL	0.398586	0.088719	4.493	7.03e-06	***
LIPITOR	0.237403	0.105953	2.241	0.025049	*
SIMVASTATIN	0.244048	0.105563	2.312	0.020785	*
ASPIRIN	0.398492	0.134254	2.968	0.002996	**
PRAVASTATIN	0.439678	0.205024	2.145	0.031992	*
ECOTRIN	0.597266	0.200025	2.986	0.002827	**
LOVASTATIN	0.464584	0.219123	2.12	0.03399	*
COZAAR	0.98895	0.219068	4.514	6.35e-06	***
BENAZEPRIL	0.141233	0.260929	0.541	0.588321
ENALAPRIL	0.673751	0.246368	2.735	0.006243	**
Age	0.014368	0.002316	6.203	5.53e-10	***
Gender	0.256008	0.059247	4.321	1.55e-05	***
ICD724	-0.136345	0.072856	-1.871	0.061287	.
ICDV70	-0.232989	0.086116	-2.706	0.00682	**
ICD530	-0.190256	0.076584	-2.484	0.012982	*
ICD715	0.245017	0.08163	3.002	0.002686	**
BMI	0.037921	0.035192	1.078	0.281233

## Sheet: RF post-logistics
Variabili	LONG DESCRIPTION	SHORT DESCRIPTION
Aspirin
CholesterolDX
Cozaar
Ecotrin
Enalapril
HypertensionDX
ICD428	Congestive heart failure, unspecified	CHF NOS
ICD443	Other peripheral vascular disease	Other peripheral vascular disease
ICD459	Hemorrhage, unspecified	Hemorrhage NOS
ICD530	Achalasia and cardiospasm	Achalasia & cardiospasm
ICD585	Chronic kidney disease	Chro kidney dis
ICD715	Osteoarthrosis, generalized, site unspecified	General osteoarthrosis
ICD724	Spinal stenosis, unspecified region	Spinal stenosis NOS
ICDV70	Routine general medical examination at a health care facility	Routine medical exam
ICDV77	Screening for thyroid disorders	Screen-thyroid disorder
Lipitor
Lisinopril
Lovastatin
Pravastatin
Simvastatin

## Sheet: summ_lasso
Variable	Estimate	Std.Error	z value	Pr(>|z|)	Significance
ICD724	-0.07827	0.07673	-1.02	0.307671
ICD477	-0.17598	0.07748	-2.271	0.023127	*
ICD300	-0.29507	0.08476	-3.481	0.000499	***
ICDV70	-0.24128	0.0883	-2.732	0.006288	**
ICD461	0.1211	0.09551	1.268	0.20484
ICD715	0.2315	0.08361	2.769	0.005624	**
ICD782	0.17174	0.09542	1.8	0.071884	.
ICDV72	-0.23731	0.13127	-1.808	0.070637	.
ICD462	-0.29504	0.14072	-2.097	0.036021	*
ICDV04	0.35635	0.11489	3.102	0.001925	**
ICD346	-0.68895	0.19317	-3.567	0.000362	***
ICD723	-0.25104	0.15744	-1.594	0.110833
ICD585	0.76682	0.13105	5.851	4.87e-09	***
ICD285	0.3641	0.1364	2.669	0.0076	**
ICD054	-0.39557	0.23416	-1.689	0.091158	.
ICD727	-0.39507	0.21303	-1.855	0.063661	.
ICD314	-1.30119	0.59443	-2.189	0.028598	*
ICD455	-0.51725	0.21706	-2.383	0.017174	*
ICD781	0.34792	0.16759	2.076	0.037892	*
ICD428	0.6748	0.1723	3.916	8.98e-05	***
ICD443	0.399	0.167	2.389	0.016883	*
ICD681	0.747	0.21869	3.416	0.000636	***
ICD302	0.81165	0.22549	3.6	0.000319	***
ICDV77	-1.94938	0.53861	-3.619	0.000295	***
ICD295	0.62704	0.24409	2.569	0.010202	*
ICD459	0.27361	0.23237	1.177	0.239008
ICD438	0.56745	0.23777	2.387	0.017006	*
HypertensionDX	0.97049	0.06531	14.861	2e-16	***
CholesterolDX	0.80384	0.06391	12.578	2e-16	***
MetabolicDX	0.63583	0.22158	2.87	0.004111	**
LISINOPRIL	0.37772	0.09096	4.153	3.28e-05	***
LIPITOR	0.25766	0.10861	2.372	0.017679	*
SIMVASTATIN	0.26417	0.10721	2.464	0.013738	*
PREDNISONE	-0.59907	0.19418	-3.085	0.002035	**
ASPIRIN	0.35809	0.13729	2.608	0.009099	**
CRESTOR	0.38807	0.1534	2.53	0.011415	*
IBUPROFEN	-0.64564	0.2756	-2.343	0.019145	*
LEXAPRO	-0.47773	0.25	-1.911	0.056019	.
SOMA	-0.549	0.30278	-1.813	0.069801	.
COUMADIN	-0.71784	0.27948	-2.568	0.010214	*
PHENTERMINE	-1.1039	0.42931	-2.571	0.010132	*
COREG	0.34895	0.20264	1.722	0.08507	.
OXYCODONE	-1.18494	0.55451	-2.137	0.032606	*
FUROSEMIDE	0.35215	0.22749	1.548	0.12162
ECOTRIN	0.75354	0.20554	3.666	0.000246	***
DEPO	-1.20078	0.48636	-2.469	0.013553	*
TRICOR	0.6285	0.21924	2.867	0.004148	**
LOVASTATIN	0.50614	0.22327	2.267	0.023395	*
LODINE	-0.73713	0.45098	-1.635	0.102152
COZAAR	0.9529	0.22591	4.218	2.46e-05	***
VALIUM	-1.2597	0.50222	-2.508	0.012132	*
ROBAXIN	-0.62009	0.52591	-1.179	0.238367
LYRICA	0.77002	0.28321	2.719	0.006551	**
ENALAPRIL	0.73204	0.25035	2.924	0.003455	**
BMI	0.04507	0.03577	1.26	0.207774

[truncated: 2 more sheets: lasso post-logistics, VENN post-logistics]
